# Supplementary material for: The Association between Gut Microbiome Diversity and Composition and Heat Tolerance in Cattle
Source: MDPI journal article supplement (doi:10.3390/microorganisms10081672), 2022-08-19
Supplement: s1 [file s1]

**Table S1 The processing result statistics of samples sequencing data**

| Sample ID | Raw Reads | Clean<br>Reads | Denoised<br>Reads | Merged<br>Reads | Nonchimeric<br>Reads |
|-----------|-----------|----------------|-------------------|-----------------|----------------------|
| HKA1      | 80,352    | 80,057         | 79,330            | 68,497          | 59,246               |
| HKA2      | 80,218    | 79,950         | 79,390            | 70,851          | 64,870               |
| HKA3      | 80,130    | 79,903         | 79,612            | 71,234          | 63,088               |
| HKB1      | 80,069    | 79,819         | 79,452            | 69,552          | 61,996               |
| HKB2      | 80,363    | 80,086         | 79,645            | 71,765          | 63,605               |
| HKB3      | 79,717    | 79,458         | 79,070            | 69,304          | 62,135               |
| HKC1      | 80,014    | 79,777         | 79,447            | 71,697          | 63,257               |
| HKC2      | 80,150    | 79,887         | 79,607            | 71,242          | 62,403               |
| HKC3      | 79,849    | 79,549         | 79,095            | 69,301          | 62,084               |
| HLJA1     | 80,155    | 79,647         | 79,117            | 67,607          | 61,337               |
| HLJA2     | 79,802    | 79,251         | 78,710            | 66,863          | 60,713               |
| HLJA3     | 79,738    | 79,177         | 78,824            | 68,090          | 57,765               |
| HLJB1     | 80,023    | 79,508         | 79,166            | 69,573          | 60,798               |
| HLJB2     | 80,029    | 79,493         | 79,013            | 66,413          | 58,017               |
| HLJB3     | 80,185    | 79,660         | 79,300            | 68,066          | 59,491               |
| HLJC1     | 80,008    | 79,396         | 79,027            | 69,421          | 62,327               |
| HLJC2     | 80,219    | 79,522         | 79,045            | 69,304          | 60,655               |
| HLJC3     | 79,913    | 79,383         | 78,866            | 66,788          | 60,136               |
| SDA1      | 80,120    | 79,626         | 79,208            | 65,132          | 60,153               |
| SDA2      | 79,905    | 79,382         | 78,868            | 64,085          | 58,597               |
| SDA3      | 80,128    | 79,582         | 79,038            | 65,099          | 58,902               |
| SDB1      | 80,119    | 79,625         | 79,224            | 69,452          | 62,758               |
| SDB2      | 79,771    | 79,267         | 78,830            | 66,395          | 59,267               |
| SDB3      | 80,107    | 79,559         | 79,023            | 66,589          | 60,910               |
| SDC1      | 80,272    | 79,716         | 79,334            | 68,471          | 60,290               |

**Continued Table S1 The processing result statistics of samples sequencing data**

| Sample ID | Raw Reads | Clean  | Denoised | Merged | Nonchimeric |
|-----------|-----------|--------|----------|--------|-------------|
|           |           | Reads  | Reads    | Reads  | Reads       |
| SDC2      | 80,154    | 79,624 | 79,078   | 68,088 | 62,622      |
| SDC3      | 80,271    | 79,734 | 79,283   | 65,513 | 58,467      |
| SSA1      | 80,146    | 79,882 | 79,505   | 71,994 | 68,287      |
| SSA2      | 79,924    | 79,702 | 79,225   | 70,640 | 66,530      |
| SSA3      | 79,792    | 79,566 | 79,173   | 70,511 | 66,097      |
| SSB1      | 79,877    | 79,638 | 79,340   | 70,586 | 67,229      |
| SSC1      | 79,984    | 79,734 | 79,442   | 70,840 | 66,646      |
| SSC2      | 80,139    | 79,846 | 79,480   | 70,971 | 67,734      |
| SSC3      | 79,889    | 79,608 | 79,221   | 69,266 | 65,277      |
