# Supplementary material for: The Association between Gut Microbiome Diversity and Composition and Heat Tolerance in Cattle
Source: Microorganisms. 2022 Aug 19;10(8):1672. doi: 10.3390/microorganisms10081672 (PMC9414853; doi:10.3390/microorganisms10081672)
Supplement: Supplementary file 1 [file microorganisms-10-01672-s001.zip]

Archive with 10 entries (10 files):
- Figure legends for supplementary materials.pdf
- Figure S1.jpg
- Figure S2.jpg
- Figure S3.jpg
- Figure S4.jpg
- Figure S5.jpg
- Figure S6.jpg
- Table S1 The processing result statistics of samples sequencing data.pdf
- Table S2 All abundance of all samples.xls
- Table S3 All reabundance of all samples.xls
