# Supplementary material for: The Association between Gut Microbiome Diversity and Composition and Heat Tolerance in Cattle
Source: Microorganisms. 2022 Aug 19;10(8):1672. doi: 10.3390/microorganisms10081672 (PMC9414853; doi:10.3390/microorganisms10081672)
Supplement: Supplementary file 1 [file microorganisms-10-01672-s001.zip › Table S2 All abundance of all samples.xls]

Phylum	Class	Order	Family	Genus	Species	HKA1	HKA2	HKA3	HKB1	HKB2	HKB3	HKC1	HKC2	HKC3	HLJA1	HLJA2	HLJA3	HLJB1	HLJB2	HLJB3	HLJC1	HLJC2	HLJC3	SDA1	SDA2	SDA3	SDB1	SDB2	SDB3	SDC1	SDC2	SDC3	SSA1	SSA2	SSA3	SSB1	SSC1	SSC2	SSC3
Actinobacteriota	Actinobacteria	Bifidobacteriales	Bifidobacteriaceae	Bifidobacterium	unclassified_Bifidobacterium	0	0	0	0	0	0	0	0	0	0	2	0	0	0	0	37	0	88	0	0	1	0	10	0	0	0	0	0	0	0	0	0	0	0
Actinobacteriota	Actinobacteria	Bifidobacteriales	Bifidobacteriaceae	unclassified_Bifidobacteriaceae	unclassified_Bifidobacteriaceae	0	111	0	0	35	14	74	13	7	0	0	0	0	0	0	0	0	0	7	0	0	0	0	0	0	0	0	0	0	0	0	0	0	0
Actinobacteriota	Actinobacteria	Corynebacteriales	Corynebacteriaceae	Corynebacterium	Corynebacterium_maris	0	3	0	122	0	10	13	0	0	0	0	0	0	0	0	0	0	0	0	0	0	0	0	0	0	0	0	0	0	0	0	0	0	0
Actinobacteriota	Actinobacteria	Corynebacteriales	Corynebacteriaceae	Corynebacterium	unclassified_Corynebacterium	0	0	0	441	0	5	35	0	0	0	0	0	0	0	0	36	26	10	0	0	0	0	0	0	0	102	0	0	0	0	0	0	0	0
Actinobacteriota	Actinobacteria	Micrococcales	Micrococcaceae	Arthrobacter	unclassified_Arthrobacter	0	0	0	0	0	0	0	0	0	0	0	38	68	27	0	0	0	0	0	0	0	0	0	0	0	0	0	0	0	0	0	0	0	0
Actinobacteriota	Actinobacteria	Micrococcales	Micrococcaceae	Glutamicibacter	unclassified_Glutamicibacter	0	0	0	0	0	0	0	0	0	0	66	0	149	25	70	62	51	36	0	0	0	0	0	0	0	0	0	0	0	0	0	0	0	0
Actinobacteriota	Actinobacteria	Micrococcales	Micrococcaceae	unclassified_Micrococcaceae	unclassified_Micrococcaceae	0	0	0	0	0	0	0	0	0	0	0	41	61	24	0	0	0	0	0	0	0	0	0	0	0	0	0	0	0	0	0	0	0	0
Actinobacteriota	Actinobacteria	Micrococcales	unclassified_Micrococcales	unclassified_Micrococcales	unclassified_Micrococcales	0	0	0	0	0	0	0	0	0	0	0	0	0	0	0	0	0	0	0	0	0	0	0	0	0	113	0	0	0	0	0	0	0	0
Actinobacteriota	Coriobacteriia	Coriobacteriales	Atopobiaceae	Atopobium	unclassified_Atopobium	0	0	0	0	0	0	0	0	0	0	0	0	0	0	0	0	0	0	0	0	0	0	0	0	0	0	0	54	0	16	28	0	0	15
Actinobacteriota	Coriobacteriia	Coriobacteriales	Atopobiaceae	Atopobium	uncultured_rumen_bacterium	0	0	0	0	0	0	0	0	0	0	0	0	4	0	0	0	0	0	0	0	0	0	0	0	0	0	0	127	160	35	49	19	28	35
Actinobacteriota	Coriobacteriia	Coriobacteriales	Atopobiaceae	Olsenella	unclassified_Olsenella	0	0	0	0	0	0	0	0	0	0	0	0	0	0	0	0	0	0	0	0	0	0	0	0	0	0	0	1745	893	765	1489	810	397	380
Actinobacteriota	Coriobacteriia	Coriobacteriales	Atopobiaceae	unclassified_Atopobiaceae	unclassified_Atopobiaceae	29	0	0	12	0	19	31	0	34	0	0	0	0	0	0	0	0	0	0	0	0	0	0	0	0	0	0	36	182	28	47	65	88	5
Actinobacteriota	Coriobacteriia	Coriobacteriales	Eggerthellaceae	DNF00809	unclassified_DNF00809	0	0	0	0	0	0	0	0	0	0	0	0	0	0	0	0	0	0	0	0	0	0	0	0	0	0	0	499	336	347	304	281	128	101
Actinobacteriota	Coriobacteriia	Coriobacteriales	Eggerthellaceae	Enterorhabdus	unclassified_Enterorhabdus	0	0	0	0	0	0	0	0	0	0	0	0	0	0	0	0	0	0	0	0	0	0	0	0	0	0	0	152	96	32	64	51	74	30
Actinobacteriota	Coriobacteriia	Coriobacteriales	Eggerthellaceae	Enterorhabdus	uncultured_rumen_bacterium	0	0	0	0	0	0	0	0	0	0	0	0	0	0	0	0	0	0	0	0	0	0	0	0	0	0	0	75	87	9	67	18	59	0
Actinobacteriota	Coriobacteriia	Coriobacteriales	Eggerthellaceae	Gordonibacter	unclassified_Gordonibacter	0	0	0	45	0	0	0	0	0	0	0	0	0	0	0	0	0	0	0	0	0	0	0	14	0	0	0	0	22	0	0	0	0	38
Actinobacteriota	Coriobacteriia	Coriobacteriales	Eggerthellaceae	Parvibacter	unclassified_Parvibacter	0	0	0	0	0	0	0	0	28	0	0	0	0	9	0	0	0	0	0	0	0	0	0	0	0	0	0	119	255	223	204	338	387	184
Actinobacteriota	Coriobacteriia	Coriobacteriales	Eggerthellaceae	Slackia	Slackia_heliotrinireducens	0	0	0	0	0	0	0	0	0	0	0	0	0	0	0	0	0	0	0	0	0	0	0	0	0	0	0	162	110	15	65	14	36	18
Actinobacteriota	Coriobacteriia	Coriobacteriales	Eggerthellaceae	unclassified_Eggerthellaceae	unclassified_Eggerthellaceae	15	4	8	0	0	11	0	0	8	0	0	0	5	0	0	0	5	0	0	0	0	0	0	17	0	0	0	247	174	44	119	51	128	40
Bacteroidota	Bacteroidia	Bacteroidales	Bacteroidaceae	Bacteroides	unclassified_Bacteroides	73	0	0	21	73	0	22	33	69	70	58	72	21	65	79	65	52	569	219	340	79	117	215	112	92	140	59	0	0	0	0	0	0	0
Bacteroidota	Bacteroidia	Bacteroidales	Bacteroidaceae	Bacteroides	uncultured_Bacteroides_sp.	878	1308	1293	511	1063	1294	818	777	492	944	1072	1609	804	1101	1081	775	893	1456	1411	1609	1779	1708	1704	2192	1662	1370	1583	188	588	388	384	279	284	492
Bacteroidota	Bacteroidia	Bacteroidales	Bacteroidales_RF16_group	unclassified_Bacteroidales_RF16_group	unclassified_Bacteroidales_RF16_group	340	0	283	380	123	258	300	245	487	513	340	258	258	269	386	508	263	100	244	408	252	241	259	5	219	84	87	0	0	4	0	0	1	31
Bacteroidota	Bacteroidia	Bacteroidales	Bacteroidales_RF16_group	uncultured_Paludibacter_sp.	uncultured_Paludibacter_sp.	0	0	0	0	0	0	0	20	65	91	52	48	50	1	52	0	0	0	6	0	106	0	53	21	0	115	70	0	0	0	0	0	0	0
Bacteroidota	Bacteroidia	Bacteroidales	Bacteroidales_RF16_group	uncultured_Parabacteroides_sp.	uncultured_Parabacteroides_sp.	70	0	0	53	0	0	0	87	16	81	213	158	59	136	132	217	210	233	68	189	215	0	27	21	209	0	43	0	0	0	0	0	0	0
Bacteroidota	Bacteroidia	Bacteroidales	Bacteroidales_RF16_group	uncultured_Porphyromonadaceae_bacterium	uncultured_Porphyromonadaceae_bacterium	1041	456	1732	0	185	1121	362	185	285	724	703	396	369	656	618	819	425	512	438	264	412	992	538	53	560	298	380	125	36	52	47	21	62	83
Bacteroidota	Bacteroidia	Bacteroidales	Bacteroidales_UCG_001	unclassified_Bacteroidales_UCG_001	unclassified_Bacteroidales_UCG_001	0	0	0	0	0	0	0	0	0	56	0	28	41	47	28	0	12	0	96	102	8	0	0	72	0	0	0	0	0	0	0	0	0	0
Bacteroidota	Bacteroidia	Bacteroidales	Bacteroidales_UCG_001	uncultured_rumen_bacterium	uncultured_rumen_bacterium	0	0	0	16	0	0	0	0	91	0	0	0	0	0	0	0	0	0	0	0	0	0	0	0	0	0	0	0	0	0	0	0	0	0
Bacteroidota	Bacteroidia	Bacteroidales	Barnesiellaceae	unclassified_Barnesiellaceae	uncultured_Bacteroidales_bacterium	0	48	109	0	0	16	0	0	0	0	3	3	0	0	0	0	30	0	0	0	7	0	25	0	81	18	86	32	10	0	0	0	7	3
Bacteroidota	Bacteroidia	Bacteroidales	Barnesiellaceae	unclassified_Barnesiellaceae	uncultured_Porphyromonadaceae_bacterium	0	0	0	0	0	0	0	0	0	0	0	44	29	0	0	0	0	0	42	56	53	15	0	0	0	0	0	0	0	0	0	0	0	0
Bacteroidota	Bacteroidia	Bacteroidales	Dysgonomonadaceae	Fermentimonas	unclassified_Fermentimonas	0	0	0	29	0	3	10	0	0	0	0	0	0	0	0	0	0	0	0	0	0	0	0	0	0	386	0	0	0	0	0	0	0	0
Bacteroidota	Bacteroidia	Bacteroidales	Dysgonomonadaceae	Fermentimonas	uncultured_prokaryote	0	0	0	0	0	0	0	0	0	0	54	0	0	0	0	84	375	0	0	0	0	0	0	0	0	453	0	0	0	0	0	0	0	0
Bacteroidota	Bacteroidia	Bacteroidales	Dysgonomonadaceae	Proteiniphilum	uncultured_prokaryote	0	0	0	0	0	0	0	0	0	0	395	0	0	0	0	531	1742	61	0	0	0	0	0	0	11	653	0	0	0	0	0	0	0	0
Bacteroidota	Bacteroidia	Bacteroidales	Dysgonomonadaceae	unclassified_Dysgonomonadaceae	unclassified_Dysgonomonadaceae	0	0	0	19	0	0	0	9	0	15	10	0	20	39	32	0	0	0	0	0	47	0	0	0	0	35	0	25	0	30	0	0	22	102
Bacteroidota	Bacteroidia	Bacteroidales	Dysgonomonadaceae	unclassified_Dysgonomonadaceae	uncultured_soil_bacterium	0	0	0	0	0	0	0	0	0	0	52	0	0	0	0	76	91	12	0	0	0	0	0	0	0	84	0	0	0	0	0	0	0	0
Bacteroidota	Bacteroidia	Bacteroidales	F082	unclassified_F082	unclassified_F082	348	90	0	409	686	401	735	580	158	369	154	157	313	412	439	320	177	532	497	553	583	221	234	329	480	185	226	174	183	307	127	160	534	385
Bacteroidota	Bacteroidia	Bacteroidales	M2PB4_65_termite_group	unclassified_M2PB4_65_termite_group	unclassified_M2PB4_65_termite_group	0	0	0	0	0	0	0	0	0	0	1	0	0	318	11	0	0	0	877	1153	0	0	19	1346	0	0	0	0	0	0	0	0	0	0
Bacteroidota	Bacteroidia	Bacteroidales	Marinifilaceae	Odoribacter	uncultured_Bacteroidales_bacterium	0	0	0	0	0	0	0	0	0	0	0	0	0	0	0	0	0	0	21	0	67	0	38	18	0	0	0	16	55	20	44	20	1	25
Bacteroidota	Bacteroidia	Bacteroidales	Muribaculaceae	unclassified_Muribaculaceae	unclassified_Muribaculaceae	1246	1971	2703	1492	4614	1505	967	1863	1624	395	324	569	331	214	452	261	229	1701	434	296	497	418	602	299	1261	509	1013	402	206	273	390	153	0	360
Bacteroidota	Bacteroidia	Bacteroidales	Muribaculaceae	uncultured_Porphyromonadaceae_bacterium	uncultured_Porphyromonadaceae_bacterium	0	0	0	0	0	0	0	0	0	0	0	47	0	0	0	0	0	0	0	0	0	37	0	0	0	0	64	0	0	0	0	0	0	0
Bacteroidota	Bacteroidia	Bacteroidales	Paludibacteraceae	unclassified_Paludibacteraceae	unclassified_Paludibacteraceae	0	0	0	0	0	0	0	0	7	0	46	25	0	0	0	0	41	0	6	35	24	0	0	21	0	31	0	0	0	0	0	0	0	0
Bacteroidota	Bacteroidia	Bacteroidales	Paludibacteraceae	unclassified_Paludibacteraceae	uncultured_Paludibacter_sp.	0	34	0	200	19	0	131	0	0	230	259	197	196	230	294	147	0	0	145	161	149	124	183	274	498	142	346	211	60	79	55	0	0	0
Bacteroidota	Bacteroidia	Bacteroidales	Prevotellaceae	Alloprevotella	uncultured_Bacteroidales_bacterium	104	0	254	171	804	39	105	21	0	381	718	471	195	155	235	22	182	94	663	245	563	390	1116	1963	892	337	712	8	101	85	82	19	150	206
Bacteroidota	Bacteroidia	Bacteroidales	Prevotellaceae	Prevotella	Prevotella_sp._BP1_145	0	32	398	0	7	0	0	0	0	0	0	0	0	0	0	0	0	0	0	0	0	0	0	0	0	0	0	0	0	1	0	0	0	0
Bacteroidota	Bacteroidia	Bacteroidales	Prevotellaceae	Prevotella	unclassified_Prevotella	300	0	0	54	0	0	0	255	109	30	70	52	0	0	59	247	35	0	55	18	116	35	174	23	0	101	219	52	261	422	53	284	187	224
Bacteroidota	Bacteroidia	Bacteroidales	Prevotellaceae	Prevotellaceae_Ga6A1_group	unclassified_Prevotellaceae_Ga6A1_group	0	0	0	0	0	0	0	0	0	0	0	0	0	0	0	92	69	247	0	0	0	0	0	0	0	0	0	0	0	0	0	0	0	0
Bacteroidota	Bacteroidia	Bacteroidales	Prevotellaceae	Prevotellaceae_UCG_001	unclassified_Prevotellaceae_UCG_001	0	0	0	92	144	122	0	91	88	31	114	129	56	121	136	128	22	0	59	180	0	211	132	133	89	44	207	0	0	0	0	0	0	0
Bacteroidota	Bacteroidia	Bacteroidales	Prevotellaceae	Prevotellaceae_UCG_001	uncultured_Bacteroidales_bacterium	109	477	216	0	223	0	96	13	0	84	0	84	0	55	0	82	0	0	0	0	0	0	0	0	0	0	0	1156	494	1899	503	1785	1056	732
Bacteroidota	Bacteroidia	Bacteroidales	Prevotellaceae	Prevotellaceae_UCG_003	unclassified_Prevotellaceae_UCG_003	655	21	292	1211	348	195	113	627	343	278	276	200	101	249	175	280	94	60	494	293	335	511	613	534	658	456	294	24	17	0	18	20	92	41
Bacteroidota	Bacteroidia	Bacteroidales	Prevotellaceae	Prevotellaceae_UCG_003	uncultured_Bacteroidales_bacterium	341	175	430	635	319	662	0	640	295	600	617	1132	265	374	621	424	399	559	1328	1240	2120	747	911	900	1826	1272	797	23	18	0	46	36	18	91
Bacteroidota	Bacteroidia	Bacteroidales	Prevotellaceae	Prevotellaceae_UCG_004	unclassified_Prevotellaceae_UCG_004	317	271	65	1155	244	1049	641	838	714	587	670	658	580	721	592	516	318	663	713	582	617	508	653	830	788	1100	562	570	922	542	896	438	160	1373
Bacteroidota	Bacteroidia	Bacteroidales	Prevotellaceae	Prevotellaceae_UCG_004	uncultured_Bacteroidales_bacterium	34	49	55	140	161	33	170	111	25	25	53	64	23	78	83	6	37	61	49	116	173	220	227	82	199	199	177	164	429	344	125	272	521	425
Bacteroidota	Bacteroidia	Bacteroidales	Prevotellaceae	unclassified_Prevotellaceae	unclassified_Prevotellaceae	59	0	142	9	0	216	41	60	57	0	39	58	22	40	0	15	0	99	67	252	193	150	62	167	0	117	198	0	0	0	0	0	0	0
Bacteroidota	Bacteroidia	Bacteroidales	Rikenellaceae	Alistipes	unclassified_Alistipes	2688	1622	1275	2732	1652	1811	2765	1975	2211	1932	1822	1760	1683	1838	2292	1607	1749	2209	1562	2242	2314	1979	2540	1773	2337	2371	3151	548	210	552	265	296	921	794
Bacteroidota	Bacteroidia	Bacteroidales	Rikenellaceae	Anaerocella	uncultured_Bacteroidetes_bacterium	0	0	0	0	0	0	0	0	0	0	143	0	0	0	0	7	139	0	0	0	0	0	0	0	0	70	0	0	0	0	0	0	0	0
Bacteroidota	Bacteroidia	Bacteroidales	Rikenellaceae	Rikenellaceae_RC9_gut_group	unclassified_Rikenellaceae_RC9_gut_group	660	1688	241	1421	2494	1960	3380	1950	1689	289	163	453	229	225	384	249	77	634	858	944	628	1230	1349	569	1543	518	589	1815	886	1344	830	934	1391	1610
Bacteroidota	Bacteroidia	Bacteroidales	Rikenellaceae	Rikenellaceae_RC9_gut_group	uncultured_Bacteroidales_bacterium	2277	2319	3349	2616	4922	4200	4431	3154	2032	1273	1176	1828	1064	1221	1354	844	1464	1574	1698	988	2393	2912	2598	2033	3301	2277	3603	466	209	161	194	143	110	183
Bacteroidota	Bacteroidia	Bacteroidales	Rikenellaceae	dgA_11_gut_group	unclassified_dgA_11_gut_group	590	153	302	556	252	980	1132	423	498	164	345	283	370	356	169	160	130	216	902	450	660	581	996	548	781	332	141	894	1029	718	465	522	284	759
Bacteroidota	Bacteroidia	Bacteroidales	Rikenellaceae	unclassified_Rikenellaceae	unclassified_Rikenellaceae	49	30	19	89	19	0	98	0	71	11	19	0	21	0	22	0	0	0	27	15	0	0	0	0	0	0	0	0	0	0	0	0	0	0
Bacteroidota	Bacteroidia	Bacteroidales	Tannerellaceae	Parabacteroides	unclassified_Parabacteroides	59	193	55	36	104	41	167	124	0	24	23	33	0	12	0	22	37	15	54	25	18	62	135	80	77	133	149	0	0	9	6	0	0	0
Bacteroidota	Bacteroidia	Bacteroidales	gir_aah93h0	unclassified_gir_aah93h0	unclassified_gir_aah93h0	0	0	0	0	0	0	0	0	0	0	17	25	11	0	15	0	0	0	54	30	0	32	38	25	61	0	0	0	0	0	0	0	0	0
Bacteroidota	Bacteroidia	Bacteroidales	p_251_o5	unclassified_p_251_o5	unclassified_p_251_o5	0	0	0	0	0	0	0	0	0	276	62	0	53	28	49	306	33	49	160	148	81	0	0	81	0	0	0	25	65	0	25	34	253	30
Bacteroidota	Bacteroidia	Bacteroidales	p_251_o5	uncultured_Bacteroidales_bacterium	uncultured_Bacteroidales_bacterium	0	0	0	155	0	9	130	0	73	20	109	0	0	114	4	73	0	25	16	273	0	0	29	0	0	0	270	0	0	0	0	0	0	0
Bacteroidota	Bacteroidia	Bacteroidales	p_2534_18B5_gut_group	unclassified_p_2534_18B5_gut_group	unclassified_p_2534_18B5_gut_group	652	404	2	703	0	1428	0	560	356	134	286	266	160	281	263	298	28	0	460	115	1335	1110	842	640	1214	438	468	0	0	0	0	0	0	0
Bacteroidota	Bacteroidia	Bacteroidales	unclassified_Bacteroidales	unclassified_Bacteroidales	unclassified_Bacteroidales	372	0	45	110	104	38	139	335	202	606	335	356	409	270	579	257	439	486	376	184	172	370	391	325	194	259	323	13	0	120	0	214	85	118
Bacteroidota	Bacteroidia	Bacteroidales	unclassified_Bacteroidales	uncultured_Bacteroidales_bacterium	unclassified_Bacteroidales	176	78	41	279	90	184	56	405	121	411	364	407	361	465	790	274	252	389	378	370	274	459	390	237	915	252	390	0	0	11	55	0	24	163
Bacteroidota	Bacteroidia	Flavobacteriales	Crocinitomicaceae	Brumimicrobium	unclassified_Brumimicrobium	0	0	0	0	0	0	0	0	0	0	0	0	0	0	0	0	99	0	0	0	0	0	0	0	0	18	0	0	0	0	0	0	0	0
Bacteroidota	Bacteroidia	Flavobacteriales	Crocinitomicaceae	Fluviicola	unclassified_Fluviicola	0	0	0	0	0	0	0	0	0	170	225	0	137	0	0	33	0	91	0	0	0	0	0	0	0	0	0	0	0	0	0	0	0	0
Bacteroidota	Bacteroidia	Flavobacteriales	Flavobacteriaceae	Aequorivita	unclassified_Aequorivita	0	0	0	0	0	0	0	0	0	0	4	0	0	0	0	4	17	0	0	0	0	0	0	0	0	98	0	0	0	0	0	0	0	0
Bacteroidota	Bacteroidia	Flavobacteriales	Flavobacteriaceae	Aequorivita	uncultured_Aequorivita_sp.	0	0	0	0	0	0	0	0	0	0	0	0	0	0	0	9	68	0	0	0	0	0	0	0	0	134	0	0	0	0	0	0	0	0
Bacteroidota	Bacteroidia	Flavobacteriales	Flavobacteriaceae	Flavobacterium	unclassified_Flavobacterium	0	0	0	39	0	0	6	0	0	272	423	666	2465	314	408	323	395	1028	0	0	0	0	0	0	0	146	0	0	0	0	0	0	0	0
Bacteroidota	Bacteroidia	Flavobacteriales	Flavobacteriaceae	Myroides	Myroides_bacterium_SM9_19	0	0	0	0	0	0	0	0	0	65	198	90	367	14	188	241	192	75	0	0	0	0	0	0	0	0	0	0	0	0	0	0	0	0
Bacteroidota	Bacteroidia	Flavobacteriales	Flavobacteriaceae	unclassified_Flavobacteriaceae	unclassified_Flavobacteriaceae	0	0	0	83	0	0	26	0	0	0	94	0	0	0	0	0	153	10	0	0	0	0	0	0	0	0	0	0	0	0	0	0	0	0
Bacteroidota	Bacteroidia	Flavobacteriales	Weeksellaceae	Chryseobacterium	Chryseobacterium_sp._LW_NC3	0	0	0	0	0	0	0	0	0	78	184	48	0	0	0	5	0	23	0	0	0	0	0	0	0	0	0	0	0	0	0	0	0	0
Bacteroidota	Bacteroidia	Flavobacteriales	Weeksellaceae	Ornithobacterium	unclassified_Ornithobacterium	0	0	0	0	0	0	0	0	0	0	0	0	0	0	0	0	10	5	0	0	0	0	0	0	0	122	0	0	0	0	0	0	0	0
Bacteroidota	Bacteroidia	Sphingobacteriales	Sphingobacteriaceae	Sphingobacterium	Sphingobacterium_alimentarium	0	0	0	0	0	0	0	0	0	60	100	109	373	267	281	32	0	92	0	0	0	0	0	0	0	0	0	0	0	0	0	0	0	0
Bacteroidota	Bacteroidia	Sphingobacteriales	Sphingobacteriaceae	Sphingobacterium	Sphingobacterium_sp._ML3W	0	0	0	0	0	0	0	0	0	19	28	48	111	0	0	43	0	53	0	0	0	0	0	0	0	0	0	0	0	0	0	0	0	0
Bacteroidota	Bacteroidia	unclassified_Bacteroidia	unclassified_Bacteroidia	unclassified_Bacteroidia	unclassified_Bacteroidia	0	0	0	40	0	0	0	55	34	0	0	26	0	11	17	0	0	0	52	14	0	45	9	31	0	0	0	52	76	41	81	34	0	52
Campylobacterota	Campylobacteria	Campylobacterales	Arcobacteraceae	Arcobacter	Aliarcobacter_skirrowii	0	0	0	0	0	0	0	0	0	0	0	0	0	0	0	49	317	0	0	0	0	0	0	0	0	29	0	0	0	0	0	0	0	0
Campylobacterota	Campylobacteria	Campylobacterales	Arcobacteraceae	Arcobacter	unclassified_Arcobacter	0	0	0	0	0	0	0	0	0	6649	9308	0	1060	0	0	605	8628	1259	0	0	0	0	0	0	0	0	0	0	0	0	0	0	0	0
Campylobacterota	Campylobacteria	Campylobacterales	Arcobacteraceae	Pseudarcobacter	unclassified_Pseudarcobacter	0	0	0	0	0	0	0	0	0	153	0	0	0	0	0	0	0	0	0	0	0	0	0	0	0	0	0	0	0	0	0	0	0	0
Campylobacterota	Campylobacteria	Campylobacterales	Campylobacteraceae	Campylobacter	unclassified_Campylobacter	0	0	0	0	0	0	0	0	0	0	0	0	0	0	15	22	24	79	0	0	115	9	0	0	0	0	0	0	0	0	0	0	0	0
Chloroflexi	Anaerolineae	Anaerolineales	Anaerolineaceae	Flexilinea	uncultured_rumen_bacterium	0	0	0	0	0	0	0	0	0	0	0	0	0	0	0	0	0	0	0	0	0	0	0	0	0	0	0	103	191	0	48	0	0	137
Cyanobacteria	Cyanobacteriia	Cyanobacteriales	unclassified_Cyanobacteriales	unclassified_Cyanobacteriales	unclassified_Cyanobacteriales	0	0	0	0	0	0	0	0	0	0	0	0	0	0	0	0	0	0	0	0	0	0	0	0	0	0	0	220	0	0	0	0	0	0
Cyanobacteria	Cyanobacteriia	Synechococcales	Cyanobiaceae	Cyanobium_PCC_6307	unclassified_Cyanobium_PCC_6307	0	0	0	0	0	0	0	0	0	0	0	0	0	0	0	0	0	0	0	0	0	0	0	0	0	0	0	37	683	109	279	114	618	126
Cyanobacteria	Cyanobacteriia	Synechococcales	Cyanobiaceae	unclassified_Cyanobiaceae	unclassified_Cyanobiaceae	0	0	0	0	0	0	0	0	0	0	0	0	0	0	0	0	0	0	0	0	0	0	0	0	0	0	0	155	0	19	0	14	14	149
Cyanobacteria	Vampirivibrionia	Gastranaerophilales	unclassified_Gastranaerophilales	unclassified_Gastranaerophilales	unclassified_Gastranaerophilales	0	0	0	0	0	50	43	78	132	130	163	23	70	215	245	31	25	0	184	175	202	116	123	98	74	188	49	0	0	13	0	0	0	11
Cyanobacteria	Vampirivibrionia	Gastranaerophilales	uncultured_rumen_bacterium	uncultured_rumen_bacterium	uncultured_rumen_bacterium	0	0	0	0	0	0	0	43	0	67	25	0	14	49	79	10	0	0	201	91	158	0	0	115	0	75	0	51	42	16	51	13	0	68
Desulfobacterota	Desulfovibrionia	Desulfovibrionales	Desulfomicrobiaceae	Desulfomicrobium	unclassified_Desulfomicrobium	0	0	0	0	0	0	0	0	0	0	0	0	0	0	0	0	0	0	0	0	0	0	0	0	0	197	0	0	0	0	0	0	0	0
Desulfobacterota	Desulfovibrionia	Desulfovibrionales	Desulfovibrionaceae	Mailhella	unclassified_Mailhella	0	4	3	0	0	0	0	0	0	171	202	226	237	352	437	156	171	274	514	384	563	78	34	544	194	118	59	0	16	0	0	0	0	13
Desulfobacterota	Desulfuromonadia	Bradymonadales	uncultured_rumen_bacterium	uncultured_rumen_bacterium	uncultured_rumen_bacterium	0	0	0	0	0	0	0	0	0	19	0	0	0	263	31	0	0	61	129	447	77	0	29	33	0	0	0	0	0	0	0	0	0	0
Elusimicrobiota	Elusimicrobia	Elusimicrobiales	Elusimicrobiaceae	Elusimicrobium	unclassified_Elusimicrobium	29	0	0	9	0	0	0	17	0	16	0	0	0	26	0	7	0	0	77	37	176	44	0	44	21	28	0	0	29	0	0	0	0	34
Fibrobacterota	Fibrobacteria	Fibrobacterales	Fibrobacteraceae	Fibrobacter	unclassified_Fibrobacter	0	0	0	0	0	0	0	0	0	0	89	49	51	216	78	0	0	0	423	300	43	0	147	243	0	241	0	0	0	0	0	0	0	0
Firmicutes	Bacilli	Acholeplasmatales	Acholeplasmataceae	Acholeplasma	Acholeplasma_laidlawii	0	0	0	0	0	0	0	0	0	18	146	0	33	0	0	311	247	28	0	0	0	0	0	0	0	16	0	0	0	0	0	0	0	0
Firmicutes	Bacilli	Acholeplasmatales	Acholeplasmataceae	Acholeplasma	Paracholeplasma_brassicae	0	0	0	0	0	0	0	0	0	0	74	0	0	0	0	59	53	0	0	0	0	0	0	0	0	0	0	0	0	0	0	0	0	0
Firmicutes	Bacilli	Acholeplasmatales	Acholeplasmataceae	Acholeplasma	unclassified_Acholeplasma	0	0	0	0	0	0	0	0	0	0	81	0	16	0	0	206	1104	0	0	0	0	0	0	0	0	0	0	0	0	0	0	0	0	0
Firmicutes	Bacilli	Acholeplasmatales	Acholeplasmataceae	Anaeroplasma	unclassified_Anaeroplasma	0	0	0	0	0	0	0	0	0	0	0	0	0	0	0	0	0	0	0	0	0	0	0	0	0	0	0	130	0	7	357	0	0	0
Firmicutes	Bacilli	Acholeplasmatales	Acholeplasmataceae	Anaeroplasma	uncultured_Anaeroplasma_sp.	6	0	0	0	0	0	0	0	0	0	17	54	11	13	0	0	0	0	0	0	0	12	0	0	0	0	0	0	0	0	0	0	0	0
Firmicutes	Bacilli	Acholeplasmatales	Acholeplasmataceae	EMP_G18	uncultured_Mollicutes_bacterium	25	0	56	0	0	0	0	16	0	0	0	36	0	0	0	0	0	39	0	0	0	0	0	0	0	0	0	0	0	0	0	0	0	0
Firmicutes	Bacilli	Bacillales	Bacillaceae	Bacillus	unclassified_Bacillus	0	0	0	0	0	0	0	0	0	2	0	49	88	115	66	0	0	0	0	0	0	0	0	0	0	0	0	176	233	399	39	527	287	67
Firmicutes	Bacilli	Bacillales	Bacillaceae	Geobacillus	unclassified_Geobacillus	0	0	0	0	0	0	0	0	0	0	0	0	0	0	0	0	0	0	19	0	25	0	0	26	0	36	14	0	0	0	0	0	0	0
Firmicutes	Bacilli	Bacillales	Planococcaceae	Caryophanon	unclassified_Caryophanon	0	0	0	0	0	0	0	0	0	0	0	434	0	0	0	0	0	0	0	0	0	0	0	0	0	0	0	0	0	0	0	0	0	0
Firmicutes	Bacilli	Bacillales	Planococcaceae	Lysinibacillus	unclassified_Lysinibacillus	0	0	0	0	0	0	0	0	0	1038	0	1313	4467	2654	2529	84	0	231	136	0	35	0	0	0	0	0	0	27	0	35	14	0	12	0
Firmicutes	Bacilli	Bacillales	Planococcaceae	Psychrobacillus	unclassified_Psychrobacillus	0	0	0	0	0	0	0	0	0	72	0	65	204	231	169	0	0	0	0	0	0	0	0	0	0	0	0	0	0	0	0	0	0	0
Firmicutes	Bacilli	Bacillales	Planococcaceae	Solibacillus	unclassified_Solibacillus	0	0	0	0	0	0	0	0	0	1622	95	5672	2513	6066	3738	301	136	696	0	0	0	0	0	0	0	344	0	0	0	0	0	0	0	0
Firmicutes	Bacilli	Bacillales	Planococcaceae	unclassified_Planococcaceae	unclassified_Planococcaceae	0	0	0	0	0	0	0	0	0	1109	0	4167	3600	5341	4094	70	21	617	0	0	0	0	0	0	0	0	0	0	29	0	0	0	0	0
Firmicutes	Bacilli	Erysipelotrichales	Erysipelatoclostridiaceae	Candidatus_Stoquefichus	unclassified_Candidatus_Stoquefichus	263	476	184	0	219	23	0	0	0	0	0	55	27	0	55	0	0	0	0	0	0	0	0	0	0	0	0	0	0	0	0	0	0	0
Firmicutes	Bacilli	Erysipelotrichales	Erysipelatoclostridiaceae	Erysipelatoclostridium	unclassified_Erysipelatoclostridium	32	198	193	0	58	33	33	57	0	0	0	0	0	0	0	0	0	20	14	0	0	23	9	0	0	23	36	35	81	49	114	86	52	74
Firmicutes	Bacilli	Erysipelotrichales	Erysipelatoclostridiaceae	UCG_004	unclassified_UCG_004	17	28	0	0	108	0	6	0	0	12	0	27	0	0	22	0	0	158	0	0	0	0	0	2	0	0	0	80	0	0	0	0	10	0
Firmicutes	Bacilli	Erysipelotrichales	Erysipelatoclostridiaceae	UCG_004	uncultured_Erysipelotrichaceae_bacterium	22	0	0	0	0	0	0	42	0	0	0	0	14	0	0	0	0	51	0	0	0	0	0	0	0	0	0	0	0	0	0	0	0	0
Firmicutes	Bacilli	Erysipelotrichales	Erysipelotrichaceae	Breznakia	unclassified_Breznakia	0	35	32	0	0	47	14	39	39	0	0	14	0	0	9	0	0	10	4	3	14	0	7	0	0	10	0	0	0	0	0	0	0	0
Firmicutes	Bacilli	Erysipelotrichales	Erysipelotrichaceae	Catenisphaera	uncultured_rumen_bacterium	0	0	0	0	0	0	0	0	0	0	0	0	0	0	0	0	0	0	0	0	0	0	0	0	0	0	0	140	146	91	117	80	327	57
Firmicutes	Bacilli	Erysipelotrichales	Erysipelotrichaceae	Dielma	unclassified_Dielma	65	35	46	0	48	0	0	90	0	0	0	0	0	0	0	0	0	0	0	0	0	0	0	0	0	0	0	0	0	0	0	0	66	0
Firmicutes	Bacilli	Erysipelotrichales	Erysipelotrichaceae	Erysipelothrix	unclassified_Erysipelothrix	0	0	0	0	0	0	0	0	0	65	53	0	43	0	0	546	793	89	0	0	0	0	0	0	0	356	0	0	0	0	0	0	0	0
Firmicutes	Bacilli	Erysipelotrichales	Erysipelotrichaceae	Erysipelotrichaceae_UCG_009	unclassified_Erysipelotrichaceae_UCG_009	0	0	0	0	0	0	0	0	0	0	0	0	0	0	0	0	0	0	0	0	0	0	0	0	0	0	0	304	262	196	405	354	0	0
Firmicutes	Bacilli	Erysipelotrichales	Erysipelotrichaceae	Erysipelotrichaceae_UCG_009	uncultured_rumen_bacterium	0	44	32	0	61	0	0	0	0	0	0	0	0	0	0	0	0	0	0	0	0	0	0	0	0	0	10	518	243	398	132	183	207	444
Firmicutes	Bacilli	Erysipelotrichales	Erysipelotrichaceae	Faecalitalea	unclassified_Faecalitalea	19	8	0	0	168	9	33	43	64	0	2	25	20	16	49	39	89	44	22	15	14	0	33	0	79	0	54	0	0	0	0	0	30	0
Firmicutes	Bacilli	Erysipelotrichales	Erysipelotrichaceae	Turicibacter	unclassified_Turicibacter	227	406	229	81	635	66	473	57	199	22	11	36	0	20	0	38	16	0	122	252	236	216	249	358	196	137	255	99	47	47	47	48	18	14
Firmicutes	Bacilli	Erysipelotrichales	Erysipelotrichaceae	[Anaerorhabdus]_furcosa_group	unclassified_[Anaerorhabdus]_furcosa_group	74	168	108	114	105	57	97	168	153	14	36	50	21	16	34	34	13	0	52	52	42	59	54	0	15	80	47	51	64	51	150	69	32	16
Firmicutes	Bacilli	Erysipelotrichales	Erysipelotrichaceae	unclassified_Erysipelotrichaceae	unclassified_Erysipelotrichaceae	23	7	0	67	0	116	10	102	175	0	11	12	0	13	0	0	9	0	29	47	11	0	22	38	33	20	22	63	0	11	52	17	19	46
Firmicutes	Bacilli	Erysipelotrichales	Erysipelotrichaceae	unclassified_Erysipelotrichaceae	uncultured_rumen_bacterium	0	0	0	0	22	0	0	35	27	0	0	0	0	0	0	0	0	0	0	0	0	0	0	0	0	0	0	0	0	0	0	0	0	0
Firmicutes	Bacilli	Izemoplasmatales	unclassified_Izemoplasmatales	unclassified_Izemoplasmatales	unclassified_Izemoplasmatales	30	18	21	0	101	67	0	19	19	0	0	30	0	0	0	0	53	0	0	0	0	43	0	0	0	49	31	0	0	0	0	0	0	0
Firmicutes	Bacilli	Lactobacillales	Aerococcaceae	unclassified_Aerococcaceae	unclassified_Aerococcaceae	0	0	0	0	0	0	0	0	0	0	75	19	14	0	0	123	83	87	0	0	0	0	0	0	0	0	0	0	0	0	0	0	0	0
Firmicutes	Bacilli	Lactobacillales	Carnobacteriaceae	Atopostipes	unclassified_Atopostipes	0	0	0	568	0	0	47	0	0	0	0	0	0	0	0	0	46	0	0	0	0	0	0	0	0	52	0	0	0	0	0	0	0	0
Firmicutes	Bacilli	Lactobacillales	Carnobacteriaceae	Jeotgalibaca	unclassified_Jeotgalibaca	0	0	0	0	0	0	0	0	0	120	52	32	0	0	0	226	81	270	0	0	0	0	0	0	0	147	0	0	0	0	0	0	0	0
Firmicutes	Bacilli	Lactobacillales	Enterococcaceae	Enterococcus	unclassified_Enterococcus	0	0	0	0	16	0	8	0	0	0	0	0	0	0	0	0	87	0	0	0	0	0	0	0	0	0	0	0	0	0	0	0	0	0
Firmicutes	Bacilli	Lactobacillales	Streptococcaceae	Streptococcus	unclassified_Streptococcus	0	0	0	0	8	0	0	0	0	0	0	0	1	0	0	0	0	0	0	0	0	0	0	0	0	0	0	206	107	164	119	208	129	90
Firmicutes	Bacilli	Paenibacillales	Paenibacillaceae	Paenibacillus	unclassified_Paenibacillus	0	0	0	0	0	0	0	0	0	0	0	118	0	0	0	0	0	0	0	0	0	0	0	0	0	0	0	0	0	0	0	0	0	0
Firmicutes	Bacilli	RF39	unclassified_RF39	unclassified_RF39	unclassified_RF39	54	654	26	39	102	108	466	194	595	97	17	25	0	0	44	52	0	0	136	108	83	172	170	111	213	217	101	704	749	468	791	433	381	1000
Firmicutes	Bacilli	RF39	uncultured_Erysipelotrichaceae_bacterium	uncultured_Erysipelotrichaceae_bacterium	uncultured_Erysipelotrichaceae_bacterium	45	61	0	32	49	0	0	26	0	0	0	0	0	0	0	0	33	0	0	0	62	15	102	0	39	60	8	194	53	59	112	74	40	76
Firmicutes	Bacilli	RF39	uncultured_Firmicutes_bacterium	uncultured_Firmicutes_bacterium	uncultured_Firmicutes_bacterium	30	0	0	120	0	0	381	150	123	0	17	0	0	9	0	43	15	0	0	11	14	0	0	0	59	45	42	0	0	0	0	0	0	186
Firmicutes	Bacilli	RF39	uncultured_prokaryote	uncultured_prokaryote	uncultured_prokaryote	95	27	24	0	36	0	194	51	89	26	22	0	0	41	0	19	19	0	74	45	93	81	0	102	123	111	13	86	206	380	243	329	33	360
Firmicutes	Bacilli	RF39	uncultured_rumen_bacterium	uncultured_rumen_bacterium	uncultured_rumen_bacterium	108	291	370	55	113	153	84	204	86	0	0	5	34	13	18	12	0	0	66	23	8	156	78	19	138	187	14	171	267	488	649	417	68	97
Firmicutes	Bacilli	RF39	unidentified_rumen_bacterium_RF39	unclassified_unidentified_rumen_bacterium_RF39	unclassified_unidentified_rumen_bacterium_RF39	0	29	0	0	47	111	0	0	0	0	40	0	0	0	42	38	0	21	84	65	55	79	0	141	64	66	21	365	277	176	147	168	247	451
Firmicutes	Bacilli	RF39	unidentified_rumen_bacterium_RF9	unclassified_unidentified_rumen_bacterium_RF9	unclassified_unidentified_rumen_bacterium_RF9	0	0	0	0	0	0	0	0	0	0	0	0	13	0	0	40	0	0	17	0	54	0	0	0	57	39	84	0	47	29	134	25	0	9
Firmicutes	Bacilli	Staphylococcales	Staphylococcaceae	Aliicoccus	unclassified_Aliicoccus	0	0	0	111	0	12	0	0	0	0	0	0	0	0	0	0	0	0	0	0	0	0	0	0	0	0	0	0	1	0	0	0	0	0
Firmicutes	Clostridia	Christensenellales	Christensenellaceae	Christensenellaceae_R_7_group	Christensenella_sp._Marseille_P3954	0	0	0	0	0	0	0	0	0	0	0	0	0	0	0	0	0	0	0	0	0	0	0	0	0	0	0	64	73	34	36	40	62	38
Firmicutes	Clostridia	Christensenellales	Christensenellaceae	Christensenellaceae_R_7_group	Christensenellaceae_R_7_group_bacterium_AC2043	0	0	0	0	0	0	0	0	0	0	0	0	0	0	0	0	0	0	0	0	0	0	0	0	0	0	0	361	264	157	168	123	285	127
Firmicutes	Clostridia	Christensenellales	Christensenellaceae	Christensenellaceae_R_7_group	Christensenellaceae_R_7_group_bacterium_YE57	69	79	45	0	150	77	189	77	83	28	20	0	0	0	0	29	13	15	26	25	53	36	28	39	0	37	37	46	97	107	44	86	67	80
Firmicutes	Clostridia	Christensenellales	Christensenellaceae	Christensenellaceae_R_7_group	unclassified_Christensenellaceae_R_7_group	1338	949	909	1628	416	1490	1210	846	1546	577	339	288	191	411	396	498	286	830	1491	1420	1423	824	1308	1266	1029	911	727	5118	6258	2034	2320	2460	3366	2512
Firmicutes	Clostridia	Christensenellales	Christensenellaceae	Christensenellaceae_R_7_group	uncultured_Ruminococcus_sp.	0	0	0	0	0	0	0	0	9	0	0	0	0	19	17	0	0	0	49	113	125	0	27	24	0	0	0	0	23	0	0	0	7	0
Firmicutes	Clostridia	Christensenellales	Christensenellaceae	Christensenellaceae_R_7_group	uncultured_prokaryote	698	1084	704	433	1104	581	1212	543	650	96	215	159	122	181	116	197	14	164	267	483	368	561	406	353	268	227	301	526	599	266	268	207	340	369
Firmicutes	Clostridia	Christensenellales	Christensenellaceae	Christensenellaceae_R_7_group	uncultured_rumen_bacterium_4C0d_15	0	0	0	0	0	0	0	0	0	0	0	0	0	0	0	0	0	0	0	0	0	0	0	0	0	0	0	32	0	0	13	0	49	38
Firmicutes	Clostridia	Christensenellales	Christensenellaceae	Christensenellaceae_R_7_group	uncultured_sludge_bacterium	0	0	0	0	0	0	0	0	0	0	0	0	0	0	0	0	0	0	0	0	0	0	0	16	0	0	0	56	63	40	56	59	67	0
Firmicutes	Clostridia	Christensenellales	Christensenellaceae	unclassified_Christensenellaceae	unclassified_Christensenellaceae	50	69	7	134	44	99	184	74	142	21	0	10	28	33	31	12	5	21	83	53	65	48	42	180	0	41	26	293	145	111	137	155	128	106
Firmicutes	Clostridia	Clostridia_UCG_014	unclassified_Clostridia_UCG_014	unclassified_Clostridia_UCG_014	unclassified_Clostridia_UCG_014	1271	2804	1659	472	1670	1134	2319	954	1667	139	126	8	28	214	81	122	58	69	601	505	703	357	505	795	233	596	151	3179	4111	6215	4591	6078	6060	5967
Firmicutes	Clostridia	Clostridia_UCG_014	uncultured_Clostridiales_bacterium	uncultured_Clostridiales_bacterium	uncultured_Clostridiales_bacterium	0	0	0	0	0	0	0	0	0	0	0	0	0	0	0	0	0	0	0	0	0	0	0	0	0	0	0	636	0	0	0	0	0	0
Firmicutes	Clostridia	Clostridia_UCG_014	uncultured_Ruminococcaceae_bacterium	uncultured_Ruminococcaceae_bacterium	uncultured_Ruminococcaceae_bacterium	0	0	0	0	0	0	0	42	0	0	0	0	0	0	0	20	0	35	0	49	0	0	23	106	0	0	0	387	562	369	260	357	264	360
Firmicutes	Clostridia	Clostridia_UCG_014	uncultured_rumen_bacterium	uncultured_rumen_bacterium	uncultured_rumen_bacterium	0	0	95	146	105	121	0	1183	317	0	30	16	0	0	0	8	33	0	64	39	144	220	324	61	258	294	250	753	1038	1295	899	1371	1057	1199
Firmicutes	Clostridia	Clostridia_UCG_014	unidentified_rumen_bacterium_JW32	unclassified_unidentified_rumen_bacterium_JW32	unclassified_unidentified_rumen_bacterium_JW32	32	277	314	28	293	20	122	149	61	17	0	0	0	0	7	8	10	0	71	0	127	18	156	50	0	71	33	18	612	32	243	270	120	242
Firmicutes	Clostridia	Clostridia_UCG_014	unidentified_rumen_bacterium_RFN25	unclassified_unidentified_rumen_bacterium_RFN25	unclassified_unidentified_rumen_bacterium_RFN25	0	0	0	0	0	0	0	0	0	0	0	0	0	0	0	0	0	0	0	0	0	0	0	0	0	0	0	135	147	0	52	0	0	131
Firmicutes	Clostridia	Clostridia_vadinBB60_group	unclassified_Clostridia_vadinBB60_group	unclassified_Clostridia_vadinBB60_group	unclassified_Clostridia_vadinBB60_group	221	60	84	36	58	108	126	23	84	295	319	151	330	264	193	94	139	421	27	12	151	138	0	28	160	17	0	0	0	0	0	0	0	31
Firmicutes	Clostridia	Clostridia_vadinBB60_group	uncultured_Clostridiales_bacterium	uncultured_Clostridiales_bacterium	uncultured_Clostridiales_bacterium	84	0	0	0	12	0	7	0	0	19	22	11	11	12	17	31	0	19	0	0	14	0	0	0	0	12	0	0	1	0	0	0	0	0
Firmicutes	Clostridia	Clostridia_vadinBB60_group	uncultured_rumen_bacterium	uncultured_rumen_bacterium	uncultured_rumen_bacterium	0	0	0	35	0	13	41	37	5	125	70	91	64	100	43	81	104	103	23	0	40	0	0	0	22	0	0	0	0	0	0	0	0	0
Firmicutes	Clostridia	Clostridiales	Clostridiaceae	Clostridium_sensu_stricto_1	Clostridium_butyricum	0	0	0	0	0	0	0	0	0	0	0	0	0	0	0	0	0	0	0	45	0	0	115	0	0	0	0	0	0	0	0	0	0	0
Firmicutes	Clostridia	Clostridiales	Clostridiaceae	Clostridium_sensu_stricto_1	unclassified_Clostridium_sensu_stricto_1	1616	692	711	170	809	83	686	150	399	154	304	1670	90	115	132	117	461	192	151	153	122	692	802	260	284	713	347	0	0	0	0	0	0	0
Firmicutes	Clostridia	Clostridiales	Clostridiaceae	Clostridium_sensu_stricto_13	unclassified_Clostridium_sensu_stricto_13	0	0	0	0	0	0	0	0	0	0	0	0	0	33	53	16	0	9	0	0	0	0	0	0	0	0	0	0	0	0	0	0	0	0
Firmicutes	Clostridia	Clostridiales	Clostridiaceae	Clostridium_sensu_stricto_6	Clostridium_bornimense	0	43	0	0	9	11	64	0	17	0	0	0	0	0	0	0	0	0	0	12	0	60	135	0	198	0	251	0	0	0	0	0	0	0
Firmicutes	Clostridia	Clostridiales	Clostridiaceae	Proteiniclasticum	unclassified_Proteiniclasticum	0	0	0	0	0	0	0	0	0	0	0	0	0	0	0	0	0	0	0	0	0	0	0	0	0	298	0	0	0	0	0	0	0	0
Firmicutes	Clostridia	Clostridiales	unclassified_Clostridiales	uncultured_Bacillus_sp.	unclassified_Clostridiales	0	0	0	0	0	0	0	0	0	16	124	0	0	0	0	90	129	42	0	0	0	0	0	0	0	0	0	0	0	0	0	0	0	0
Firmicutes	Clostridia	Eubacteriales	Anaerofustaceae	Anaerofustis	unclassified_Anaerofustis	25	42	40	127	39	31	32	45	78	1	3	0	9	8	2	0	4	0	13	6	11	10	0	27	0	9	3	0	0	0	0	0	0	0
Firmicutes	Clostridia	Lachnospirales	Defluviitaleaceae	Defluviitaleaceae_UCG_011	unclassified_Defluviitaleaceae_UCG_011	67	55	73	65	115	82	100	119	88	102	27	57	76	73	69	43	52	0	120	80	137	36	102	126	45	98	103	0	0	0	30	85	93	18
Firmicutes	Clostridia	Lachnospirales	Lachnospiraceae	Acetitomaculum	unclassified_Acetitomaculum	0	40	30	0	0	0	0	0	0	0	0	0	0	0	0	0	0	0	0	0	0	0	0	0	0	0	0	201	409	315	201	367	354	420
Firmicutes	Clostridia	Lachnospirales	Lachnospiraceae	Agathobacter	unclassified_Agathobacter	173	673	587	0	172	0	0	91	0	0	0	0	0	0	0	0	0	0	0	56	0	75	114	0	0	59	279	0	0	0	0	0	0	0
Firmicutes	Clostridia	Lachnospirales	Lachnospiraceae	Anaerocolumna	unclassified_Anaerocolumna	0	0	0	0	0	0	0	0	0	0	37	237	123	247	223	0	0	67	0	0	0	0	0	0	0	0	0	0	0	0	0	0	0	0
Firmicutes	Clostridia	Lachnospirales	Lachnospiraceae	Anaerosporobacter	unclassified_Anaerosporobacter	0	101	136	0	86	0	21	0	0	30	0	74	0	0	0	71	0	32	90	141	185	264	117	0	166	286	197	0	0	0	0	0	0	0
Firmicutes	Clostridia	Lachnospirales	Lachnospiraceae	Anaerosporobacter	uncultured_Lachnospiraceae_bacterium	0	0	0	0	9	0	54	0	39	32	0	0	0	0	0	0	0	0	0	90	88	0	0	186	128	145	0	0	0	0	0	0	0	0
Firmicutes	Clostridia	Lachnospirales	Lachnospiraceae	Anaerosporobacter	uncultured_anaerobic_bacterium	0	0	0	0	0	0	0	0	0	0	130	0	0	0	0	0	0	0	0	0	0	0	0	0	0	109	0	0	0	0	0	0	0	0
Firmicutes	Clostridia	Lachnospirales	Lachnospiraceae	Blautia	unclassified_Blautia	130	479	200	55	272	61	193	88	73	0	20	0	0	0	0	0	0	48	16	0	33	26	48	32	28	49	58	15	0	19	24	42	18	11
Firmicutes	Clostridia	Lachnospirales	Lachnospiraceae	Cellulosilyticum	Cellulosilyticum_bacterium_PS7	0	0	0	0	0	0	0	0	0	0	0	0	0	0	0	0	0	0	21	40	48	0	65	23	130	44	198	0	0	0	0	0	0	0
Firmicutes	Clostridia	Lachnospirales	Lachnospiraceae	Cellulosilyticum	unclassified_Cellulosilyticum	0	0	10	0	0	0	19	0	25	3	4	199	67	71	43	0	0	0	222	141	235	99	164	134	368	80	364	21	0	0	30	0	0	0
Firmicutes	Clostridia	Lachnospirales	Lachnospiraceae	Coprococcus	unclassified_Coprococcus	0	93	25	0	63	39	0	48	57	83	116	198	65	68	79	0	41	46	24	14	22	82	41	296	73	145	77	0	0	32	86	0	64	0
Firmicutes	Clostridia	Lachnospirales	Lachnospiraceae	Coprococcus	uncultured_Lachnospiraceae_bacterium	0	0	0	0	120	0	0	0	0	0	40	73	0	0	0	0	24	111	28	33	124	0	0	99	0	0	0	0	0	0	0	0	27	0
Firmicutes	Clostridia	Lachnospirales	Lachnospiraceae	Dorea	unclassified_Dorea	0	0	263	0	282	0	155	0	0	0	0	0	0	0	0	0	0	0	0	0	0	0	0	0	0	0	0	0	0	0	0	0	0	0
Firmicutes	Clostridia	Lachnospirales	Lachnospiraceae	Dorea	uncultured_Lachnospiraceae_bacterium	469	65	0	328	0	101	0	335	78	24	72	26	46	27	33	61	130	161	0	29	35	24	75	61	25	55	0	103	125	39	134	74	112	61
Firmicutes	Clostridia	Lachnospirales	Lachnospiraceae	Frisingicoccus	unclassified_Frisingicoccus	266	309	0	256	147	77	183	197	231	0	35	18	0	0	0	35	19	29	15	91	23	194	183	0	188	122	224	0	16	12	0	0	0	0
Firmicutes	Clostridia	Lachnospirales	Lachnospiraceae	GCA_900066575	unclassified_GCA_900066575	13	107	46	0	21	0	0	24	0	0	0	0	0	0	0	0	0	0	0	0	0	0	0	0	0	0	0	0	0	0	0	0	0	0
Firmicutes	Clostridia	Lachnospirales	Lachnospiraceae	Lachnospiraceae_AC2044_group	unclassified_Lachnospiraceae_AC2044_group	0	44	0	0	0	0	0	66	64	0	0	0	0	0	0	0	0	0	0	0	0	85	0	0	36	70	49	0	0	0	0	0	0	0
Firmicutes	Clostridia	Lachnospirales	Lachnospiraceae	Lachnospiraceae_FE2018_group	Lachnospiraceae_FE2018_group_bacterium_FE2018	0	0	0	0	0	0	0	0	0	0	0	0	0	0	0	0	0	0	0	0	0	0	0	0	0	0	0	15	24	12	20	13	49	15
Firmicutes	Clostridia	Lachnospirales	Lachnospiraceae	Lachnospiraceae_NK3A20_group	unclassified_Lachnospiraceae_NK3A20_group	0	0	82	0	0	47	0	103	137	0	0	0	0	0	0	0	0	0	0	0	0	0	0	0	0	0	0	1665	690	502	970	374	1142	593
Firmicutes	Clostridia	Lachnospirales	Lachnospiraceae	Lachnospiraceae_NK4A136_group	uncultured_Lachnospiraceae_bacterium	0	0	0	0	0	0	0	0	0	0	0	0	0	0	0	0	0	0	0	0	0	0	0	0	0	0	0	0	0	58	147	67	35	0
Firmicutes	Clostridia	Lachnospirales	Lachnospiraceae	Lachnospiraceae_NK4B4_group	unclassified_Lachnospiraceae_NK4B4_group	0	0	0	0	0	0	0	0	0	0	0	0	0	0	0	11	0	23	38	57	0	0	16	10	0	35	0	0	0	0	0	0	0	0
Firmicutes	Clostridia	Lachnospirales	Lachnospiraceae	Lachnospiraceae_UCG_001	unclassified_Lachnospiraceae_UCG_001	0	0	150	0	0	0	0	0	0	0	0	0	0	0	0	0	0	0	0	0	0	0	0	0	0	0	0	0	0	0	0	0	0	0
Firmicutes	Clostridia	Lachnospirales	Lachnospiraceae	Lachnospiraceae_UCG_001	uncultured_Lachnospiraceae_bacterium	0	13	0	23	0	56	25	22	45	45	38	81	32	27	58	29	42	93	36	29	0	57	0	42	0	0	18	140	114	0	0	0	0	0
Firmicutes	Clostridia	Lachnospirales	Lachnospiraceae	Lachnospiraceae_UCG_002	uncultured_rumen_bacterium	0	0	0	0	0	0	0	0	0	0	0	0	0	0	0	0	0	0	0	0	0	0	0	0	0	0	0	74	61	37	38	0	0	0
Firmicutes	Clostridia	Lachnospirales	Lachnospiraceae	Lachnospiraceae_UCG_008	uncultured_Lachnospiraceae_bacterium	0	0	0	0	0	0	0	0	0	0	0	0	0	0	0	0	0	0	0	0	0	0	0	0	0	0	0	49	23	19	30	10	51	19
Firmicutes	Clostridia	Lachnospirales	Lachnospiraceae	Lachnospiraceae_UCG_010	unclassified_Lachnospiraceae_UCG_010	40	397	43	223	29	27	40	120	111	193	160	155	103	155	179	106	224	214	303	259	296	348	273	387	454	328	158	48	429	237	277	263	562	426
Firmicutes	Clostridia	Lachnospirales	Lachnospiraceae	Lachnospiraceae_XPB1014_group	unclassified_Lachnospiraceae_XPB1014_group	0	0	0	0	0	0	0	0	0	0	0	0	0	0	0	0	0	0	0	0	0	0	0	0	0	0	0	81	58	22	35	35	36	86
Firmicutes	Clostridia	Lachnospirales	Lachnospiraceae	Marvinbryantia	unclassified_Marvinbryantia	152	223	101	0	165	50	20	43	0	0	0	0	0	0	0	0	0	0	0	0	0	0	0	0	0	0	0	169	41	61	0	44	29	44
Firmicutes	Clostridia	Lachnospirales	Lachnospiraceae	Roseburia	Roseburia_sp._499	0	0	0	0	0	0	0	0	0	0	0	0	0	0	0	0	0	0	0	0	0	13	59	0	0	0	63	0	0	0	0	0	0	0
Firmicutes	Clostridia	Lachnospirales	Lachnospiraceae	Roseburia	unclassified_Roseburia	23	360	214	0	275	618	35	370	175	0	0	0	0	0	0	0	0	0	0	46	0	1193	63	0	48	0	1228	0	146	0	0	0	0	0
Firmicutes	Clostridia	Lachnospirales	Lachnospiraceae	Roseburia	uncultured_Lachnospiraceae_bacterium	141	84	0	216	16	46	0	8	0	0	0	0	41	0	0	0	0	0	179	42	0	13	103	0	134	220	79	0	0	0	0	0	0	0
Firmicutes	Clostridia	Lachnospirales	Lachnospiraceae	Shuttleworthia	unclassified_Shuttleworthia	0	0	0	0	0	0	0	0	0	0	0	0	0	0	0	0	0	0	0	0	0	0	0	0	0	0	0	95	30	0	24	11	35	0
Firmicutes	Clostridia	Lachnospirales	Lachnospiraceae	Syntrophococcus	unclassified_Syntrophococcus	0	0	0	0	0	0	0	0	0	0	0	0	0	0	0	0	0	0	0	0	0	0	0	0	0	0	0	236	110	72	93	63	0	78
Firmicutes	Clostridia	Lachnospirales	Lachnospiraceae	Tuzzerella	unclassified_Tuzzerella	0	10	0	0	0	9	0	9	0	15	0	0	0	14	0	7	0	26	29	29	24	0	25	22	50	32	10	0	0	0	11	0	0	26
Firmicutes	Clostridia	Lachnospirales	Lachnospiraceae	XBB1006	unclassified_XBB1006	0	0	0	0	0	0	0	0	0	0	0	0	11	18	0	0	0	0	0	24	0	0	0	89	0	0	0	0	0	18	24	0	197	56
Firmicutes	Clostridia	Lachnospirales	Lachnospiraceae	[Bacteroides]_pectinophilus_group	uncultured_rumen_bacterium	0	190	0	0	0	0	0	0	0	0	0	0	0	0	0	0	0	0	0	0	0	0	0	0	0	0	0	0	0	0	0	0	0	0
Firmicutes	Clostridia	Lachnospirales	Lachnospiraceae	[Eubacterium]_hallii_group	unclassified_[Eubacterium]_hallii_group	0	0	0	0	14	0	0	0	0	0	0	0	0	0	0	0	0	0	0	0	0	0	0	0	0	0	0	107	55	40	55	27	82	53
Firmicutes	Clostridia	Lachnospirales	Lachnospiraceae	[Eubacterium]_hallii_group	unidentified_rumen_bacterium_RF24	0	0	0	0	0	0	0	0	0	0	0	0	0	0	0	0	0	0	0	0	0	0	0	0	0	0	0	83	36	34	24	40	28	28
Firmicutes	Clostridia	Lachnospirales	Lachnospiraceae	[Eubacterium]_ruminantium_group	unclassified_[Eubacterium]_ruminantium_group	24	0	0	0	23	0	0	0	0	0	0	0	0	0	0	0	0	0	28	30	37	38	151	0	11	21	22	53	128	293	109	394	27	90
Firmicutes	Clostridia	Lachnospirales	Lachnospiraceae	[Eubacterium]_ventriosum_group	uncultured_rumen_bacterium	0	0	0	0	0	39	0	42	0	0	0	0	0	0	0	0	0	0	0	0	0	0	0	0	0	0	0	0	0	0	0	0	0	0
Firmicutes	Clostridia	Lachnospirales	Lachnospiraceae	[Ruminococcus]_gauvreauii_group	uncultured_rumen_bacterium	0	0	0	0	0	0	0	0	0	0	0	0	0	0	0	0	0	0	0	0	0	0	0	0	0	0	0	310	121	101	178	116	66	100
Firmicutes	Clostridia	Lachnospirales	Lachnospiraceae	unclassified_Lachnospiraceae	unclassified_Lachnospiraceae	4010	10308	7726	2880	6813	4336	3288	7524	5037	1658	1613	2371	1063	1167	1215	1170	1043	2724	3829	5004	3768	8351	5318	3016	5299	5607	9164	3387	4282	3409	5053	4242	5771	4053
Firmicutes	Clostridia	Lachnospirales	Lachnospiraceae	unclassified_Lachnospiraceae	uncultured_prokaryote	0	0	0	0	0	0	0	0	0	0	0	0	0	0	0	0	0	0	0	0	0	0	0	0	0	559	0	0	0	0	0	0	0	0
Firmicutes	Clostridia	Monoglobales	Monoglobaceae	Monoglobus	unclassified_Monoglobus	536	369	483	1212	247	1215	771	844	829	803	650	330	217	274	227	126	167	283	1641	1038	1919	1904	1510	1728	1799	1937	1655	610	1059	2646	2228	2133	1421	3090
Firmicutes	Clostridia	Monoglobales	Monoglobaceae	Monoglobus	uncultured_Clostridiales_bacterium	0	0	0	0	0	12	0	33	0	0	0	16	0	0	0	17	0	0	0	65	34	25	37	55	0	0	0	48	0	169	45	46	21	37
Firmicutes	Clostridia	Monoglobales	Monoglobaceae	Monoglobus	uncultured_Firmicutes_bacterium	104	0	0	0	0	0	0	12	0	0	0	0	17	0	0	0	0	130	166	97	148	87	130	125	0	0	0	0	13	99	77	82	80	85
Firmicutes	Clostridia	Oscillospirales	Butyricicoccaceae	UCG_009	unclassified_UCG_009	325	244	298	406	448	429	599	304	893	310	405	247	401	528	462	245	321	438	802	937	1027	498	529	954	603	470	405	59	126	139	243	255	330	181
Firmicutes	Clostridia	Oscillospirales	Ethanoligenenaceae	Incertae_Sedis	unclassified_Incertae_Sedis	0	0	0	0	0	0	0	0	12	0	0	0	0	0	3	0	0	0	11	9	0	0	0	10	0	0	0	255	64	135	115	161	73	129
Firmicutes	Clostridia	Oscillospirales	Hungateiclostridiaceae	Ruminiclostridium	unclassified_Ruminiclostridium	0	0	0	0	0	0	0	0	0	0	0	0	0	0	0	0	0	0	0	0	0	0	0	0	0	0	0	29	4	72	51	59	15	0
Firmicutes	Clostridia	Oscillospirales	Hungateiclostridiaceae	Saccharofermentans	unclassified_Saccharofermentans	94	247	58	309	173	149	75	380	378	0	0	0	44	0	0	0	0	0	80	59	132	67	91	494	0	45	60	0	0	0	0	5	0	0
Firmicutes	Clostridia	Oscillospirales	Hungateiclostridiaceae	Saccharofermentans	unidentified_rumen_bacterium_RFN72	0	0	0	24	27	0	0	35	63	0	0	0	0	0	0	0	0	0	0	0	0	0	0	0	0	0	0	0	0	0	0	0	0	0
Firmicutes	Clostridia	Oscillospirales	Hungateiclostridiaceae	unclassified_Hungateiclostridiaceae	unclassified_Hungateiclostridiaceae	76	33	15	39	45	83	153	22	172	17	11	20	34	103	61	36	0	9	81	168	78	37	14	38	32	50	53	178	96	268	53	196	212	161
Firmicutes	Clostridia	Oscillospirales	Hydrogenoanaerobacterium	unclassified_Hydrogenoanaerobacterium	unclassified_Hydrogenoanaerobacterium	18	7	9	0	0	0	2	0	0	0	24	0	34	15	0	0	10	0	27	19	35	11	0	26	21	0	9	0	5	9	0	0	0	0
Firmicutes	Clostridia	Oscillospirales	Oscillospiraceae	NK4A214_group	unclassified_NK4A214_group	584	508	242	735	152	502	365	453	561	209	251	167	234	304	303	254	326	293	565	598	354	247	390	640	353	377	221	732	1186	858	1093	854	1137	862
Firmicutes	Clostridia	Oscillospirales	Oscillospiraceae	NK4A214_group	uncultured_Ruminococcaceae_bacterium	0	0	0	0	0	0	0	0	141	0	0	0	0	0	0	0	0	0	0	0	0	0	0	0	0	0	0	0	0	0	0	0	0	0
Firmicutes	Clostridia	Oscillospirales	Oscillospiraceae	Oscillibacter	unclassified_Oscillibacter	94	256	382	0	234	94	147	0	0	26	0	16	28	46	26	0	0	75	135	105	209	149	102	137	144	149	79	33	239	93	79	46	142	42
Firmicutes	Clostridia	Oscillospirales	Oscillospiraceae	Oscillospira	unclassified_Oscillospira	0	0	0	0	0	0	0	0	42	0	33	0	39	41	27	0	0	0	30	32	0	0	0	0	0	0	0	0	0	0	0	0	0	0
Firmicutes	Clostridia	Oscillospirales	Oscillospiraceae	Papillibacter	unclassified_Papillibacter	0	46	24	73	0	27	60	61	96	31	29	34	26	55	32	0	0	0	0	40	40	30	44	95	24	28	25	105	162	122	140	154	97	84
Firmicutes	Clostridia	Oscillospirales	Oscillospiraceae	UCG_002	unclassified_UCG_002	456	44	137	477	112	372	588	34	584	188	138	33	131	248	143	112	124	210	536	489	345	276	315	571	541	252	217	1305	1681	476	592	461	1206	723
Firmicutes	Clostridia	Oscillospirales	Oscillospiraceae	UCG_005	unclassified_UCG_005	11782	12061	11899	9594	9450	10931	8718	10029	11054	3763	3866	3935	3131	3704	4029	3552	3161	4519	5499	5624	6276	7229	6553	6577	5787	5625	5182	5478	6801	6466	7425	7215	6543	7430
Firmicutes	Clostridia	Oscillospirales	Oscillospiraceae	UCG_005	uncultured_Ruminococcaceae_bacterium	0	168	276	134	0	117	221	176	547	95	293	96	171	147	106	116	329	447	320	194	468	454	212	635	352	563	541	41	62	122	83	188	0	34
Firmicutes	Clostridia	Oscillospirales	Oscillospiraceae	UCG_005	uncultured_rumen_bacterium	0	0	0	180	0	0	0	0	144	16	38	23	26	77	47	41	23	27	155	70	34	100	49	94	0	0	0	25	0	0	31	0	0	70
Firmicutes	Clostridia	Oscillospirales	Oscillospiraceae	UCG_007	unclassified_UCG_007	0	0	0	0	0	0	0	0	0	0	0	0	0	0	0	0	0	0	0	0	0	0	0	0	0	0	0	0	73	132	0	110	0	0
Firmicutes	Clostridia	Oscillospirales	Oscillospiraceae	unclassified_Oscillospiraceae	unclassified_Oscillospiraceae	398	503	245	729	281	465	399	577	590	486	438	606	449	353	537	374	388	433	1037	880	866	1015	965	1600	1118	998	765	188	471	289	504	324	801	671
Firmicutes	Clostridia	Oscillospirales	Oscillospiraceae	unclassified_Oscillospiraceae	uncultured_Ruminococcaceae_bacterium	0	0	0	17	0	0	58	47	15	208	14	12	17	0	0	200	279	253	68	46	43	0	24	36	1	0	0	0	0	0	0	0	0	0
Firmicutes	Clostridia	Oscillospirales	Ruminococcaceae	Candidatus_Soleaferrea	unclassified_Candidatus_Soleaferrea	141	60	0	77	33	370	254	0	230	104	96	66	148	135	114	97	135	108	120	150	194	38	141	378	232	226	177	33	155	188	206	195	134	118
Firmicutes	Clostridia	Oscillospirales	Ruminococcaceae	Candidatus_Soleaferrea	uncultured_Acetanaerobacterium_sp.	33	0	0	0	0	0	66	0	0	21	0	0	0	0	0	0	16	0	0	0	4	12	0	0	0	0	31	0	0	0	0	0	0	0
Firmicutes	Clostridia	Oscillospirales	Ruminococcaceae	Candidatus_Soleaferrea	uncultured_Anaerotruncus_sp.	32	32	13	5	17	23	14	40	23	13	15	24	5	14	8	0	11	10	9	14	19	25	21	29	15	12	0	0	23	0	11	0	14	15
Firmicutes	Clostridia	Oscillospirales	Ruminococcaceae	Caproiciproducens	unclassified_Caproiciproducens	24	0	0	0	35	32	14	0	8	30	0	26	37	23	15	0	19	31	0	26	0	11	6	24	20	0	7	0	0	0	0	0	0	0
Firmicutes	Clostridia	Oscillospirales	Ruminococcaceae	Fournierella	uncultured_Firmicutes_bacterium	0	51	25	0	0	0	0	49	0	0	0	0	0	0	0	0	14	0	0	0	0	61	0	0	0	0	0	0	0	0	0	0	0	0
Firmicutes	Clostridia	Oscillospirales	Ruminococcaceae	Incertae_Sedis	unclassified_Incertae_Sedis	15	85	22	0	50	145	76	18	99	19	77	101	53	92	82	28	82	80	79	88	76	85	72	68	73	8	128	60	129	147	87	163	126	154
Firmicutes	Clostridia	Oscillospirales	Ruminococcaceae	Negativibacillus	unclassified_Negativibacillus	41	108	0	203	51	24	79	87	161	0	30	0	0	19	26	28	23	162	0	0	8	0	24	84	0	0	0	0	0	0	0	0	0	0
Firmicutes	Clostridia	Oscillospirales	Ruminococcaceae	Paludicola	unclassified_Paludicola	0	0	37	0	44	21	65	95	59	0	0	0	0	15	0	0	0	0	0	0	34	0	0	0	25	0	0	0	0	16	77	14	0	36
Firmicutes	Clostridia	Oscillospirales	Ruminococcaceae	Pygmaiobacter	unclassified_Pygmaiobacter	11	38	0	28	18	0	17	0	20	30	15	32	0	18	21	13	25	0	0	0	29	0	59	0	24	25	34	21	15	29	29	22	0	12
Firmicutes	Clostridia	Oscillospirales	Ruminococcaceae	Ruminococcus	Ruminococcus_sp.	0	78	231	52	192	0	0	41	0	38	0	23	0	0	0	0	0	0	28	44	0	71	0	0	27	21	0	0	0	0	0	0	0	0
Firmicutes	Clostridia	Oscillospirales	Ruminococcaceae	Ruminococcus	Ruminococcus_sp._N15.MGS_57	33	0	0	0	0	0	0	0	0	0	0	0	0	33	24	26	24	0	0	0	0	0	0	0	0	0	0	0	17	0	0	0	0	0
Firmicutes	Clostridia	Oscillospirales	Ruminococcaceae	Ruminococcus	unclassified_Ruminococcus	390	531	218	28	299	83	132	329	148	32	75	16	14	58	12	83	18	117	149	101	292	73	126	0	21	47	26	148	348	983	452	1366	1738	1254
Firmicutes	Clostridia	Oscillospirales	Ruminococcaceae	Ruminococcus	uncultured_Ruminococcus_sp.	0	0	0	0	0	0	0	0	0	0	0	0	0	0	0	0	0	0	16	0	0	22	0	0	0	0	0	0	32	140	146	159	49	63
Firmicutes	Clostridia	Oscillospirales	Ruminococcaceae	Subdoligranulum	unclassified_Subdoligranulum	0	53	60	0	0	0	0	0	0	0	0	0	0	0	0	0	0	0	0	0	0	0	0	0	0	0	0	0	0	0	0	0	0	0
Firmicutes	Clostridia	Oscillospirales	Ruminococcaceae	UCG_001	unclassified_UCG_001	36	0	20	0	0	0	0	0	0	23	0	0	0	7	0	17	0	0	0	0	0	0	0	0	0	0	0	0	0	6	0	17	0	0
Firmicutes	Clostridia	Oscillospirales	Ruminococcaceae	[Eubacterium]_siraeum_group	unclassified_[Eubacterium]_siraeum_group	0	8	5	0	68	0	10	4	0	11	0	0	0	27	14	22	19	0	0	0	0	0	0	14	0	0	3	11	293	219	300	281	599	263
Firmicutes	Clostridia	Oscillospirales	Ruminococcaceae	unclassified_Ruminococcaceae	Ruminococcus_sp._YE281	90	0	0	0	0	0	25	205	14	26	0	0	0	0	0	0	0	0	0	0	0	0	0	0	0	0	0	0	0	0	0	0	0	0
Firmicutes	Clostridia	Oscillospirales	Ruminococcaceae	unclassified_Ruminococcaceae	unclassified_Ruminococcaceae	611	265	643	1147	1345	867	1008	1218	1384	349	234	249	337	309	385	208	236	372	433	824	602	318	409	976	577	451	405	1134	730	1415	1222	1465	1220	1111
Firmicutes	Clostridia	Oscillospirales	Ruminococcaceae	unclassified_Ruminococcaceae	uncultured_Ruminococcaceae_bacterium	0	206	80	48	47	62	85	118	187	91	192	134	154	157	90	73	156	219	236	167	184	120	158	195	263	38	186	95	265	22	34	57	42	84
Firmicutes	Clostridia	Oscillospirales	Ruminococcaceae	unclassified_Ruminococcaceae	uncultured_rumen_bacterium	12	96	24	0	0	0	0	0	28	0	0	0	0	0	0	0	0	0	17	0	21	0	0	49	0	0	18	0	0	0	0	0	0	0
Firmicutes	Clostridia	Oscillospirales	Ruminococcaceae	uncultured_Ruminococcaceae_bacterium	uncultured_Ruminococcaceae_bacterium	0	0	0	0	0	0	0	0	0	0	0	0	0	0	0	0	0	0	0	0	0	0	0	0	0	0	0	103	101	1064	165	718	154	302
Firmicutes	Clostridia	Oscillospirales	UCG_010	unclassified_UCG_010	unclassified_UCG_010	2898	1859	1913	2815	2559	2942	2986	2509	3315	2395	3358	2222	2790	3192	2691	1671	1689	3458	2205	2342	2392	1929	1752	2430	2454	1385	1660	532	614	1156	1373	1121	1046	1194
Firmicutes	Clostridia	Oscillospirales	UCG_010	uncultured_Ruminococcaceae_bacterium	uncultured_Ruminococcaceae_bacterium	254	67	81	143	138	144	124	175	98	375	232	216	230	328	253	335	180	191	0	0	43	142	92	70	82	86	70	16	0	0	0	0	0	68
Firmicutes	Clostridia	Oscillospirales	[Eubacterium]_coprostanoligenes_group	Clostridiales_bacterium_42_27	unclassified_Clostridiales_bacterium_42_27	0	0	0	0	0	0	0	0	0	0	0	0	0	0	0	0	0	0	0	0	0	0	0	0	0	0	0	68	26	51	0	75	60	0
Firmicutes	Clostridia	Oscillospirales	[Eubacterium]_coprostanoligenes_group	unclassified_[Eubacterium]_coprostanoligenes_group	unclassified_[Eubacterium]_coprostanoligenes_group	2676	1472	2961	2562	1790	2623	3070	2241	2229	1171	1479	934	836	1130	1115	791	863	1717	3492	3323	3213	2642	3379	4100	3392	2753	2209	6122	3361	4355	7360	4446	4598	2953
Firmicutes	Clostridia	Oscillospirales	[Eubacterium]_coprostanoligenes_group	uncultured_Clostridium_sp.	uncultured_Clostridium_sp.	136	269	153	35	25	19	3	25	64	122	74	0	49	74	58	40	24	71	143	191	207	369	78	0	145	282	140	168	271	671	871	547	195	120
Firmicutes	Clostridia	Oscillospirales	[Eubacterium]_coprostanoligenes_group	uncultured_Ruminococcaceae_bacterium	uncultured_Ruminococcaceae_bacterium	47	44	135	0	0	98	21	0	88	74	85	110	44	23	26	120	51	34	160	102	168	274	172	5	68	136	168	0	0	0	0	0	0	0
Firmicutes	Clostridia	Oscillospirales	[Eubacterium]_coprostanoligenes_group	uncultured_rumen_bacterium	uncultured_rumen_bacterium	0	0	0	0	0	0	0	49	0	0	0	0	0	0	0	0	0	0	0	58	0	18	0	0	0	0	0	0	0	0	0	0	0	0
Firmicutes	Clostridia	Oscillospirales	unclassified_Oscillospirales	unclassified_Oscillospirales	unclassified_Oscillospirales	436	171	170	718	752	599	722	1162	352	150	126	43	74	117	168	133	131	107	830	396	999	311	808	493	231	255	472	443	295	856	503	834	638	537
Firmicutes	Clostridia	Peptococcales	Peptococcaceae	Peptococcus	unclassified_Peptococcus	0	0	0	0	0	0	0	0	0	0	0	0	0	0	0	0	0	0	0	0	0	0	0	0	0	183	0	0	0	0	0	0	0	0
Firmicutes	Clostridia	Peptococcales	Peptococcaceae	unclassified_Peptococcaceae	unclassified_Peptococcaceae	12	53	0	0	0	31	9	0	31	85	133	166	69	132	96	117	104	37	205	307	357	253	72	441	203	103	146	15	25	49	59	53	84	46
Firmicutes	Clostridia	Peptostreptococcales_Tissierellales	Alkaliphilus	unclassified_Alkaliphilus	unclassified_Alkaliphilus	0	0	0	0	0	0	0	0	0	0	0	0	45	42	241	0	0	0	0	0	0	0	0	0	0	0	0	0	0	0	0	0	0	0
Firmicutes	Clostridia	Peptostreptococcales_Tissierellales	Anaerovoracaceae	Amnipila	unclassified_Amnipila	0	0	0	0	0	0	0	0	0	0	0	0	0	0	0	0	0	0	0	0	0	0	0	0	0	0	0	0	39	36	19	36	11	41
Firmicutes	Clostridia	Peptostreptococcales_Tissierellales	Anaerovoracaceae	Anaerovorax	unclassified_Anaerovorax	18	24	0	72	11	43	20	33	29	17	52	0	0	21	20	10	0	13	63	51	93	48	41	137	66	45	36	15	0	0	0	0	16	16
Firmicutes	Clostridia	Peptostreptococcales_Tissierellales	Anaerovoracaceae	Family_XIII_AD3011_group	unclassified_Family_XIII_AD3011_group	0	0	0	201	93	153	20	155	299	97	88	30	47	96	92	41	124	174	148	177	147	38	97	315	244	104	82	760	998	181	582	167	739	645
Firmicutes	Clostridia	Peptostreptococcales_Tissierellales	Anaerovoracaceae	Family_XIII_AD3011_group	uncultured_Clostridiales_Family_XIII_bacterium	58	42	21	114	79	56	120	71	82	80	58	87	100	97	77	38	49	0	69	53	123	66	46	122	55	0	18	107	92	67	107	0	72	0
Firmicutes	Clostridia	Peptostreptococcales_Tissierellales	Anaerovoracaceae	Family_XIII_AD3011_group	uncultured_rumen_bacterium	0	0	0	0	0	0	0	0	0	0	0	0	0	0	0	0	0	0	0	0	0	0	0	22	0	0	0	69	0	0	28	13	28	26
Firmicutes	Clostridia	Peptostreptococcales_Tissierellales	Anaerovoracaceae	Family_XIII_UCG_001	unclassified_Family_XIII_UCG_001	0	0	0	0	0	0	0	0	0	0	0	0	0	0	0	0	0	0	0	0	0	0	0	0	0	0	0	0	51	14	0	0	13	41
Firmicutes	Clostridia	Peptostreptococcales_Tissierellales	Anaerovoracaceae	Family_XIII_UCG_001	uncultured_rumen_bacterium	0	0	0	0	0	0	0	0	0	0	0	0	0	0	0	0	0	0	0	0	0	0	0	0	0	0	0	208	66	76	66	83	30	58
Firmicutes	Clostridia	Peptostreptococcales_Tissierellales	Anaerovoracaceae	Mogibacterium	unclassified_Mogibacterium	0	0	0	0	0	0	0	0	0	0	0	0	0	0	0	0	0	0	0	0	0	0	0	0	0	0	0	157	0	0	24	0	124	0
Firmicutes	Clostridia	Peptostreptococcales_Tissierellales	Anaerovoracaceae	Mogibacterium	uncultured_rumen_bacterium	0	54	32	106	0	62	0	0	130	4	0	0	18	0	0	0	0	0	17	0	0	9	0	0	0	10	0	197	130	115	181	46	206	0
Firmicutes	Clostridia	Peptostreptococcales_Tissierellales	Anaerovoracaceae	[Eubacterium]_brachy_group	unclassified_[Eubacterium]_brachy_group	47	72	71	117	54	173	97	154	196	42	57	49	0	0	0	0	37	0	0	0	0	0	0	0	0	54	0	417	109	107	107	62	0	28
Firmicutes	Clostridia	Peptostreptococcales_Tissierellales	Anaerovoracaceae	[Eubacterium]_nodatum_group	unclassified_[Eubacterium]_nodatum_group	0	0	0	39	8	35	23	0	23	0	45	0	33	27	0	17	52	0	34	9	25	0	29	72	41	0	20	66	163	0	34	48	366	78
Firmicutes	Clostridia	Peptostreptococcales_Tissierellales	Anaerovoracaceae	unclassified_Anaerovoracaceae	unclassified_Anaerovoracaceae	0	0	0	11	0	15	12	12	0	0	0	0	8	10	13	0	0	5	56	11	30	0	30	34	0	21	0	158	128	57	103	59	119	128
Firmicutes	Clostridia	Peptostreptococcales_Tissierellales	Family_XI	Tissierella	unclassified_Tissierella	0	0	0	0	0	0	0	0	0	0	203	0	0	0	0	136	886	30	0	0	0	0	0	0	0	388	0	0	0	0	0	0	0	0
Firmicutes	Clostridia	Peptostreptococcales_Tissierellales	Family_XI	Tissierella	uncultured_Tissierella_sp.	0	2	0	68	0	0	0	0	0	0	0	0	0	0	0	0	29	0	0	0	0	0	0	0	0	32	0	0	0	0	0	0	0	0
Firmicutes	Clostridia	Peptostreptococcales_Tissierellales	Guggenheimella	unclassified_Guggenheimella	unclassified_Guggenheimella	0	0	0	0	0	0	0	0	0	0	0	0	0	0	0	0	5	0	0	0	0	0	0	0	0	142	0	0	0	0	0	0	0	0
Firmicutes	Clostridia	Peptostreptococcales_Tissierellales	Peptostreptococcaceae	Paeniclostridium	unclassified_Paeniclostridium	73	261	587	67	328	65	393	0	137	151	33	39	175	153	84	233	123	205	50	108	90	57	104	207	145	75	65	0	0	0	0	0	0	0
Firmicutes	Clostridia	Peptostreptococcales_Tissierellales	Peptostreptococcaceae	Romboutsia	unclassified_Romboutsia	205	523	1008	298	701	222	994	139	450	119	51	134	123	121	77	131	63	123	156	321	245	252	280	318	326	204	174	106	63	145	39	82	0	10
Firmicutes	Clostridia	Peptostreptococcales_Tissierellales	Peptostreptococcaceae	unclassified_Peptostreptococcaceae	unclassified_Peptostreptococcaceae	0	74	115	42	67	0	57	33	51	0	0	20	0	31	0	0	0	0	0	49	34	51	41	45	33	36	0	74	36	104	109	77	19	0
Firmicutes	Clostridia	Peptostreptococcales_Tissierellales	Sedimentibacteraceae	Sedimentibacter	unclassified_Sedimentibacter	0	0	0	0	0	0	0	0	0	35	19	24	53	117	57	16	0	28	0	0	0	0	0	0	0	151	0	0	0	0	0	0	0	0
Firmicutes	Clostridia	unclassified_Clostridia	unclassified_Clostridia	unclassified_Clostridia	unclassified_Clostridia	243	58	183	651	267	439	996	518	412	179	259	73	165	196	152	46	144	257	890	731	745	349	618	474	667	709	349	561	537	1427	899	1471	1265	1247
Firmicutes	Clostridia	unclassified_Clostridia	uncultured_rumen_bacterium	unclassified_Clostridia	unclassified_Clostridia	0	0	0	0	0	31	0	0	0	0	0	0	0	0	0	0	0	9	16	38	0	0	0	49	0	0	0	0	21	9	0	0	37	0
Firmicutes	Clostridia	unclassified_Clostridia	uncultured_rumen_bacterium_4C0d_17	unclassified_Clostridia	unclassified_Clostridia	16	0	0	0	0	0	0	0	0	0	0	0	0	0	0	0	0	0	0	34	0	12	22	0	33	0	0	0	6	33	0	0	0	0
Firmicutes	Negativicutes	Acidaminococcales	Acidaminococcaceae	Phascolarctobacterium	unclassified_Phascolarctobacterium	0	0	0	0	0	0	0	0	0	0	33	0	0	34	0	37	0	0	198	299	0	0	280	254	0	116	0	0	0	0	0	0	0	0
Firmicutes	Negativicutes	Acidaminococcales	Acidaminococcaceae	Phascolarctobacterium	uncultured_Veillonellaceae_bacterium	58	129	147	70	52	51	44	38	96	433	253	371	264	270	327	368	387	327	300	132	394	409	232	277	423	422	448	45	38	48	33	16	87	79
Firmicutes	Negativicutes	Veillonellales_Selenomonadales	Selenomonadaceae	Anaerovibrio	unclassified_Anaerovibrio	0	488	110	0	20	114	0	0	0	19	8	12	0	0	3	0	0	8	83	70	10	209	350	0	167	29	209	0	0	0	0	0	0	0
Firmicutes	Negativicutes	Veillonellales_Selenomonadales	Selenomonadaceae	Quinella	unclassified_Quinella	0	0	0	0	0	0	0	0	0	0	0	0	0	0	0	0	0	0	73	54	18	90	24	0	31	70	117	0	0	0	0	0	0	0
Patescibacteria	Saccharimonadia	Saccharimonadales	Saccharimonadaceae	Candidatus_Saccharimonas	unclassified_Candidatus_Saccharimonas	0	0	0	0	0	0	0	0	22	0	0	0	0	0	0	0	0	0	0	0	0	0	0	0	0	0	0	497	304	298	235	253	139	204
Patescibacteria	Saccharimonadia	Saccharimonadales	Saccharimonadaceae	Candidatus_Saccharimonas	uncultured_rumen_bacterium	378	264	643	981	553	437	337	698	609	45	90	66	52	44	46	0	45	0	111	232	168	126	415	91	113	159	113	2757	1725	512	1331	482	570	755
Proteobacteria	Alphaproteobacteria	Acetobacterales	Acetobacteraceae	Acetobacter	unclassified_Acetobacter	0	32	0	0	6	0	0	0	46	0	0	0	0	0	0	0	0	9	20	0	0	0	21	0	28	0	17	13	0	12	18	0	0	35
Proteobacteria	Alphaproteobacteria	Rhizobiales	Devosiaceae	Pelagibacterium	unclassified_Pelagibacterium	0	0	0	0	0	0	0	0	0	18	35	17	0	0	0	0	22	17	0	0	0	0	0	0	0	0	0	0	0	0	0	0	0	0
Proteobacteria	Alphaproteobacteria	Rhizobiales	Rhizobiaceae	unclassified_Rhizobiaceae	unclassified_Rhizobiaceae	55	5	0	45	0	0	0	46	9	0	0	0	0	0	0	0	0	0	0	0	0	0	14	0	0	0	0	0	0	0	0	0	0	0
Proteobacteria	Alphaproteobacteria	Rhodobacterales	Rhodobacteraceae	unclassified_Rhodobacteraceae	unclassified_Rhodobacteraceae	0	0	0	0	0	0	0	0	0	0	0	0	0	0	0	0	0	0	0	0	0	0	0	0	0	0	0	211	74	0	0	0	0	0
Proteobacteria	Alphaproteobacteria	Rhodospirillales	unclassified_Rhodospirillales	unclassified_Rhodospirillales	unclassified_Rhodospirillales	0	0	0	0	0	0	0	0	0	0	0	0	0	0	0	0	0	0	0	116	0	0	0	0	0	0	0	0	0	0	0	0	0	0
Proteobacteria	Alphaproteobacteria	Rhodospirillales	unclassified_Rhodospirillales	uncultured_rumen_bacterium	unclassified_Rhodospirillales	0	0	0	0	0	0	0	0	0	55	0	0	0	0	0	0	0	0	0	149	0	0	0	0	21	34	0	0	0	0	0	0	0	0
Proteobacteria	Alphaproteobacteria	Rhodospirillales	unclassified_Rhodospirillales	unidentified_rumen_bacterium_RF32	unclassified_Rhodospirillales	87	0	20	52	0	138	83	21	68	11	17	0	0	27	35	20	0	29	138	88	40	60	45	197	41	33	0	0	0	0	0	0	0	45
Proteobacteria	Alphaproteobacteria	Rickettsiales	Mitochondria	unclassified_Mitochondria	unclassified_Mitochondria	0	0	0	0	0	0	0	0	0	0	0	0	1	30	71	14	0	1	0	0	0	0	0	0	0	0	0	65	34	49	95	55	0	17
Proteobacteria	Gammaproteobacteria	Burkholderiales	Comamonadaceae	Comamonas	unclassified_Comamonas	0	0	0	0	0	0	0	0	0	1372	713	1854	1820	0	29	643	141	844	0	0	0	0	0	0	0	0	0	0	0	0	0	0	0	0
Proteobacteria	Gammaproteobacteria	Burkholderiales	Comamonadaceae	unclassified_Comamonadaceae	unclassified_Comamonadaceae	0	0	0	0	0	0	0	0	0	44	148	0	19	0	0	0	14	23	0	0	0	0	0	0	0	0	0	0	0	0	0	0	0	0
Proteobacteria	Gammaproteobacteria	Burkholderiales	Sutterellaceae	Parasutterella	uncultured_Burkholderiales_bacterium	4	0	2	0	2	0	0	0	0	152	51	76	31	37	49	123	98	152	20	24	27	0	23	25	20	13	3	0	0	0	0	0	0	0
Proteobacteria	Gammaproteobacteria	Burkholderiales	Sutterellaceae	Sutterella	unclassified_Sutterella	0	0	0	0	0	0	0	0	0	0	0	0	0	0	7	0	19	54	11	0	36	0	0	2	35	5	31	0	0	0	0	0	0	0
Proteobacteria	Gammaproteobacteria	Enterobacterales	Enterobacteriaceae	Escherichia_Shigella	unclassified_Escherichia_Shigella	553	275	664	164	201	189	139	50	238	127	10	835	206	170	319	4	32	100	14	9	277	0	16	0	11	39	0	0	0	0	6	0	0	0
Proteobacteria	Gammaproteobacteria	Enterobacterales	Shewanellaceae	Shewanella	Shewanella_morhuae	0	0	0	0	0	0	0	0	0	58	0	33	46	0	0	0	0	0	0	0	0	0	0	0	0	0	0	0	0	0	0	0	0	0
Proteobacteria	Gammaproteobacteria	Enterobacterales	Succinivibrionaceae	Ruminobacter	uncultured_Ruminobacter_sp.	0	7	0	0	0	1	0	1	3	268	68	86	0	4	41	12	5	34	16	8	43	0	26	26	51	170	113	0	0	0	0	0	0	0
Proteobacteria	Gammaproteobacteria	Enterobacterales	Succinivibrionaceae	Succinivibrio	unclassified_Succinivibrio	0	0	0	0	0	0	0	0	0	0	0	0	0	0	0	0	0	0	346	0	0	0	58	0	98	132	979	0	0	0	0	0	0	0
Proteobacteria	Gammaproteobacteria	Enterobacterales	Succinivibrionaceae	Succinivibrio	uncultured_Succinivibrio_sp.	194	1287	3115	0	198	603	0	18	86	10	8	24	0	3	4	0	0	25	784	390	369	1399	1118	17	889	772	665	0	0	0	0	1	0	0
Proteobacteria	Gammaproteobacteria	Pseudomonadales	Cellvibrionaceae	Aestuariicella	unclassified_Aestuariicella	0	0	0	0	0	0	0	0	0	0	59	0	78	0	0	17	105	26	0	0	0	0	0	0	0	10	0	0	0	0	0	0	0	0
Proteobacteria	Gammaproteobacteria	Pseudomonadales	Halomonadaceae	Halomonas	unclassified_Halomonas	0	8	0	1036	0	13	20	0	0	0	0	0	0	0	0	0	0	0	0	0	0	0	0	0	0	5	0	0	0	0	0	0	0	0
Proteobacteria	Gammaproteobacteria	Pseudomonadales	Halomonadaceae	Marinospirillum	Marinospirillum_minutulum	0	0	0	0	0	0	0	0	0	0	549	0	0	0	0	580	1226	35	0	0	0	0	0	0	0	11	0	0	0	0	0	0	0	0
Proteobacteria	Gammaproteobacteria	Pseudomonadales	Moraxellaceae	Acinetobacter	unclassified_Acinetobacter	0	0	0	0	0	0	0	0	0	7975	1755	6195	10086	7791	9571	15509	3632	7221	0	0	1	0	0	0	0	42	0	370	83	0	0	0	0	0
Proteobacteria	Gammaproteobacteria	Pseudomonadales	Moraxellaceae	Psychrobacter	unclassified_Psychrobacter	1	0	0	0	0	0	0	0	0	3643	6090	628	2019	93	1749	8610	3001	1436	0	0	0	0	0	0	0	533	0	0	0	0	0	0	0	0
Proteobacteria	Gammaproteobacteria	Pseudomonadales	Pseudomonadaceae	Pseudomonas	Denitrificimonas_caeni	0	0	0	0	0	0	0	0	0	0	0	0	0	0	0	0	294	0	0	0	0	0	0	0	0	0	0	0	0	0	0	0	0	0
Proteobacteria	Gammaproteobacteria	Pseudomonadales	Pseudomonadaceae	Pseudomonas	Halopseudomonas_litoralis	0	0	0	0	0	0	0	0	0	30	99	0	287	44	15	53	155	37	0	0	0	0	0	0	0	82	0	0	0	0	0	0	0	0
Proteobacteria	Gammaproteobacteria	Pseudomonadales	Pseudomonadaceae	Pseudomonas	Pseudomonas_sp._108Z1	0	0	0	0	0	0	0	0	0	0	0	0	0	0	0	93	278	0	0	0	0	0	0	0	0	0	0	0	0	0	0	0	0	0
Proteobacteria	Gammaproteobacteria	Pseudomonadales	Pseudomonadaceae	Pseudomonas	Pseudomonas_sp._76_2010	0	0	0	0	0	0	0	0	0	0	0	0	0	0	0	0	143	0	0	0	0	0	0	0	0	0	0	0	0	0	0	0	0	0
Proteobacteria	Gammaproteobacteria	Pseudomonadales	Pseudomonadaceae	Pseudomonas	Pseudomonas_sp._MYb218	0	0	0	0	0	0	0	0	0	17	0	0	98	0	0	16	18	13	0	0	0	0	0	0	0	0	0	0	0	0	0	0	0	0
Proteobacteria	Gammaproteobacteria	Pseudomonadales	Pseudomonadaceae	Pseudomonas	unclassified_Pseudomonas	0	0	0	188	0	6	14	0	0	1092	2180	32	2282	211	251	4026	4720	1046	1	0	0	0	0	0	0	391	0	0	0	0	0	0	0	0
Proteobacteria	Gammaproteobacteria	Pseudomonadales	Saccharospirillaceae	Oceanobacter	unclassified_Oceanobacter	0	0	0	0	0	0	0	0	0	6	837	0	40	0	0	59	884	117	0	0	0	0	0	0	0	0	0	0	0	0	0	0	0	0
Proteobacteria	Gammaproteobacteria	Pseudomonadales	Spongiibacteraceae	BD1_7_clade	unclassified_BD1_7_clade	0	0	0	0	0	0	0	0	0	0	353	0	0	0	0	0	0	0	0	0	0	0	0	0	0	0	0	0	0	0	0	0	0	0
Proteobacteria	Gammaproteobacteria	Pseudomonadales	unclassified_Pseudomonadales	unclassified_Pseudomonadales	unclassified_Pseudomonadales	0	0	0	0	0	0	0	0	0	0	47	0	0	0	0	0	114	0	0	0	0	0	0	0	0	0	0	0	0	0	0	0	0	0
Proteobacteria	Gammaproteobacteria	Xanthomonadales	Xanthomonadaceae	Stenotrophomonas	unclassified_Stenotrophomonas	0	0	0	0	0	0	0	0	0	13	23	0	41	0	0	0	12	45	0	0	0	0	0	0	0	0	0	0	0	0	0	0	0	0
Spirochaetota	Spirochaetia	Spirochaetales	Spirochaetaceae	GWE2_31_10	unclassified_GWE2_31_10	0	0	0	0	0	71	0	34	101	175	182	21	23	30	170	252	146	32	61	387	75	0	0	0	0	0	0	0	0	0	0	0	0	0
Spirochaetota	Spirochaetia	Spirochaetales	Spirochaetaceae	Sphaerochaeta	unclassified_Sphaerochaeta	0	0	0	0	0	36	0	8	0	7	0	12	0	14	0	22	80	0	25	4	16	0	16	0	0	13	0	0	0	0	0	0	0	0
Spirochaetota	Spirochaetia	Spirochaetales	Spirochaetaceae	Treponema	Treponema_saccharophilum	20	0	0	0	0	0	0	0	0	0	0	0	0	0	0	0	0	5	1348	557	402	65	42	0	15	138	94	0	0	0	0	0	0	0
Spirochaetota	Spirochaetia	Spirochaetales	Spirochaetaceae	Treponema	unclassified_Treponema	1661	189	667	169	2640	1662	1965	514	335	751	164	177	129	244	258	1044	394	528	920	1414	290	3591	1164	231	744	2303	3096	220	213	470	152	366	816	143
Spirochaetota	Spirochaetia	Spirochaetales	Spirochaetaceae	Treponema	uncultured_rumen_bacterium	0	2411	0	0	287	907	0	0	0	0	0	0	0	0	0	0	0	0	2074	0	95	143	224	0	0	128	0	0	0	0	0	0	0	0
Verrucomicrobiota	Kiritimatiellae	WCHB1_41	unclassified_WCHB1_41	unclassified_WCHB1_41	unclassified_WCHB1_41	0	0	0	0	0	0	0	0	1	9	4	6	0	12	0	0	0	11	75	38	1	0	61	69	0	0	0	0	0	0	0	0	1	10
Verrucomicrobiota	Kiritimatiellae	WCHB1_41	uncultured_rumen_bacterium	uncultured_rumen_bacterium	uncultured_rumen_bacterium	10	0	0	2	0	0	0	0	0	128	219	88	88	297	281	170	143	284	116	108	102	5	32	85	35	5	0	140	68	89	62	71	81	69
Verrucomicrobiota	Lentisphaeria	Victivallales	Victivallaceae	Victivallis	unclassified_Victivallis	0	0	0	0	0	0	1	0	0	27	31	8	16	23	35	4	15	28	0	0	0	0	0	0	0	0	0	0	0	0	1	0	0	0
Verrucomicrobiota	Lentisphaeria	Victivallales	Victivallaceae	unclassified_Victivallaceae	unclassified_Victivallaceae	0	0	0	0	0	0	0	0	0	0	0	8	36	79	79	0	0	0	0	0	0	0	0	0	0	0	0	0	0	0	0	0	0	0
Verrucomicrobiota	Verrucomicrobiae	Verrucomicrobiales	Akkermansiaceae	Akkermansia	unclassified_Akkermansia	32	384	36	43	227	182	92	0	91	83	44	109	87	138	195	34	24	44	436	538	243	229	384	491	167	239	489	1717	2412	3952	1251	5015	431	1453
unclassified_Bacteria	unclassified_Bacteria	unclassified_Bacteria	unclassified_Bacteria	unclassified_Bacteria	unclassified_Bacteria	0	0	1	0	0	0	0	0	0	0	0	0	0	0	0	0	0	0	0	0	0	0	0	0	0	0	0	632	118	166	535	196	54	45
