# Supplementary material for: The Association between Gut Microbiome Diversity and Composition and Heat Tolerance in Cattle
Source: Microorganisms. 2022 Aug 19;10(8):1672. doi: 10.3390/microorganisms10081672 (PMC9414853; doi:10.3390/microorganisms10081672)
Supplement: Supplementary file 1 [file microorganisms-10-01672-s001.zip › Table S3 All reabundance of all samples.xls]

Phylum	Class	Order	Family	Genus	Species	HKA1	HKA2	HKA3	HKB1	HKB2	HKB3	HKC1	HKC2	HKC3	HLJA1	HLJA2	HLJA3	HLJB1	HLJB2	HLJB3	HLJC1	HLJC2	HLJC3	SDA1	SDA2	SDA3	SDB1	SDB2	SDB3	SDC1	SDC2	SDC3	SSA1	SSA2	SSA3	SSB1	SSC1	SSC2	SSC3
Actinobacteriota	Actinobacteria	Bifidobacteriales	Bifidobacteriaceae	Bifidobacterium	unclassified_Bifidobacterium	0	0	0	0	0	0	0	0	0	0	3.69E-05	0	0	0	0	0.000640504	0	0.001732249	0	0	1.93E-05	0	0.000188168	0	0	0	0	0	0	0	0	0	0	0
Actinobacteriota	Actinobacteria	Bifidobacteriales	Bifidobacteriaceae	unclassified_Bifidobacteriaceae	unclassified_Bifidobacteriaceae	0	0.001840888	0	0	0.000599952	0.000249933	0.00133163	0.000240176	0.000131133	0	0	0	0	0	0	0	0	0	0.000133012	0	0	0	0	0	0	0	0	0	0	0	0	0	0	0
Actinobacteriota	Actinobacteria	Corynebacteriales	Corynebacteriaceae	Corynebacterium	Corynebacterium_maris	0	4.98E-05	0	0.002399072	0	0.000178524	0.000233935	0	0	0	0	0	0	0	0	0	0	0	0	0	0	0	0	0	0	0	0	0	0	0	0	0	0	0
Actinobacteriota	Actinobacteria	Corynebacteriales	Corynebacteriaceae	Corynebacterium	unclassified_Corynebacterium	0	0	0	0.008672055	0	8.93E-05	0.000629825	0	0	0	0	0	0	0	0	0.000623193	0.000494663	0.000196847	0	0	0	0	0	0	0	0.001887386	0	0	0	0	0	0	0	0
Actinobacteriota	Actinobacteria	Micrococcales	Micrococcaceae	Arthrobacter	unclassified_Arthrobacter	0	0	0	0	0	0	0	0	0	0	0	0.000725523	0.001230992	0.000519111	0	0	0	0	0	0	0	0	0	0	0	0	0	0	0	0	0	0	0	0
Actinobacteriota	Actinobacteria	Micrococcales	Micrococcaceae	Glutamicibacter	unclassified_Glutamicibacter	0	0	0	0	0	0	0	0	0	0	0.001217106	0	0.002697321	0.000480658	0.001328778	0.001073277	0.000970301	0.000708647	0	0	0	0	0	0	0	0	0	0	0	0	0	0	0	0
Actinobacteriota	Actinobacteria	Micrococcales	Micrococcaceae	unclassified_Micrococcaceae	unclassified_Micrococcaceae	0	0	0	0	0	0	0	0	0	0	0	0.000782801	0.001104272	0.000461432	0	0	0	0	0	0	0	0	0	0	0	0	0	0	0	0	0	0	0	0
Actinobacteriota	Actinobacteria	Micrococcales	unclassified_Micrococcales	unclassified_Micrococcales	unclassified_Micrococcales	0	0	0	0	0	0	0	0	0	0	0	0	0	0	0	0	0	0	0	0	0	0	0	0	0	0.002090928	0	0	0	0	0	0	0	0
Actinobacteriota	Coriobacteriia	Coriobacteriales	Atopobiaceae	Atopobium	unclassified_Atopobium	0	0	0	0	0	0	0	0	0	0	0	0	0	0	0	0	0	0	0	0	0	0	0	0	0	0	0	0.000897204	0	0.000268718	0.000470762	0	0	0.00026255
Actinobacteriota	Coriobacteriia	Coriobacteriales	Atopobiaceae	Atopobium	uncultured_rumen_bacterium	0	0	0	0	0	0	0	0	0	0	0	0	7.24E-05	0	0	0	0	0	0	0	0	0	0	0	0	0	0	0.00211009	0.002708009	0.00058782	0.000823834	0.000314757	0.000476782	0.000612616
Actinobacteriota	Coriobacteriia	Coriobacteriales	Atopobiaceae	Olsenella	unclassified_Olsenella	0	0	0	0	0	0	0	0	0	0	0	0	0	0	0	0	0	0	0	0	0	0	0	0	0	0	0	0.028992972	0.015114075	0.012848074	0.025034467	0.013418594	0.006760093	0.006651264
Actinobacteriota	Coriobacteriia	Coriobacteriales	Atopobiaceae	unclassified_Atopobiaceae	unclassified_Atopobiaceae	0.000561298	0	0	0.000235974	0	0.000339195	0.000557845	0	0.000636931	0	0	0	0	0	0	0	0	0	0	0	0	0	0	0	0	0	0	0.000598136	0.00308036	0.000470256	0.000790208	0.001076801	0.001498459	8.75E-05
Actinobacteriota	Coriobacteriia	Coriobacteriales	Eggerthellaceae	DNF00809	unclassified_DNF00809	0	0	0	0	0	0	0	0	0	0	0	0	0	0	0	0	0	0	0	0	0	0	0	0	0	0	0	0.008290827	0.005686819	0.005827819	0.005111134	0.004655092	0.002179577	0.001767836
Actinobacteriota	Coriobacteriia	Coriobacteriales	Eggerthellaceae	Enterorhabdus	unclassified_Enterorhabdus	0	0	0	0	0	0	0	0	0	0	0	0	0	0	0	0	0	0	0	0	0	0	0	0	0	0	0	0.002525462	0.001624805	0.000537436	0.001076028	0.000844874	0.001260068	0.0005251
Actinobacteriota	Coriobacteriia	Coriobacteriales	Eggerthellaceae	Enterorhabdus	uncultured_rumen_bacterium	0	0	0	0	0	0	0	0	0	0	0	0	0	0	0	0	0	0	0	0	0	0	0	0	0	0	0	0.001246116	0.00147248	0.000151154	0.001126467	0.000298191	0.001004649	0
Actinobacteriota	Coriobacteriia	Coriobacteriales	Eggerthellaceae	Gordonibacter	unclassified_Gordonibacter	0	0	0	0.000884904	0	0	0	0	0	0	0	0	0	0	0	0	0	0	0	0	0	0	0	0.000268709	0	0	0	0	0.000372351	0	0	0	0	0.000665126
Actinobacteriota	Coriobacteriia	Coriobacteriales	Eggerthellaceae	Parvibacter	unclassified_Parvibacter	0	0	0	0	0	0	0	0	0.000524531	0	0	0	0	0.000173037	0	0	0	0	0	0	0	0	0	0	0	0	0	0.001977171	0.004315889	0.003745255	0.00342984	0.005599364	0.006589814	0.003220612
Actinobacteriota	Coriobacteriia	Coriobacteriales	Eggerthellaceae	Slackia	Slackia_heliotrinireducens	0	0	0	0	0	0	0	0	0	0	0	0	0	0	0	0	0	0	0	0	0	0	0	0	0	0	0	0.002691611	0.001861756	0.000251923	0.001092841	0.000231926	0.000613006	0.00031506
Actinobacteriota	Coriobacteriia	Coriobacteriales	Eggerthellaceae	unclassified_Eggerthellaceae	unclassified_Eggerthellaceae	0.000290326	6.63E-05	0.000139938	0	0	0.000196376	0	0	0.000149866	0	0	0	9.05E-05	0	0	0	9.51E-05	0	0	0	0	0	0	0.000326289	0	0	0	0.004103876	0.00294496	0.000738974	0.00200074	0.000844874	0.002179577	0.000700133
Bacteroidota	Bacteroidia	Bacteroidales	Bacteroidaceae	Bacteroides	unclassified_Bacteroides	0.001412921	0	0	0.000412955	0.001251328	0	0.00039589	0.000609677	0.001292595	0.001272588	0.001069578	0.001374675	0.000380159	0.001249712	0.00149962	0.00112521	0.000989327	0.011200567	0.004161362	0.006814037	0.001526836	0.00207076	0.004045612	0.002149671	0.001703262	0.00259053	0.001098819	0	0	0	0	0	0	0
Bacteroidota	Bacteroidia	Bacteroidales	Bacteroidaceae	Bacteroides	uncultured_Bacteroides_sp.	0.016993768	0.021692622	0.022617548	0.010048571	0.018221399	0.023100955	0.014719908	0.014355128	0.009216763	0.017161764	0.01976875	0.030720177	0.014554671	0.021168192	0.020520121	0.013415964	0.016989783	0.028660853	0.026811333	0.032246428	0.034382791	0.030229553	0.032063827	0.042072129	0.0307698	0.025350184	0.029481879	0.003123598	0.009951933	0.006516409	0.006456169	0.00462196	0.004835936	0.008611636
Bacteroidota	Bacteroidia	Bacteroidales	Bacteroidales_RF16_group	unclassified_Bacteroidales_RF16_group	unclassified_Bacteroidales_RF16_group	0.00658073	0	0.004950322	0.007472519	0.002108403	0.004605909	0.005398499	0.004526392	0.009123096	0.009326255	0.006269939	0.00492592	0.004670529	0.005171883	0.007327259	0.008793948	0.00500371	0.001968465	0.004636403	0.008176844	0.004870412	0.004265411	0.004873551	9.60E-05	0.004054504	0.001554318	0.001620293	0	0	6.72E-05	0	0	1.70E-05	0.000542603
Bacteroidota	Bacteroidia	Bacteroidales	Bacteroidales_RF16_group	uncultured_Paludibacter_sp.	uncultured_Paludibacter_sp.	0	0	0	0	0	0	0	0.000369501	0.001217662	0.001654365	0.000958932	0.00091645	0.000905141	1.92E-05	0.000987092	0	0	0	0.00011401	0	0.002048665	0	0.00099729	0.000403063	0	0.002127935	0.001303684	0	0	0	0	0	0	0
Bacteroidota	Bacteroidia	Bacteroidales	Bacteroidales_RF16_group	uncultured_Parabacteroides_sp.	uncultured_Parabacteroides_sp.	0.001354856	0	0	0.00104222	0	0	0	0.001607331	0.000299732	0.001472567	0.003927933	0.003016649	0.001068067	0.002614781	0.002505695	0.00375647	0.003995358	0.004586524	0.001292112	0.003787803	0.004155312	0	0.000508054	0.000403063	0.003869367	0	0.000800834	0	0	0	0	0	0	0
Bacteroidota	Bacteroidia	Bacteroidales	Bacteroidales_RF16_group	uncultured_Porphyromonadaceae_bacterium	uncultured_Porphyromonadaceae_bacterium	0.020148647	0.007562565	0.030296669	0	0.003171175	0.020012497	0.006514189	0.003417888	0.005338978	0.0131622	0.012964022	0.007560715	0.006679942	0.012612474	0.011731207	0.014177645	0.008085843	0.010078542	0.008322724	0.005290899	0.007962737	0.017557211	0.010123438	0.001017255	0.010367682	0.005514128	0.007077141	0.00207686	0.000609302	0.000873333	0.000790208	0.000347889	0.001055732	0.001452776
Bacteroidota	Bacteroidia	Bacteroidales	Bacteroidales_UCG_001	unclassified_Bacteroidales_UCG_001	unclassified_Bacteroidales_UCG_001	0	0	0	0	0	0	0	0	0	0.001018071	0	0.000534596	0.000742216	0.000903638	0.000531511	0	0.000228306	0	0.001824159	0.002044211	0.000154616	0	0	0.001381931	0	0	0	0	0	0	0	0	0	0
Bacteroidota	Bacteroidia	Bacteroidales	Bacteroidales_UCG_001	uncultured_rumen_bacterium	uncultured_rumen_bacterium	0	0	0	0.000314632	0	0	0	0	0.001704726	0	0	0	0	0	0	0	0	0	0	0	0	0	0	0	0	0	0	0	0	0	0	0	0	0
Bacteroidota	Bacteroidia	Bacteroidales	Barnesiellaceae	unclassified_Barnesiellaceae	uncultured_Bacteroidales_bacterium	0	0.00079606	0.001906661	0	0	0.000285638	0	0	0	0	5.53E-05	5.73E-05	0	0	0	0	0.000570765	0	0	0	0.000135289	0	0.00047042	0	0.001499611	0.000333068	0.001601669	0.000531676	0.000169251	0	0	0	0.000119196	5.25E-05
Bacteroidota	Bacteroidia	Bacteroidales	Barnesiellaceae	unclassified_Barnesiellaceae	uncultured_Porphyromonadaceae_bacterium	0	0	0	0	0	0	0	0	0	0	0	0.000840079	0.000524982	0	0	0	0	0	0.000798069	0.001122312	0.001024333	0.000265482	0	0	0	0	0	0	0	0	0	0	0	0
Bacteroidota	Bacteroidia	Bacteroidales	Dysgonomonadaceae	Fermentimonas	unclassified_Fermentimonas	0	0	0	0.000570271	0	5.36E-05	0.00017995	0	0	0	0	0	0	0	0	0	0	0	0	0	0	0	0	0	0	0.007142461	0	0	0	0	0	0	0	0
Bacteroidota	Bacteroidia	Bacteroidales	Dysgonomonadaceae	Fermentimonas	uncultured_prokaryote	0	0	0	0	0	0	0	0	0	0	0.000995814	0	0	0	0	0.001454117	0.007134567	0	0	0	0	0	0	0	0	0.008382214	0	0	0	0	0	0	0	0
Bacteroidota	Bacteroidia	Bacteroidales	Dysgonomonadaceae	Proteiniphilum	uncultured_prokaryote	0	0	0	0	0	0	0	0	0	0	0.007284194	0	0	0	0	0.009192099	0.033142444	0.001200764	0	0	0	0	0	0	0.000203651	0.012082971	0	0	0	0	0	0	0	0
Bacteroidota	Bacteroidia	Bacteroidales	Dysgonomonadaceae	unclassified_Dysgonomonadaceae	unclassified_Dysgonomonadaceae	0	0	0	0.000373626	0	0	0	0.000166276	0	0.000272698	0.00018441	0	0.000362056	0.000749827	0.000607441	0	0	0	0	0	0.000908371	0	0	0	0	0.000647632	0	0.000415372	0	0.000503846	0	0	0.000374615	0.001785339
Bacteroidota	Bacteroidia	Bacteroidales	Dysgonomonadaceae	unclassified_Dysgonomonadaceae	uncultured_soil_bacterium	0	0	0	0	0	0	0	0	0	0	0.000958932	0	0	0	0	0.00131563	0.001731322	0.000236216	0	0	0	0	0	0	0	0.001554318	0	0	0	0	0	0	0	0
Bacteroidota	Bacteroidia	Bacteroidales	F082	unclassified_F082	unclassified_F082	0.006735571	0.001492612	0	0.00804279	0.011759059	0.007158797	0.013226323	0.010715539	0.002959855	0.006708359	0.002839914	0.002997556	0.005666184	0.007921249	0.008333333	0.005539495	0.003367516	0.010472235	0.009443822	0.011082831	0.01126766	0.003911435	0.004403131	0.006314658	0.008886585	0.0034232	0.004209036	0.00289099	0.003097285	0.005156024	0.002135243	0.002650586	0.009092921	0.00673878
Bacteroidota	Bacteroidia	Bacteroidales	M2PB4_65_termite_group	unclassified_M2PB4_65_termite_group	unclassified_M2PB4_65_termite_group	0	0	0	0	0	0	0	0	0	0	1.84E-05	0	0	0.006113974	0.000208808	0	0	0	0.01666445	0.023107602	0	0	0.000357519	0.025834437	0	0	0	0	0	0	0	0	0	0
Bacteroidota	Bacteroidia	Bacteroidales	Marinifilaceae	Odoribacter	uncultured_Bacteroidales_bacterium	0	0	0	0	0	0	0	0	0	0	0	0	0	0	0	0	0	0	0.000399035	0	0.001294911	0	0.000715038	0.000345483	0	0	0	0.000265838	0.000930878	0.000335897	0.000739769	0.000331323	1.70E-05	0.000437583
Bacteroidota	Bacteroidia	Bacteroidales	Muribaculaceae	unclassified_Muribaculaceae	unclassified_Muribaculaceae	0.02411644	0.032688193	0.047281696	0.029339469	0.079090816	0.026867803	0.017401162	0.034419051	0.03042281	0.007181035	0.005974883	0.010863754	0.005992035	0.004114435	0.008580106	0.004518151	0.004356843	0.033483593	0.008246717	0.00593222	0.009605535	0.007398099	0.011327713	0.005738853	0.023345799	0.009418426	0.018866168	0.006679183	0.003486562	0.004584999	0.006557046	0.002534623	0	0.006301197
Bacteroidota	Bacteroidia	Bacteroidales	Muribaculaceae	uncultured_Porphyromonadaceae_bacterium	uncultured_Porphyromonadaceae_bacterium	0	0	0	0	0	0	0	0	0	0	0	0.000897358	0	0	0	0	0	0	0	0	0	0.000654856	0	0	0	0	0.00119194	0	0	0	0	0	0	0
Bacteroidota	Bacteroidia	Bacteroidales	Paludibacteraceae	unclassified_Paludibacteraceae	unclassified_Paludibacteraceae	0	0	0	0	0	0	0	0	0.000131133	0	0.000848286	0.000477318	0	0	0	0	0.000780046	0	0.00011401	0.000701445	0.000463849	0	0	0.000403063	0	0.000573617	0	0	0	0	0	0	0	0
Bacteroidota	Bacteroidia	Bacteroidales	Paludibacteraceae	unclassified_Paludibacteraceae	uncultured_Paludibacter_sp.	0	0.000563875	0	0.003932905	0.000325688	0	0.002357345	0	0	0.004181362	0.004776218	0.003761265	0.003548154	0.004422056	0.005580866	0.002544705	0	0	0.00275524	0.003226647	0.002879728	0.002194651	0.003443474	0.005259016	0.009219832	0.002627537	0.006443923	0.00350574	0.001015503	0.001326795	0.000924712	0	0	0
Bacteroidota	Bacteroidia	Bacteroidales	Prevotellaceae	Alloprevotella	uncultured_Bacteroidales_bacterium	0.002012929	0	0.004443045	0.003362633	0.013781755	0.000696242	0.001889475	0.000387976	0	0.006926517	0.013240637	0.008992668	0.003530051	0.002980082	0.004460896	0.00038084	0.003462643	0.001850357	0.012598096	0.004910115	0.010881119	0.006902533	0.020999548	0.03767682	0.016514237	0.006235775	0.013260327	0.000132919	0.001709431	0.001427564	0.001378661	0.000314757	0.002554191	0.003605685
Bacteroidota	Bacteroidia	Bacteroidales	Prevotellaceae	Prevotella	Prevotella_sp._BP1_145	0	0.000530706	0.006961937	0	0.00011999	0	0	0	0	0	0	0	0	0	0	0	0	0	0	0	0	0	0	0	0	0	0	0	0	1.68E-05	0	0	0	0
Bacteroidota	Bacteroidia	Bacteroidales	Prevotellaceae	Prevotella	unclassified_Prevotella	0.005806527	0	0	0.001061884	0	0	0	0.004711142	0.002041925	0.000545395	0.00129087	0.000992821	0	0	0.00111997	0.004275798	0.000665893	0	0.001045091	0.000360743	0.002241936	0.000619458	0.003274123	0.00044145	0	0.001868882	0.004078668	0.000863974	0.00441744	0.007087434	0.000891086	0.004704791	0.003184225	0.003920745
Bacteroidota	Bacteroidia	Bacteroidales	Prevotellaceae	Prevotellaceae_Ga6A1_group	unclassified_Prevotellaceae_Ga6A1_group	0	0	0	0	0	0	0	0	0	0	0	0	0	0	0	0.001592605	0.00131276	0.004862109	0	0	0	0	0	0	0	0	0	0	0	0	0	0	0	0
Bacteroidota	Bacteroidia	Bacteroidales	Prevotellaceae	Prevotellaceae_UCG_001	unclassified_Prevotellaceae_UCG_001	0	0	0	0.001809136	0.002468374	0.002177988	0	0.001681231	0.001648527	0.000563575	0.002102274	0.00246296	0.001013758	0.002326386	0.002581625	0.002215798	0.000418561	0	0.001121098	0.003607431	0	0.003734447	0.002483818	0.002552734	0.001647721	0.000814166	0.003855179	0	0	0	0	0	0	0
Bacteroidota	Bacteroidia	Bacteroidales	Prevotellaceae	Prevotellaceae_UCG_001	uncultured_Bacteroidales_bacterium	0.002109705	0.007910841	0.003778338	0	0.003822551	0	0.00172752	0.000240176	0	0.001527106	0	0.001603788	0	0.001057448	0	0.001419496	0	0	0	0	0	0	0	0	0	0	0	0.019206805	0.008360978	0.031893453	0.008456908	0.029570605	0.017981508	0.012812434
Bacteroidota	Bacteroidia	Bacteroidales	Prevotellaceae	Prevotellaceae_UCG_003	unclassified_Prevotellaceae_UCG_003	0.012677583	0.000348276	0.005107753	0.023813738	0.005965237	0.00348121	0.002033435	0.011583868	0.006425507	0.005053994	0.005089715	0.003818543	0.001828385	0.004787357	0.003321944	0.004847058	0.001788398	0.001181079	0.009386817	0.005872097	0.006474556	0.009044088	0.011534698	0.010249323	0.012182027	0.008437726	0.005475472	0.000398757	0.000287726	0	0.000302633	0.000331323	0.001566571	0.000717636
Bacteroidota	Bacteroidia	Bacteroidales	Prevotellaceae	Prevotellaceae_UCG_003	uncultured_Bacteroidales_bacterium	0.006600085	0.0029023	0.00752169	0.012486972	0.005468134	0.011818263	0	0.011824043	0.005526311	0.010907901	0.011378096	0.021612952	0.004797248	0.007190648	0.011788155	0.007339831	0.00759118	0.01100372	0.025234195	0.024851193	0.040973309	0.013221005	0.017142104	0.017274141	0.03380605	0.023536813	0.014843372	0.000382142	0.000304651	0	0.000773395	0.000596382	0.000306503	0.001592803
Bacteroidota	Bacteroidia	Bacteroidales	Prevotellaceae	Prevotellaceae_UCG_004	unclassified_Prevotellaceae_UCG_004	0.006135563	0.004494419	0.001137	0.022712524	0.004182523	0.018727127	0.011534793	0.015482107	0.013375546	0.010671563	0.012355469	0.012563006	0.010499638	0.013862186	0.011237661	0.008932435	0.006050113	0.013050924	0.013548179	0.011664028	0.011924779	0.008990991	0.01228737	0.015930596	0.01458881	0.020354162	0.010466719	0.009470484	0.015604901	0.009102818	0.015064394	0.00725598	0.002724471	0.024032066
Bacteroidota	Bacteroidia	Bacteroidales	Prevotellaceae	Prevotellaceae_UCG_004	uncultured_Bacteroidales_bacterium	0.000658073	0.000812644	0.000962077	0.002753033	0.002759779	0.000589128	0.00305915	0.002050733	0.000468331	0.000454496	0.000977373	0.001221934	0.000416365	0.001499654	0.00157555	0.000103866	0.000703944	0.001200764	0.000931081	0.002324789	0.003343577	0.003893736	0.004271414	0.001573866	0.00368423	0.003682253	0.003296458	0.002724841	0.007260849	0.005777434	0.002101617	0.004505997	0.008871558	0.007438913
Bacteroidota	Bacteroidia	Bacteroidales	Prevotellaceae	unclassified_Prevotellaceae	unclassified_Prevotellaceae	0.00114195	0	0.002483907	0.000176981	0	0.00385611	0.000737795	0.001108504	0.001067796	0	0.000719199	0.001107377	0.000398262	0.000769053	0	0.000259664	0	0.001948781	0.001273111	0.005050404	0.003730117	0.00265482	0.001166642	0.003205313	0	0.002164943	0.003687563	0	0	0	0	0	0	0
Bacteroidota	Bacteroidia	Bacteroidales	Rikenellaceae	Alistipes	unclassified_Alistipes	0.052026478	0.026900177	0.022302687	0.053723477	0.028317735	0.032330626	0.049756168	0.036488259	0.041419232	0.035123441	0.033599498	0.033603177	0.030467053	0.035337999	0.043507973	0.027818651	0.033275623	0.043483396	0.029680582	0.044932561	0.044722754	0.035025929	0.047794671	0.034030057	0.043266561	0.043872472	0.058684397	0.009104956	0.003554262	0.009270767	0.004455429	0.004903585	0.015682735	0.013897641
Bacteroidota	Bacteroidia	Bacteroidales	Rikenellaceae	Anaerocella	uncultured_Bacteroidetes_bacterium	0	0	0	0	0	0	0	0	0	0	0.002637063	0	0	0	0	0.000121176	0.002644546	0	0	0	0	0	0	0	0	0.001295265	0	0	0	0	0	0	0	0
Bacteroidota	Bacteroidia	Bacteroidales	Rikenellaceae	Rikenellaceae_RC9_gut_group	unclassified_Rikenellaceae_RC9_gut_group	0.012774358	0.027994759	0.004215645	0.027943288	0.042750866	0.034990628	0.060823091	0.036026382	0.031640471	0.005253972	0.003005883	0.008649	0.004145547	0.004325925	0.007289294	0.004310419	0.001464965	0.012480069	0.016303418	0.018918973	0.012137377	0.021769526	0.025383863	0.010921096	0.028566668	0.00958496	0.010969568	0.030156014	0.014995599	0.022572302	0.01395474	0.015472798	0.023685869	0.028180354
Bacteroidota	Bacteroidia	Bacteroidales	Rikenellaceae	Rikenellaceae_RC9_gut_group	uncultured_Bacteroidales_bacterium	0.044071536	0.038459625	0.058581724	0.051442393	0.084370393	0.074979916	0.079735833	0.058270364	0.038065979	0.02314293	0.021686614	0.034901482	0.019261405	0.023475352	0.025702354	0.014610418	0.027853351	0.030983642	0.032264807	0.01980079	0.046249589	0.051538911	0.048886045	0.039020364	0.061113785	0.042133116	0.06710247	0.007742536	0.003537337	0.002703974	0.00326171	0.002368962	0.001873074	0.003203109
Bacteroidota	Bacteroidia	Bacteroidales	Rikenellaceae	dgA_11_gut_group	unclassified_dgA_11_gut_group	0.011419502	0.00253744	0.005282676	0.010933475	0.004319654	0.017495314	0.020370337	0.007814954	0.009329162	0.002981493	0.006362144	0.005403238	0.006698045	0.006844574	0.003208049	0.002769747	0.002473317	0.004251885	0.017139491	0.009018578	0.012755842	0.010283004	0.018741532	0.010518032	0.014459214	0.006143256	0.002625992	0.014853706	0.017415882	0.012058715	0.007818017	0.008647538	0.004835936	0.013285024
Bacteroidota	Bacteroidia	Bacteroidales	Rikenellaceae	unclassified_Rikenellaceae	unclassified_Rikenellaceae	0.000948399	0.000497537	0.000332354	0.001750143	0.000325688	0	0.00176351	0	0.001330061	0.000199978	0.000350379	0	0.000380159	0	0.000417616	0	0	0	0.000513045	0.000300619	0	0	0	0	0	0	0	0	0	0	0	0	0	0
Bacteroidota	Bacteroidia	Bacteroidales	Tannerellaceae	Parabacteroides	unclassified_Parabacteroides	0.00114195	0.003200823	0.000962077	0.000707923	0.001782715	0.000731947	0.003005165	0.002290908	0	0.000436316	0.000424143	0.00063006	0	0.000230716	0	0.00038084	0.000703944	0.00029527	0.001026089	0.000501032	0.000347887	0.001097326	0.002540268	0.001535479	0.001425556	0.002461003	0.002774984	0	0	0.000151154	0.000100878	0	0	0
Bacteroidota	Bacteroidia	Bacteroidales	gir_aah93h0	unclassified_gir_aah93h0	unclassified_gir_aah93h0	0	0	0	0	0	0	0	0	0	0	0.000313497	0.000477318	0.000199131	0	0.000284738	0	0	0	0.001026089	0.000601239	0	0.000566362	0.000715038	0.000479837	0.001129337	0	0	0	0	0	0	0	0	0
Bacteroidota	Bacteroidia	Bacteroidales	p_251_o5	unclassified_p_251_o5	unclassified_p_251_o5	0	0	0	0	0	0	0	0	0	0.005017634	0.001143342	0	0.00095945	0.000538337	0.000930144	0.005297142	0.000627842	0.000964548	0.003040265	0.00296611	0.00156549	0	0	0.001554673	0	0	0	0.000415372	0.001100129	0	0.000420323	0.00056325	0.00430807	0.0005251
Bacteroidota	Bacteroidia	Bacteroidales	p_251_o5	uncultured_Bacteroidales_bacterium	uncultured_Bacteroidales_bacterium	0	0	0	0.003048001	0	0.000160671	0.00233935	0	0.001367528	0.000363597	0.002010069	0	0	0.002191802	7.59E-05	0.001263697	0	0.000492116	0.000304026	0.005471271	0	0	0.000545687	0	0	0	0.005028495	0	0	0	0	0	0	0
Bacteroidota	Bacteroidia	Bacteroidales	p_2534_18B5_gut_group	unclassified_p_2534_18B5_gut_group	unclassified_p_2534_18B5_gut_group	0.012619518	0.006700168	3.50E-05	0.01382416	0	0.025493171	0	0.010346038	0.00666904	0.002436098	0.005274125	0.005078662	0.002896452	0.005402599	0.004992407	0.005158655	0.000532714	0	0.00874076	0.002304748	0.025801589	0.01964567	0.015843745	0.012283833	0.022475654	0.008104657	0.008716058	0	0	0	0	0	0	0
Bacteroidota	Bacteroidia	Bacteroidales	unclassified_Bacteroidales	unclassified_Bacteroidales	unclassified_Bacteroidales	0.007200093	0	0.000787154	0.002163098	0.001782715	0.00067839	0.002501305	0.006189148	0.003784118	0.01101698	0.006177734	0.006797006	0.007404055	0.00519111	0.010990888	0.004448907	0.0083522	0.009566741	0.007144622	0.003687596	0.00332425	0.006548557	0.007357369	0.006237884	0.003591661	0.00479248	0.00601557	0.000215993	0	0.002015384	0	0.003545159	0.001447375	0.002065392
Bacteroidota	Bacteroidia	Bacteroidales	unclassified_Bacteroidales	uncultured_Bacteroidales_bacterium	unclassified_Bacteroidales	0.003406496	0.001293597	0.000717184	0.005486402	0.001542734	0.003284834	0.00100772	0.007482402	0.002266724	0.007471912	0.006712523	0.007770735	0.006535119	0.008940245	0.014996203	0.004743192	0.004794429	0.00765733	0.007182625	0.007415275	0.005295607	0.00812375	0.007338552	0.004548857	0.016940053	0.004662954	0.007263381	0	0	0.000184744	0.000924712	0	0.000408671	0.002853042
Bacteroidota	Bacteroidia	Flavobacteriales	Crocinitomicaceae	Brumimicrobium	unclassified_Brumimicrobium	0	0	0	0	0	0	0	0	0	0	0	0	0	0	0	0	0.001883526	0	0	0	0	0	0	0	0	0.000333068	0	0	0	0	0	0	0	0
Bacteroidota	Bacteroidia	Flavobacteriales	Crocinitomicaceae	Fluviicola	unclassified_Fluviicola	0	0	0	0	0	0	0	0	0	0.003090572	0.004149225	0	0.002480087	0	0	0.00057126	0	0.001791303	0	0	0	0	0	0	0	0	0	0	0	0	0	0	0	0
Bacteroidota	Bacteroidia	Flavobacteriales	Flavobacteriaceae	Aequorivita	unclassified_Aequorivita	0	0	0	0	0	0	0	0	0	0	7.38E-05	0	0	0	0	6.92E-05	0.000323434	0	0	0	0	0	0	0	0	0.001813371	0	0	0	0	0	0	0	0
Bacteroidota	Bacteroidia	Flavobacteriales	Flavobacteriaceae	Aequorivita	uncultured_Aequorivita_sp.	0	0	0	0	0	0	0	0	0	0	0	0	0	0	0	0.000155798	0.001293735	0	0	0	0	0	0	0	0	0.002479507	0	0	0	0	0	0	0	0
Bacteroidota	Bacteroidia	Flavobacteriales	Flavobacteriaceae	Flavobacterium	unclassified_Flavobacterium	0	0	0	0.000766916	0	0	0.00010797	0	0	0.004944915	0.007800542	0.012715748	0.044623461	0.006037068	0.007744875	0.005591428	0.007515078	0.020235822	0	0	0	0	0	0	0	0.002701552	0	0	0	0	0	0	0	0
Bacteroidota	Bacteroidia	Flavobacteriales	Flavobacteriaceae	Myroides	Myroides_bacterium_SM9_19	0	0	0	0	0	0	0	0	0	0.001181689	0.003651318	0.001718344	0.006643736	0.000269169	0.003568717	0.004171932	0.003652899	0.001476349	0	0	0	0	0	0	0	0	0	0	0	0	0	0	0	0
Bacteroidota	Bacteroidia	Flavobacteriales	Flavobacteriaceae	unclassified_Flavobacteriaceae	unclassified_Flavobacteriaceae	0	0	0	0.001632155	0	0	0.00046787	0	0	0	0.001733454	0	0	0	0	0	0.002910904	0.000196847	0	0	0	0	0	0	0	0	0	0	0	0	0	0	0	0
Bacteroidota	Bacteroidia	Flavobacteriales	Weeksellaceae	Chryseobacterium	Chryseobacterium_sp._LW_NC3	0	0	0	0	0	0	0	0	0	0.001418027	0.003393144	0.00091645	0	0	0	8.66E-05	0	0.000452747	0	0	0	0	0	0	0	0	0	0	0	0	0	0	0	0
Bacteroidota	Bacteroidia	Flavobacteriales	Weeksellaceae	Ornithobacterium	unclassified_Ornithobacterium	0	0	0	0	0	0	0	0	0	0	0	0	0	0	0	0	0.000190255	9.84E-05	0	0	0	0	0	0	0	0.002257462	0	0	0	0	0	0	0	0
Bacteroidota	Bacteroidia	Sphingobacteriales	Sphingobacteriaceae	Sphingobacterium	Sphingobacterium_alimentarium	0	0	0	0	0	0	0	0	0	0.00109079	0.0018441	0.002081106	0.006752353	0.005133431	0.005334093	0.000553949	0	0.001810988	0	0	0	0	0	0	0	0	0	0	0	0	0	0	0	0
Bacteroidota	Bacteroidia	Sphingobacteriales	Sphingobacteriaceae	Sphingobacterium	Sphingobacterium_sp._ML3W	0	0	0	0	0	0	0	0	0	0.000345417	0.000516348	0.00091645	0.002009413	0	0	0.00074437	0	0.001043287	0	0	0	0	0	0	0	0	0	0	0	0	0	0	0	0
Bacteroidota	Bacteroidia	unclassified_Bacteroidia	unclassified_Bacteroidia	unclassified_Bacteroidia	unclassified_Bacteroidia	0	0	0	0.000786581	0	0	0	0.001016129	0.000636931	0	0	0.000496411	0	0.00021149	0.000322703	0	0	0	0.000988086	0.000280578	0	0.000796446	0.000169351	0.000594998	0	0	0	0.000863974	0.001286304	0.00068859	0.001361848	0.00056325	0	0.000910173
Campylobacterota	Campylobacteria	Campylobacterales	Arcobacteraceae	Arcobacter	Aliarcobacter_skirrowii	0	0	0	0	0	0	0	0	0	0	0	0	0	0	0	0.000848235	0.006031088	0	0	0	0	0	0	0	0	0.00053661	0	0	0	0	0	0	0	0
Campylobacterota	Campylobacteria	Campylobacterales	Arcobacteraceae	Arcobacter	unclassified_Arcobacter	0	0	0	0	0	0	0	0	0	0.120877722	0.17164881	0	0.019188993	0	0	0.010473107	0.164152128	0.024782977	0	0	0	0	0	0	0	0	0	0	0	0	0	0	0	0
Campylobacterota	Campylobacteria	Campylobacterales	Arcobacteraceae	Pseudarcobacter	unclassified_Pseudarcobacter	0	0	0	0	0	0	0	0	0	0.002781515	0	0	0	0	0	0	0	0	0	0	0	0	0	0	0	0	0	0	0	0	0	0	0	0
Campylobacterota	Campylobacteria	Campylobacterales	Campylobacteraceae	Campylobacter	unclassified_Campylobacter	0	0	0	0	0	0	0	0	0	0	0	0	0	0	0.000284738	0.00038084	0.000456612	0.001555087	0	0	0.002222609	0.000159289	0	0	0	0	0	0	0	0	0	0	0	0
Chloroflexi	Anaerolineae	Anaerolineales	Anaerolineaceae	Flexilinea	uncultured_rumen_bacterium	0	0	0	0	0	0	0	0	0	0	0	0	0	0	0	0	0	0	0	0	0	0	0	0	0	0	0	0.001711333	0.003232686	0	0.000807021	0	0	0.002397956
Cyanobacteria	Cyanobacteriia	Cyanobacteriales	unclassified_Cyanobacteriales	unclassified_Cyanobacteriales	unclassified_Cyanobacteriales	0	0	0	0	0	0	0	0	0	0	0	0	0	0	0	0	0	0	0	0	0	0	0	0	0	0	0	0.003655274	0	0	0	0	0	0
Cyanobacteria	Cyanobacteriia	Synechococcales	Cyanobiaceae	Cyanobium_PCC_6307	unclassified_Cyanobium_PCC_6307	0	0	0	0	0	0	0	0	0	0	0	0	0	0	0	0	0	0	0	0	0	0	0	0	0	0	0	0.000614751	0.011559813	0.001830641	0.00469081	0.001888543	0.010523269	0.002205419
Cyanobacteria	Cyanobacteriia	Synechococcales	Cyanobiaceae	unclassified_Cyanobiaceae	unclassified_Cyanobiaceae	0	0	0	0	0	0	0	0	0	0	0	0	0	0	0	0	0	0	0	0	0	0	0	0	0	0	0	0.002575307	0	0.000319102	0	0.000231926	0.000238391	0.002607996
Cyanobacteria	Vampirivibrionia	Gastranaerophilales	unclassified_Gastranaerophilales	unclassified_Gastranaerophilales	unclassified_Gastranaerophilales	0	0	0	0	0	0.000892618	0.000773785	0.001441055	0.00247279	0.002363379	0.003005883	0.000439132	0.001267198	0.004133661	0.004650721	0.000536639	0.000475638	0	0.003496304	0.003507225	0.003904061	0.002053061	0.002314466	0.001880962	0.001370015	0.003478711	0.000912579	0	0	0.000218333	0	0	0	0.000192537
Cyanobacteria	Vampirivibrionia	Gastranaerophilales	uncultured_rumen_bacterium	uncultured_rumen_bacterium	uncultured_rumen_bacterium	0	0	0	0	0	0	0	0.000794428	0	0.001218049	0.000461025	0	0.00025344	0.00094209	0.00149962	0.000173109	0	0	0.003819332	0.001823757	0.003053671	0	0	0.002207251	0	0.001387784	0	0.000847359	0.000710852	0.000268718	0.00085746	0.00021536	0	0.001190226
Desulfobacterota	Desulfovibrionia	Desulfovibrionales	Desulfomicrobiaceae	Desulfomicrobium	unclassified_Desulfomicrobium	0	0	0	0	0	0	0	0	0	0	0	0	0	0	0	0	0	0	0	0	0	0	0	0	0	0.003645245	0	0	0	0	0	0	0	0
Desulfobacterota	Desulfovibrionia	Desulfovibrionales	Desulfovibrionaceae	Mailhella	unclassified_Mailhella	0	6.63E-05	5.25E-05	0	0	0	0	0	0	0.003108752	0.003725082	0.004314953	0.004290369	0.006767669	0.008295368	0.002700504	0.003253363	0.005393595	0.00976685	0.007695853	0.010881119	0.001380507	0.000639771	0.010441258	0.003591661	0.002183447	0.001098819	0	0.000270801	0	0	0	0	0.000227543
Desulfobacterota	Desulfuromonadia	Bradymonadales	uncultured_rumen_bacterium	uncultured_rumen_bacterium	uncultured_rumen_bacterium	0	0	0	0	0	0	0	0	0	0.000345417	0	0	0	0.005056525	0.000588459	0	0	0.001200764	0.002451213	0.008958454	0.001488182	0	0.000545687	0.000633385	0	0	0	0	0	0	0	0	0	0
Elusimicrobiota	Elusimicrobia	Elusimicrobiales	Elusimicrobiaceae	Elusimicrobium	unclassified_Elusimicrobium	0.000561298	0	0	0.000176981	0	0	0	0.000314076	0	0.000290877	0	0	0	0.000499885	0	0.000121176	0	0	0.001463127	0.000741528	0.003401558	0.000778747	0	0.000844514	0.000388788	0.000518106	0	0	0.000490827	0	0	0	0	0.000595113
Fibrobacterota	Fibrobacteria	Fibrobacterales	Fibrobacteraceae	Fibrobacter	unclassified_Fibrobacter	0	0	0	0	0	0	0	0	0	0	0.001641249	0.000935543	0.000923244	0.004152888	0.001480638	0	0	0	0.008037699	0.006012386	0.000831062	0	0.00276607	0.004664018	0	0.004459412	0	0	0	0	0	0	0	0
Firmicutes	Bacilli	Acholeplasmatales	Acholeplasmataceae	Acholeplasma	Acholeplasma_laidlawii	0	0	0	0	0	0	0	0	0	0.000327237	0.002692386	0	0.000597393	0	0	0.005383697	0.004699302	0.00055117	0	0	0	0	0	0	0	0.000296061	0	0	0	0	0	0	0	0
Firmicutes	Bacilli	Acholeplasmatales	Acholeplasmataceae	Acholeplasma	Paracholeplasma_brassicae	0	0	0	0	0	0	0	0	0	0	0.001364634	0	0	0	0	0.001021344	0.001008352	0	0	0	0	0	0	0	0	0	0	0	0	0	0	0	0	0
Firmicutes	Bacilli	Acholeplasmatales	Acholeplasmataceae	Acholeplasma	unclassified_Acholeplasma	0	0	0	0	0	0	0	0	0	0	0.001493721	0	0.000289645	0	0	0.00356605	0.021004167	0	0	0	0	0	0	0	0	0	0	0	0	0	0	0	0	0
Firmicutes	Bacilli	Acholeplasmatales	Acholeplasmataceae	Anaeroplasma	unclassified_Anaeroplasma	0	0	0	0	0	0	0	0	0	0	0	0	0	0	0	0	0	0	0	0	0	0	0	0	0	0	0	0.002159935	0	0.000117564	0.006002219	0	0	0
Firmicutes	Bacilli	Acholeplasmatales	Acholeplasmataceae	Anaeroplasma	uncultured_Anaeroplasma_sp.	0.000116131	0	0	0	0	0	0	0	0	0	0.000313497	0.001031007	0.000199131	0.000249942	0	0	0	0	0	0	0	0.000212386	0	0	0	0	0	0	0	0	0	0	0	0
Firmicutes	Bacilli	Acholeplasmatales	Acholeplasmataceae	EMP_G18	uncultured_Mollicutes_bacterium	0.000483877	0	0.000979569	0	0	0	0	0.000295601	0	0	0	0.000687338	0	0	0	0	0	0.000767701	0	0	0	0	0	0	0	0	0	0	0	0	0	0	0	0
Firmicutes	Bacilli	Bacillales	Bacillaceae	Bacillus	unclassified_Bacillus	0	0	0	0	0	0	0	0	0	3.64E-05	0	0.000935543	0.001593049	0.002211028	0.001252847	0	0	0	0	0	0	0	0	0	0	0	0	0.00292422	0.003943538	0.006701152	0.000655705	0.008730369	0.00488702	0.001172723
Firmicutes	Bacilli	Bacillales	Bacillaceae	Geobacillus	unclassified_Geobacillus	0	0	0	0	0	0	0	0	0	0	0	0	0	0	0	0	0	0	0.000361031	0	0.000483176	0	0	0.000499031	0	0.000666136	0.000260737	0	0	0	0	0	0	0
Firmicutes	Bacilli	Bacillales	Planococcaceae	Caryophanon	unclassified_Caryophanon	0	0	0	0	0	0	0	0	0	0	0	0.008286238	0	0	0	0	0	0	0	0	0	0	0	0	0	0	0	0	0	0	0	0	0	0
Firmicutes	Bacilli	Bacillales	Planococcaceae	Lysinibacillus	unclassified_Lysinibacillus	0	0	0	0	0	0	0	0	0	0.018870669	0	0.025068734	0.080865315	0.051026686	0.048006834	0.001454117	0	0.004547155	0.002584225	0	0.000676446	0	0	0	0	0	0	0.000448602	0	0.00058782	0.000235381	0	0.000204335	0
Firmicutes	Bacilli	Bacillales	Planococcaceae	Psychrobacillus	unclassified_Psychrobacillus	0	0	0	0	0	0	0	0	0	0.001308948	0	0.001241026	0.003692976	0.004441283	0.003208049	0	0	0	0	0	0	0	0	0	0	0	0	0	0	0	0	0	0	0
Firmicutes	Bacilli	Bacillales	Planococcaceae	Solibacillus	unclassified_Solibacillus	0	0	0	0	0	0	0	0	0	0.029487692	0.001751895	0.108293875	0.045492397	0.116626932	0.07095672	0.005210587	0.00258747	0.013700518	0	0	0	0	0	0	0	0.006365302	0	0	0	0	0	0	0	0
Firmicutes	Bacilli	Bacillales	Planococcaceae	unclassified_Planococcaceae	unclassified_Planococcaceae	0	0	0	0	0	0	0	0	0	0.020161437	0	0.07955934	0.065170167	0.102687841	0.077714503	0.001211765	0.000399536	0.01214543	0	0	0	0	0	0	0	0	0	0	0.000490827	0	0	0	0	0
Firmicutes	Bacilli	Erysipelotrichales	Erysipelatoclostridiaceae	Candidatus_Stoquefichus	unclassified_Candidatus_Stoquefichus	0.005090388	0.007894257	0.003218584	0	0.003753985	0.000410604	0	0	0	0	0	0.001050099	0.000488776	0	0.001044039	0	0	0	0	0	0	0	0	0	0	0	0	0	0	0	0	0	0	0
Firmicutes	Bacilli	Erysipelotrichales	Erysipelatoclostridiaceae	Erysipelatoclostridium	unclassified_Erysipelatoclostridium	0.000619363	0.003283745	0.003376015	0	0.000994206	0.000589128	0.000593835	0.001053079	0	0	0	0	0	0	0	0	0	0.000393693	0.000266023	0	0	0.000407072	0.000169351	0	0	0.000425587	0.000670466	0.000581521	0.00137093	0.000822949	0.001916675	0.00142469	0.000885453	0.001295246
Firmicutes	Bacilli	Erysipelotrichales	Erysipelatoclostridiaceae	UCG_004	unclassified_UCG_004	0.000329037	0.000464368	0	0	0.00185128	0	0.00010797	0	0	0.000218158	0	0.000515503	0	0	0.000417616	0	0	0.003110175	0	0	0	0	0	3.84E-05	0	0	0	0.001329191	0	0	0	0	0.000170279	0
Firmicutes	Bacilli	Erysipelotrichales	Erysipelatoclostridiaceae	UCG_004	uncultured_Erysipelotrichaceae_bacterium	0.000425812	0	0	0	0	0	0	0.000775953	0	0	0	0	0.00025344	0	0	0	0	0.001003917	0	0	0	0	0	0	0	0	0	0	0	0	0	0	0	0
Firmicutes	Bacilli	Erysipelotrichales	Erysipelotrichaceae	Breznakia	unclassified_Breznakia	0	0.00058046	0.000559754	0	0	0.000839061	0.00025193	0.000720528	0.000730597	0	0	0.000267298	0	0	0.000170843	0	0	0.000196847	7.60E-05	6.01E-05	0.000270578	0	0.000131718	0	0	0.000185038	0	0	0	0	0	0	0	0
Firmicutes	Bacilli	Erysipelotrichales	Erysipelotrichaceae	Catenisphaera	uncultured_rumen_bacterium	0	0	0	0	0	0	0	0	0	0	0	0	0	0	0	0	0	0	0	0	0	0	0	0	0	0	0	0.002326084	0.002471058	0.001528333	0.001967114	0.001325293	0.005568137	0.00099769
Firmicutes	Bacilli	Erysipelotrichales	Erysipelotrichaceae	Dielma	unclassified_Dielma	0.001258081	0.00058046	0.000804646	0	0.000822791	0	0	0.001662756	0	0	0	0	0	0	0	0	0	0	0	0	0	0	0	0	0	0	0	0	0	0	0	0	0.001123844	0
Firmicutes	Bacilli	Erysipelotrichales	Erysipelotrichaceae	Erysipelothrix	unclassified_Erysipelothrix	0	0	0	0	0	0	0	0	0	0.001181689	0.000977373	0	0.000778421	0	0	0.009451763	0.015087232	0.001751934	0	0	0	0	0	0	0	0.006587347	0	0	0	0	0	0	0	0
Firmicutes	Bacilli	Erysipelotrichales	Erysipelotrichaceae	Erysipelotrichaceae_UCG_009	unclassified_Erysipelotrichaceae_UCG_009	0	0	0	0	0	0	0	0	0	0	0	0	0	0	0	0	0	0	0	0	0	0	0	0	0	0	0	0.005050925	0.004434365	0.003291794	0.00680924	0.005864423	0	0
Firmicutes	Bacilli	Erysipelotrichales	Erysipelotrichaceae	Erysipelotrichaceae_UCG_009	uncultured_rumen_bacterium	0	0.000729721	0.000559754	0	0.001045631	0	0	0	0	0	0	0	0	0	0	0	0	0	0	0	0	0	0	0	0	0	0.000186241	0.00860651	0.004112789	0.006684357	0.002219308	0.003031608	0.003524784	0.007771477
Firmicutes	Bacilli	Erysipelotrichales	Erysipelotrichaceae	Faecalitalea	unclassified_Faecalitalea	0.000367747	0.000132677	0	0	0.00287977	0.000160671	0.000593835	0.000794428	0.001198928	0	3.69E-05	0.000477318	0.000362056	0.000307621	0.000930144	0.000675126	0.001693271	0.000866125	0.000418036	0.000300619	0.000270578	0	0.000620954	0	0.001462584	0	0.001005699	0	0	0	0	0	0.000510838	0
Firmicutes	Bacilli	Erysipelotrichales	Erysipelotrichaceae	Turicibacter	unclassified_Turicibacter	0.004393605	0.006733337	0.004005737	0.001592826	0.010884843	0.001178256	0.008511634	0.001053079	0.003727918	0.000399956	0.000202851	0.000687338	0	0.000384527	0	0.000657815	0.000304408	0	0.002318202	0.005050404	0.00456118	0.003822941	0.004685383	0.006871269	0.003628689	0.002535018	0.004749134	0.001644873	0.000795478	0.000789359	0.000790208	0.000795176	0.000306503	0.000245047
Firmicutes	Bacilli	Erysipelotrichales	Erysipelotrichaceae	[Anaerorhabdus]_furcosa_group	unclassified_[Anaerorhabdus]_furcosa_group	0.001432277	0.002786208	0.001889169	0.002241756	0.001799856	0.001017585	0.001745515	0.003103811	0.002866188	0.000254518	0.000663876	0.000954636	0.000380159	0.000307621	0.000645406	0.000588571	0.000247332	0	0.000988086	0.001042147	0.000811735	0.001044229	0.001016107	0	0.000277706	0.001480303	0.000875331	0.000847359	0.001083204	0.000856538	0.002521941	0.001143065	0.000544894	0.000280053
Firmicutes	Bacilli	Erysipelotrichales	Erysipelotrichaceae	unclassified_Erysipelotrichaceae	unclassified_Erysipelotrichaceae	0.000445167	0.000116092	0	0.001317523	0	0.002070874	0.00017995	0.001884457	0.00327832	0	0.000202851	0.000229113	0	0.000249942	0	0	0.00017123	0	0.000551048	0.00094194	0.000212597	0	0.00041397	0.000729353	0.000610953	0.000370076	0.000409729	0.001046738	0	0.000184744	0.000874273	0.000281625	0.000323531	0.000805153
Firmicutes	Bacilli	Erysipelotrichales	Erysipelotrichaceae	unclassified_Erysipelotrichaceae	uncultured_rumen_bacterium	0	0	0	0	0.000377113	0	0	0.000646627	0.000505798	0	0	0	0	0	0	0	0	0	0	0	0	0	0	0	0	0	0	0	0	0	0	0	0	0
Firmicutes	Bacilli	Izemoplasmatales	unclassified_Izemoplasmatales	unclassified_Izemoplasmatales	unclassified_Izemoplasmatales	0.000580653	0.000298522	0.000367338	0	0.00173129	0.001196108	0	0.000351026	0.000355932	0	0	0.000572781	0	0	0	0	0.001008352	0	0	0	0	0.000761048	0	0	0	0.000906685	0.000577346	0	0	0	0	0	0	0
Firmicutes	Bacilli	Lactobacillales	Aerococcaceae	unclassified_Aerococcaceae	unclassified_Aerococcaceae	0	0	0	0	0	0	0	0	0	0	0.001383075	0.000362762	0.00025344	0	0	0.002129243	0.001579118	0.001712565	0	0	0	0	0	0	0	0	0	0	0	0	0	0	0	0
Firmicutes	Bacilli	Lactobacillales	Carnobacteriaceae	Atopostipes	unclassified_Atopostipes	0	0	0	0.011169449	0	0	0.000845765	0	0	0	0	0	0	0	0	0	0.000875174	0	0	0	0	0	0	0	0	0.000962197	0	0	0	0	0	0	0	0
Firmicutes	Bacilli	Lactobacillales	Carnobacteriaceae	Jeotgalibaca	unclassified_Jeotgalibaca	0	0	0	0	0	0	0	0	0	0.00218158	0.000958932	0.000610967	0	0	0	0.003912268	0.001541067	0.005314856	0	0	0	0	0	0	0	0.002720056	0	0	0	0	0	0	0	0
Firmicutes	Bacilli	Lactobacillales	Enterococcaceae	Enterococcus	unclassified_Enterococcus	0	0	0	0	0.000274264	0	0.00014396	0	0	0	0	0	0	0	0	0	0.00165522	0	0	0	0	0	0	0	0	0	0	0	0	0	0	0	0	0
Firmicutes	Bacilli	Lactobacillales	Streptococcaceae	Streptococcus	unclassified_Streptococcus	0	0	0	0	0.000137132	0	0	0	0	0	0	0	1.81E-05	0	0	0	0	0	0	0	0	0	0	0	0	0	0	0.003422666	0.001810981	0.002754358	0.00200074	0.003445762	0.002196605	0.001575299
Firmicutes	Bacilli	Paenibacillales	Paenibacillaceae	Paenibacillus	unclassified_Paenibacillus	0	0	0	0	0	0	0	0	0	0	0	0.00225294	0	0	0	0	0	0	0	0	0	0	0	0	0	0	0	0	0	0	0	0	0	0
Firmicutes	Bacilli	RF39	unclassified_RF39	unclassified_RF39	unclassified_RF39	0.001045175	0.010846311	0.0004548	0.000766916	0.001748432	0.001928055	0.008385669	0.003584163	0.011146288	0.001763444	0.000313497	0.000477318	0	0	0.000835232	0.000900168	0	0	0.002584225	0.002164459	0.001604144	0.003044194	0.003198856	0.002130477	0.003943422	0.004015321	0.00188103	0.011696878	0.012676867	0.007859998	0.013299035	0.00717315	0.006487646	0.017503326
Firmicutes	Bacilli	RF39	uncultured_Erysipelotrichaceae_bacterium	uncultured_Erysipelotrichaceae_bacterium	uncultured_Erysipelotrichaceae_bacterium	0.000870979	0.001011659	0	0.000629265	0.000839933	0	0	0.000480352	0	0	0	0	0	0	0	0	0.000627842	0	0	0	0.001198276	0.000265482	0.001919314	0	0.000722035	0.001110227	0.000148992	0.003223287	0.000897028	0.000990897	0.001883049	0.001225896	0.000681118	0.001330253
Firmicutes	Bacilli	RF39	uncultured_Firmicutes_bacterium	uncultured_Firmicutes_bacterium	uncultured_Firmicutes_bacterium	0.000580653	0	0	0.002359743	0	0	0.006856094	0.00277126	0.002304191	0	0.000313497	0	0	0.000173037	0	0.00074437	0.000285383	0	0	0.000220454	0.000270578	0	0	0	0.001092309	0.00083267	0.00078221	0	0	0	0	0	0	0.003255619
Firmicutes	Bacilli	RF39	uncultured_prokaryote	uncultured_prokaryote	uncultured_prokaryote	0.001838733	0.000447783	0.000419815	0	0.000617093	0	0.003491029	0.000942228	0.00166726	0.000472676	0.000405702	0	0	0.00078828	0	0.000328908	0.000361485	0	0.001406122	0.000901858	0.001797414	0.001433603	0	0.001957736	0.002277187	0.00205392	0.000242113	0.00142888	0.003486562	0.00638205	0.004085544	0.005450268	0.000561922	0.006301197
Firmicutes	Bacilli	RF39	uncultured_rumen_bacterium	uncultured_rumen_bacterium	uncultured_rumen_bacterium	0.00209035	0.004826111	0.006472152	0.001081549	0.001936988	0.002731411	0.00151158	0.003768914	0.00161106	0	0	9.55E-05	0.000615496	0.000249942	0.000341686	0.000207731	0	0	0.001254109	0.00046095	0.000154616	0.002761013	0.00146771	0.000364676	0.002554893	0.003460208	0.000260737	0.002841145	0.00451899	0.008195895	0.010911598	0.006908091	0.0011579	0.001697823
Firmicutes	Bacilli	RF39	unidentified_rumen_bacterium_RF39	unclassified_unidentified_rumen_bacterium_RF39	unclassified_unidentified_rumen_bacterium_RF39	0	0.000480953	0	0	0.00080565	0.001981612	0	0	0	0	0.00073764	0	0	0	0.000797267	0.000657815	0	0.000413378	0.001596139	0.001302684	0.001062987	0.001398205	0	0.002706282	0.001184878	0.00122125	0.000391105	0.006064433	0.00468824	0.002955897	0.002471502	0.002783116	0.004205902	0.007894
Firmicutes	Bacilli	RF39	unidentified_rumen_bacterium_RF9	unclassified_unidentified_rumen_bacterium_RF9	unclassified_unidentified_rumen_bacterium_RF9	0	0	0	0	0	0	0	0	0	0	0	0	0.000235337	0	0	0.000692437	0	0	0.000323028	0	0.00104366	0	0	0	0.001055282	0.000721648	0.001564421	0	0.000795478	0.000487051	0.002252934	0.000414154	0	0.00015753
Firmicutes	Bacilli	Staphylococcales	Staphylococcaceae	Aliicoccus	unclassified_Aliicoccus	0	0	0	0.002182762	0	0.000214228	0	0	0	0	0	0	0	0	0	0	0	0	0	0	0	0	0	0	0	0	0	0	1.69E-05	0	0	0	0	0
Firmicutes	Clostridia	Christensenellales	Christensenellaceae	Christensenellaceae_R_7_group	Christensenella_sp._Marseille_P3954	0	0	0	0	0	0	0	0	0	0	0	0	0	0	0	0	0	0	0	0	0	0	0	0	0	0	0	0.001063353	0.001235529	0.000571025	0.000605266	0.000662647	0.001055732	0.000665126
Firmicutes	Clostridia	Christensenellales	Christensenellaceae	Christensenellaceae_R_7_group	Christensenellaceae_R_7_group_bacterium_AC2043	0	0	0	0	0	0	0	0	0	0	0	0	0	0	0	0	0	0	0	0	0	0	0	0	0	0	0	0.005997973	0.004468215	0.002636794	0.002824574	0.002037638	0.004852964	0.002222922
Firmicutes	Clostridia	Christensenellales	Christensenellaceae	Christensenellaceae_R_7_group	Christensenellaceae_R_7_group_bacterium_YE57	0.001335501	0.001310181	0.000787154	0	0.002571223	0.001374632	0.003401055	0.00142258	0.00155486	0.000509035	0.00036882	0	0	0	0	0.000502017	0.000247332	0.00029527	0.000494043	0.000501032	0.001024333	0.000637157	0.00052687	0.000748546	0	0.00068464	0.00068909	0.000764285	0.00164173	0.001797051	0.000739769	0.00142469	0.001140872	0.001400266
Firmicutes	Clostridia	Christensenellales	Christensenellaceae	Christensenellaceae_R_7_group	unclassified_Christensenellaceae_R_7_group	0.025897108	0.01573876	0.015900504	0.032013844	0.007130858	0.026600018	0.021773947	0.015629907	0.028961616	0.010489765	0.006251498	0.005498702	0.003457639	0.007902023	0.007517084	0.008620839	0.005441297	0.016338261	0.028331465	0.028458625	0.027502368	0.014583813	0.024612374	0.024298958	0.019050617	0.016856947	0.013539688	0.085034974	0.105917	0.03416076	0.039006019	0.040752767	0.057316056	0.043968354
Firmicutes	Clostridia	Christensenellales	Christensenellaceae	Christensenellaceae_R_7_group	uncultured_Ruminococcus_sp.	0	0	0	0	0	0	0	0	0.000168599	0	0	0	0	0.0003653	0.000322703	0	0	0	0.000931081	0.002264665	0.002415879	0	0.000508054	0.000460644	0	0	0	0	0.000389276	0	0	0	0.000119196	0
Firmicutes	Clostridia	Christensenellales	Christensenellaceae	Christensenellaceae_R_7_group	uncultured_prokaryote	0.013509852	0.017977677	0.012314582	0.008514739	0.0189242	0.010372222	0.021809937	0.010031962	0.012176617	0.001745264	0.003964815	0.003035742	0.002208545	0.003479966	0.002201974	0.003410252	0.000266357	0.003228283	0.005073441	0.009679941	0.007112348	0.009929028	0.007639621	0.006775302	0.004961677	0.004200359	0.005605841	0.008739429	0.010138108	0.004467435	0.004505868	0.003429196	0.005789501	0.006458727
Firmicutes	Clostridia	Christensenellales	Christensenellaceae	Christensenellaceae_R_7_group	uncultured_rumen_bacterium_4C0d_15	0	0	0	0	0	0	0	0	0	0	0	0	0	0	0	0	0	0	0	0	0	0	0	0	0	0	0	0.000531676	0	0	0.000218568	0	0.000834369	0.000665126
Firmicutes	Clostridia	Christensenellales	Christensenellaceae	Christensenellaceae_R_7_group	uncultured_sludge_bacterium	0	0	0	0	0	0	0	0	0	0	0	0	0	0	0	0	0	0	0	0	0	0	0	0.000307096	0	0	0	0.000930433	0.001066279	0.000671795	0.000941525	0.000977404	0.001140872	0
Firmicutes	Clostridia	Christensenellales	Christensenellaceae	unclassified_Christensenellaceae	unclassified_Christensenellaceae	0.000967754	0.001144336	0.000122446	0.002635046	0.000754225	0.001767384	0.00331108	0.001367155	0.002660123	0.000381777	0	0.000190927	0.000506879	0.000634469	0.000588459	0.000207731	9.51E-05	0.000413378	0.001577137	0.001062188	0.001256257	0.000849542	0.000790306	0.003454828	0	0.000758655	0.000484225	0.004868161	0.002454133	0.00186423	0.002303373	0.002567756	0.002179577	0.001855353
Firmicutes	Clostridia	Clostridia_UCG_014	unclassified_Clostridia_UCG_014	unclassified_Clostridia_UCG_014	unclassified_Clostridia_UCG_014	0.024600317	0.046503143	0.029019731	0.009281655	0.028626281	0.020244577	0.041730399	0.017625215	0.03122834	0.002526997	0.002323566	0.000152742	0.000506879	0.004114435	0.001537585	0.002111932	0.00110348	0.001358241	0.011419994	0.010120849	0.013586904	0.006318472	0.009502484	0.015258824	0.004313696	0.011028255	0.002812232	0.052818715	0.069578905	0.104380101	0.077188204	0.100689152	0.103189334	0.104442344
Firmicutes	Clostridia	Clostridia_UCG_014	uncultured_Clostridiales_bacterium	uncultured_Clostridiales_bacterium	uncultured_Clostridiales_bacterium	0	0	0	0	0	0	0	0	0	0	0	0	0	0	0	0	0	0	0	0	0	0	0	0	0	0	0	0.010567066	0	0	0	0	0	0
Firmicutes	Clostridia	Clostridia_UCG_014	uncultured_Ruminococcaceae_bacterium	uncultured_Ruminococcaceae_bacterium	uncultured_Ruminococcaceae_bacterium	0	0	0	0	0	0	0	0.000775953	0	0	0	0	0	0	0	0.000346218	0	0.000688963	0	0.000982023	0	0	0.000432786	0.00203451	0	0	0	0.00642996	0.009511881	0.006197306	0.004371364	0.005914121	0.004495377	0.006301197
Firmicutes	Clostridia	Clostridia_UCG_014	uncultured_rumen_bacterium	uncultured_rumen_bacterium	uncultured_rumen_bacterium	0	0	0.001661769	0.00287102	0.001799856	0.002160136	0	0.021856005	0.005938443	0	0.00055323	0.000305483	0	0	0	0.000138487	0.000627842	0	0.001216106	0.00078161	0.002783093	0.003893736	0.006096643	0.001170803	0.004776539	0.005440113	0.004656014	0.012511007	0.017568208	0.021749353	0.015114832	0.022712213	0.017998536	0.020986487
Firmicutes	Clostridia	Clostridia_UCG_014	unidentified_rumen_bacterium_JW32	unclassified_unidentified_rumen_bacterium_JW32	unclassified_unidentified_rumen_bacterium_JW32	0.000619363	0.004593927	0.005492583	0.000550607	0.005022455	0.000357047	0.00219539	0.002752785	0.001142729	0.000309057	0	0	0	0	0.000132878	0.000138487	0.000190255	0	0.001349117	0	0.002454533	0.000318578	0.002935421	0.000959674	0	0.001313769	0.000614594	0.000299068	0.010358134	0.000537436	0.004085544	0.004472865	0.002043353	0.004235805
Firmicutes	Clostridia	Clostridia_UCG_014	unidentified_rumen_bacterium_RFN25	unclassified_unidentified_rumen_bacterium_RFN25	unclassified_unidentified_rumen_bacterium_RFN25	0	0	0	0	0	0	0	0	0	0	0	0	0	0	0	0	0	0	0	0	0	0	0	0	0	0	0	0.002243009	0.002487983	0	0.000874273	0	0	0.002292936
Firmicutes	Clostridia	Clostridia_vadinBB60_group	unclassified_Clostridia_vadinBB60_group	unclassified_Clostridia_vadinBB60_group	unclassified_Clostridia_vadinBB60_group	0.004277475	0.000995074	0.001469353	0.000707923	0.000994206	0.001928055	0.00226737	0.000424927	0.001573594	0.005363051	0.005882678	0.002883	0.005973932	0.005075752	0.003663629	0.001627227	0.002644546	0.008287238	0.000513045	0.000240495	0.002918382	0.002442435	0	0.000537418	0.002962195	0.000314564	0	0	0	0	0	0	0	0.000542603
Firmicutes	Clostridia	Clostridia_vadinBB60_group	uncultured_Clostridiales_bacterium	uncultured_Clostridiales_bacterium	uncultured_Clostridiales_bacterium	0.001625827	0	0	0	0.000205698	0	0.000125965	0	0	0.000345417	0.000405702	0.00021002	0.000199131	0.000230716	0.000322703	0.000536639	0	0.000374008	0	0	0.000270578	0	0	0	0	0.000222045	0	0	1.69E-05	0	0	0	0	0
Firmicutes	Clostridia	Clostridia_vadinBB60_group	uncultured_rumen_bacterium	uncultured_rumen_bacterium	uncultured_rumen_bacterium	0	0	0	0.000688258	0	0.000232081	0.000737795	0.000683578	9.37E-05	0.002272479	0.00129087	0.001737437	0.001158581	0.001922633	0.000816249	0.001402185	0.001978653	0.002027519	0.000437038	0	0.000773081	0	0	0	0.000407302	0	0	0	0	0	0	0	0	0
Firmicutes	Clostridia	Clostridiales	Clostridiaceae	Clostridium_sensu_stricto_1	Clostridium_butyricum	0	0	0	0	0	0	0	0	0	0	0	0	0	0	0	0	0	0	0	0.000901858	0	0	0.002163932	0	0	0	0	0	0	0	0	0	0	0
Firmicutes	Clostridia	Clostridiales	Clostridiaceae	Clostridium_sensu_stricto_1	unclassified_Clostridium_sensu_stricto_1	0.031277823	0.011476525	0.012437028	0.003342969	0.013867462	0.001481746	0.012344568	0.00277126	0.00747457	0.002799695	0.005606063	0.031884833	0.001629254	0.002211028	0.002505695	0.002025378	0.008770762	0.003779453	0.00286925	0.003066317	0.002357898	0.012247571	0.015091073	0.004990307	0.005257896	0.013193198	0.006462547	0	0	0	0	0	0	0
Firmicutes	Clostridia	Clostridiales	Clostridiaceae	Clostridium_sensu_stricto_13	unclassified_Clostridium_sensu_stricto_13	0	0	0	0	0	0	0	0	0	0	0	0	0	0.000634469	0.001006074	0.000276975	0	0.000177162	0	0	0	0	0	0	0	0	0	0	0	0	0	0	0	0
Firmicutes	Clostridia	Clostridiales	Clostridiaceae	Clostridium_sensu_stricto_6	Clostridium_bornimense	0	0.000713137	0	0	0.000154273	0.000196376	0.00115168	0	0.000318465	0	0	0	0	0	0	0	0	0	0	0.000240495	0	0.001061928	0.002540268	0	0.003665716	0	0.004674638	0	0	0	0	0	0	0
Firmicutes	Clostridia	Clostridiales	Clostridiaceae	Proteiniclasticum	unclassified_Proteiniclasticum	0	0	0	0	0	0	0	0	0	0	0	0	0	0	0	0	0	0	0	0	0	0	0	0	0	0.005514128	0	0	0	0	0	0	0	0
Firmicutes	Clostridia	Clostridiales	unclassified_Clostridiales	uncultured_Bacillus_sp.	unclassified_Clostridiales	0	0	0	0	0	0	0	0	0	0.000290877	0.002286684	0	0	0	0	0.001557983	0.002454291	0.000826755	0	0	0	0	0	0	0	0	0	0	0	0	0	0	0	0
Firmicutes	Clostridia	Eubacteriales	Anaerofustaceae	Anaerofustis	unclassified_Anaerofustis	0.000483877	0.000696552	0.000699692	0.002497394	0.000668518	0.000553423	0.00057584	0.000831378	0.001461194	1.82E-05	5.53E-05	0	0.000162925	0.000153811	3.80E-05	0	7.61E-05	0	0.000247021	0.000120248	0.000212597	0.000176988	0	0.000518224	0	0.000166534	5.59E-05	0	0	0	0	0	0	0
Firmicutes	Clostridia	Lachnospirales	Defluviitaleaceae	Defluviitaleaceae_UCG_011	unclassified_Defluviitaleaceae_UCG_011	0.001296791	0.000912152	0.001276938	0.001278194	0.001971271	0.001463894	0.0017995	0.002198533	0.001648527	0.001854343	0.000497907	0.001088285	0.001375815	0.001403522	0.001309795	0.00074437	0.000989327	0	0.002280198	0.001603303	0.002647803	0.000637157	0.001919314	0.00241838	0.000833117	0.001813371	0.001918278	0	0	0	0.000504388	0.001408124	0.001583599	0.00031506
Firmicutes	Clostridia	Lachnospirales	Lachnospiraceae	Acetitomaculum	unclassified_Acetitomaculum	0	0.000663383	0.000524769	0	0	0	0	0	0	0	0	0	0	0	0	0	0	0	0	0	0	0	0	0	0	0	0	0.003339592	0.006922348	0.005290383	0.003379401	0.006079783	0.006027892	0.007351397
Firmicutes	Clostridia	Lachnospirales	Lachnospiraceae	Agathobacter	unclassified_Agathobacter	0.00334843	0.011161418	0.010267982	0	0.002948336	0	0	0.001681231	0	0	0	0	0	0	0	0	0	0	0	0.001122312	0	0.00132741	0.002145115	0	0	0.001091723	0.005196111	0	0	0	0	0	0	0
Firmicutes	Clostridia	Lachnospirales	Lachnospiraceae	Anaerocolumna	unclassified_Anaerocolumna	0	0	0	0	0	0	0	0	0	0	0.000682317	0.004524973	0.002226647	0.004748904	0.004233106	0	0	0.001318872	0	0	0	0	0	0	0	0	0	0	0	0	0	0	0	0
Firmicutes	Clostridia	Lachnospirales	Lachnospiraceae	Anaerosporobacter	unclassified_Anaerosporobacter	0	0.001675042	0.002378953	0	0.001474168	0	0.000377895	0	0	0.000545395	0	0.001412861	0	0	0	0.001229075	0	0.000629909	0.001710149	0.002825821	0.003575501	0.004672484	0.002201566	0	0.003073277	0.005292082	0.003668939	0	0	0	0	0	0	0
Firmicutes	Clostridia	Lachnospirales	Lachnospiraceae	Anaerosporobacter	uncultured_Lachnospiraceae_bacterium	0	0	0	0	0.000154273	0	0.00097173	0	0.000730597	0.000581755	0	0	0	0	0	0	0	0	0	0.001803716	0.001700779	0	0	0.003569989	0.002369756	0.002683049	0	0	0	0	0	0	0	0
Firmicutes	Clostridia	Lachnospirales	Lachnospiraceae	Anaerosporobacter	uncultured_anaerobic_bacterium	0	0	0	0	0	0	0	0	0	0	0.00239733	0	0	0	0	0	0	0	0	0	0	0	0	0	0	0.002016912	0	0	0	0	0	0	0	0
Firmicutes	Clostridia	Lachnospirales	Lachnospiraceae	Blautia	unclassified_Blautia	0.002516161	0.00794401	0.003498461	0.001081549	0.004662484	0.001088994	0.003473034	0.001625806	0.001367528	0	0.00036882	0	0	0	0	0	0	0.000944863	0.000304026	0	0.000637792	0.000460169	0.000903206	0.000614192	0.000518384	0.000906685	0.001080195	0.000249223	0	0.000319102	0.000403511	0.000695779	0.000306503	0.000192537
Firmicutes	Clostridia	Lachnospirales	Lachnospiraceae	Cellulosilyticum	Cellulosilyticum_bacterium_PS7	0	0	0	0	0	0	0	0	0	0	0	0	0	0	0	0	0	0	0.000399035	0.000801651	0.000927698	0	0.001223092	0.00044145	0.002406783	0.000814166	0.003687563	0	0	0	0	0	0	0
Firmicutes	Clostridia	Lachnospirales	Lachnospiraceae	Cellulosilyticum	unclassified_Cellulosilyticum	0	0	0.000174923	0	0	0	0.000341905	0	0.000468331	5.45E-05	7.38E-05	0.00379945	0.001212889	0.00136507	0.000816249	0	0	0	0.004218367	0.002825821	0.004541853	0.001752181	0.003085955	0.002571928	0.006813048	0.001480303	0.006779156	0.000348913	0	0	0.000504388	0	0	0
Firmicutes	Clostridia	Lachnospirales	Lachnospiraceae	Coprococcus	unclassified_Coprococcus	0	0.001542365	0.000437308	0	0.001079914	0.000696242	0	0.000886803	0.001067796	0.001508926	0.002139156	0.003780357	0.001176684	0.001307391	0.00149962	0	0.000780046	0.000905494	0.00045604	0.000280578	0.000425195	0.001451302	0.000771489	0.005681273	0.001351501	0.002683049	0.001434052	0	0	0.000537436	0.001445913	0	0.001089788	0
Firmicutes	Clostridia	Lachnospirales	Lachnospiraceae	Coprococcus	uncultured_Lachnospiraceae_bacterium	0	0	0	0	0.002056978	0	0	0	0	0	0.00073764	0.001393768	0	0	0	0	0.000456612	0.002184996	0.000532046	0.000661362	0.002396552	0	0	0.001900155	0	0	0	0	0	0	0	0	0.000459754	0
Firmicutes	Clostridia	Lachnospirales	Lachnospiraceae	Dorea	unclassified_Dorea	0	0	0.004600476	0	0.004833899	0	0.002789225	0	0	0	0	0	0	0	0	0	0	0	0	0	0	0	0	0	0	0	0	0	0	0	0	0	0	0
Firmicutes	Clostridia	Lachnospirales	Lachnospiraceae	Dorea	uncultured_Lachnospiraceae_bacterium	0.009077536	0.001077997	0	0.006449964	0	0.001803088	0	0.006189148	0.001461194	0.000436316	0.001327752	0.000496411	0.00083273	0.000519111	0.000626424	0.001055966	0.002473317	0.003169229	0	0.000581197	0.000676446	0.000424771	0.00141126	0.001170803	0.000462843	0.001017708	0	0.001711333	0.002115632	0.000655	0.002252934	0.001225896	0.00190713	0.001067703
Firmicutes	Clostridia	Lachnospirales	Lachnospiraceae	Frisingicoccus	unclassified_Frisingicoccus	0.005148454	0.005124633	0	0.005034118	0.002519798	0.001374632	0.003293085	0.003639588	0.004327382	0	0.000645435	0.000343669	0	0	0	0.000605882	0.000361485	0.000570855	0.000285025	0.001823757	0.000444522	0.003433568	0.003443474	0	0.003480579	0.002257462	0.004171788	0	0.000270801	0.000201538	0	0	0	0
Firmicutes	Clostridia	Lachnospirales	Lachnospiraceae	GCA_900066575	unclassified_GCA_900066575	0.000251616	0.001774549	0.000804646	0	0.000359971	0	0	0.000443402	0	0	0	0	0	0	0	0	0	0	0	0	0	0	0	0	0	0	0	0	0	0	0	0	0	0
Firmicutes	Clostridia	Lachnospirales	Lachnospiraceae	Lachnospiraceae_AC2044_group	unclassified_Lachnospiraceae_AC2044_group	0	0.000729721	0	0	0	0	0	0.001219354	0.001198928	0	0	0	0	0	0	0	0	0	0	0	0	0.001504398	0	0	0.000666494	0.001295265	0.000912579	0	0	0	0	0	0	0
Firmicutes	Clostridia	Lachnospirales	Lachnospiraceae	Lachnospiraceae_FE2018_group	Lachnospiraceae_FE2018_group_bacterium_FE2018	0	0	0	0	0	0	0	0	0	0	0	0	0	0	0	0	0	0	0	0	0	0	0	0	0	0	0	0.000249223	0.000406201	0.000201538	0.000336259	0.00021536	0.000834369	0.00026255
Firmicutes	Clostridia	Lachnospirales	Lachnospiraceae	Lachnospiraceae_NK3A20_group	unclassified_Lachnospiraceae_NK3A20_group	0	0	0.001434369	0	0	0.000839061	0	0.001902932	0.002566456	0	0	0	0	0	0	0	0	0	0	0	0	0	0	0	0	0	0	0.027663781	0.011678289	0.008431023	0.016308551	0.006195746	0.019445911	0.010379472
Firmicutes	Clostridia	Lachnospirales	Lachnospiraceae	Lachnospiraceae_NK4A136_group	uncultured_Lachnospiraceae_bacterium	0	0	0	0	0	0	0	0	0	0	0	0	0	0	0	0	0	0	0	0	0	0	0	0	0	0	0	0	0	0.000974102	0.002471502	0.001109933	0.000595978	0
Firmicutes	Clostridia	Lachnospirales	Lachnospiraceae	Lachnospiraceae_NK4B4_group	unclassified_Lachnospiraceae_NK4B4_group	0	0	0	0	0	0	0	0	0	0	0	0	0	0	0	0.00019042	0	0.000452747	0.000722063	0.001142353	0	0	0.000301069	0.000191935	0	0.000647632	0	0	0	0	0	0	0	0
Firmicutes	Clostridia	Lachnospirales	Lachnospiraceae	Lachnospiraceae_UCG_001	unclassified_Lachnospiraceae_UCG_001	0	0	0.002623846	0	0	0	0	0	0	0	0	0	0	0	0	0	0	0	0	0	0	0	0	0	0	0	0	0	0	0	0	0	0	0
Firmicutes	Clostridia	Lachnospirales	Lachnospiraceae	Lachnospiraceae_UCG_001	uncultured_Lachnospiraceae_bacterium	0	0.000215599	0	0.000452284	0	0.000999732	0.000449875	0.000406451	0.000842997	0.000818093	0.000700758	0.00154651	0.00057929	0.000519111	0.001100987	0.000502017	0.000799072	0.001830673	0.00068406	0.000581197	0	0.001008832	0	0.000806127	0	0	0.000335233	0.002326084	0.001929456	0	0	0	0	0
Firmicutes	Clostridia	Lachnospirales	Lachnospiraceae	Lachnospiraceae_UCG_002	uncultured_rumen_bacterium	0	0	0	0	0	0	0	0	0	0	0	0	0	0	0	0	0	0	0	0	0	0	0	0	0	0	0	0.001229501	0.001032428	0.00062141	0.000638892	0	0	0
Firmicutes	Clostridia	Lachnospirales	Lachnospiraceae	Lachnospiraceae_UCG_008	uncultured_Lachnospiraceae_bacterium	0	0	0	0	0	0	0	0	0	0	0	0	0	0	0	0	0	0	0	0	0	0	0	0	0	0	0	0.000814129	0.000389276	0.000319102	0.000504388	0.000165662	0.000868425	0.000332563
Firmicutes	Clostridia	Lachnospirales	Lachnospiraceae	Lachnospiraceae_UCG_010	unclassified_Lachnospiraceae_UCG_010	0.000774204	0.006584075	0.000752169	0.004385189	0.000497103	0.000482014	0.0007198	0.002217008	0.002079392	0.003508708	0.00295056	0.002959371	0.001864591	0.002980082	0.003397874	0.001834958	0.004261715	0.004212516	0.005757501	0.005190693	0.005720802	0.006159183	0.005136986	0.00742788	0.008405228	0.006069241	0.002942601	0.000797514	0.007260849	0.003980384	0.004657184	0.004356901	0.009569704	0.007456417
Firmicutes	Clostridia	Lachnospirales	Lachnospiraceae	Lachnospiraceae_XPB1014_group	unclassified_Lachnospiraceae_XPB1014_group	0	0	0	0	0	0	0	0	0	0	0	0	0	0	0	0	0	0	0	0	0	0	0	0	0	0	0	0.001345806	0.000981653	0.000369487	0.000588453	0.000579816	0.000613006	0.001505286
Firmicutes	Clostridia	Lachnospirales	Lachnospiraceae	Marvinbryantia	unclassified_Marvinbryantia	0.002941973	0.00369836	0.001766723	0	0.002828345	0.000892618	0.0003599	0.000794428	0	0	0	0	0	0	0	0	0	0	0	0	0	0	0	0	0	0	0	0.002807915	0.000693927	0.001024487	0	0.000728911	0.00049381	0.000770146
Firmicutes	Clostridia	Lachnospirales	Lachnospiraceae	Roseburia	Roseburia_sp._499	0	0	0	0	0	0	0	0	0	0	0	0	0	0	0	0	0	0	0	0	0	0.000230084	0.001110191	0	0	0	0.001173315	0	0	0	0	0	0	0
Firmicutes	Clostridia	Lachnospirales	Lachnospiraceae	Roseburia	unclassified_Roseburia	0.000445167	0.005970446	0.003743353	0	0.004713909	0.011032759	0.000629825	0.006835775	0.00327832	0	0	0	0	0	0	0	0	0	0	0.000921899	0	0.021114671	0.001185458	0	0.000888658	0	0.022870339	0	0.002471058	0	0	0	0	0
Firmicutes	Clostridia	Lachnospirales	Lachnospiraceae	Roseburia	uncultured_Lachnospiraceae_bacterium	0.002729067	0.001393104	0	0.004247537	0.000274264	0.000821209	0	0.000147801	0	0	0	0	0.000742216	0	0	0	0	0	0.003401296	0.000841734	0	0.000230084	0.00193813	0	0.002480838	0.004070832	0.0014713	0	0	0	0	0	0	0
Firmicutes	Clostridia	Lachnospirales	Lachnospiraceae	Shuttleworthia	unclassified_Shuttleworthia	0	0	0	0	0	0	0	0	0	0	0	0	0	0	0	0	0	0	0	0	0	0	0	0	0	0	0	0.001578414	0.000507752	0	0.000403511	0.000182228	0.000595978	0
Firmicutes	Clostridia	Lachnospirales	Lachnospiraceae	Syntrophococcus	unclassified_Syntrophococcus	0	0	0	0	0	0	0	0	0	0	0	0	0	0	0	0	0	0	0	0	0	0	0	0	0	0	0	0.003921113	0.001861756	0.00120923	0.001563603	0.001043668	0	0.001365259
Firmicutes	Clostridia	Lachnospirales	Lachnospiraceae	Tuzzerella	unclassified_Tuzzerella	0	0.000165846	0	0	0	0.000160671	0	0.000166276	0	0.000272698	0	0	0	0.000269169	0	0.000121176	0	0.000511801	0.000551048	0.000581197	0.000463849	0	0.00047042	0.000422257	0.000925686	0.000592121	0.000186241	0	0	0	0.000184942	0	0	0.000455086
Firmicutes	Clostridia	Lachnospirales	Lachnospiraceae	XBB1006	unclassified_XBB1006	0	0	0	0	0	0	0	0	0	0	0	0	0.000199131	0.000346074	0	0	0	0	0	0.000480991	0	0	0	0.001708221	0	0	0	0	0	0.000302308	0.000403511	0	0.003354505	0.000980186
Firmicutes	Clostridia	Lachnospirales	Lachnospiraceae	[Bacteroides]_pectinophilus_group	uncultured_rumen_bacterium	0	0.003151069	0	0	0	0	0	0	0	0	0	0	0	0	0	0	0	0	0	0	0	0	0	0	0	0	0	0	0	0	0	0	0	0
Firmicutes	Clostridia	Lachnospirales	Lachnospiraceae	[Eubacterium]_hallii_group	unclassified_[Eubacterium]_hallii_group	0	0	0	0	0.000239981	0	0	0	0	0	0	0	0	0	0	0	0	0	0	0	0	0	0	0	0	0	0	0.001777793	0.000930878	0.000671795	0.000924712	0.000447286	0.001396291	0.000927676
Firmicutes	Clostridia	Lachnospirales	Lachnospiraceae	[Eubacterium]_hallii_group	unidentified_rumen_bacterium_RF24	0	0	0	0	0	0	0	0	0	0	0	0	0	0	0	0	0	0	0	0	0	0	0	0	0	0	0	0.001379035	0.000609302	0.000571025	0.000403511	0.000662647	0.000476782	0.000490093
Firmicutes	Clostridia	Lachnospirales	Lachnospiraceae	[Eubacterium]_ruminantium_group	unclassified_[Eubacterium]_ruminantium_group	0.000464522	0	0	0	0.000394254	0	0	0	0	0	0	0	0	0	0	0	0	0	0.000532046	0.000601239	0.0007151	0.000672554	0.002841337	0	0.000203651	0.000388579	0.000409729	0.000880589	0.002166407	0.004920896	0.00183261	0.006527069	0.000459754	0.001575299
Firmicutes	Clostridia	Lachnospirales	Lachnospiraceae	[Eubacterium]_ventriosum_group	uncultured_rumen_bacterium	0	0	0	0	0	0.000696242	0	0.000775953	0	0	0	0	0	0	0	0	0	0	0	0	0	0	0	0	0	0	0	0	0	0	0	0	0	0
Firmicutes	Clostridia	Lachnospirales	Lachnospiraceae	[Ruminococcus]_gauvreauii_group	uncultured_rumen_bacterium	0	0	0	0	0	0	0	0	0	0	0	0	0	0	0	0	0	0	0	0	0	0	0	0	0	0	0	0.005150614	0.002047932	0.001696282	0.002992703	0.001921675	0.001123844	0.001750333
Firmicutes	Clostridia	Lachnospirales	Lachnospiraceae	unclassified_Lachnospiraceae	unclassified_Lachnospiraceae	0.077613905	0.170953779	0.135145536	0.056633827	0.116784943	0.077407837	0.059167551	0.139006411	0.094359416	0.030142166	0.02974533	0.045268825	0.019243302	0.02243713	0.023063781	0.020253778	0.01984361	0.053620992	0.07275733	0.10028659	0.072824259	0.147802694	0.10006774	0.057887565	0.098104195	0.103750717	0.170670838	0.056274611	0.072473089	0.057253703	0.084955782	0.070273673	0.098268258	0.070940979
Firmicutes	Clostridia	Lachnospirales	Lachnospiraceae	unclassified_Lachnospiraceae	uncultured_prokaryote	0	0	0	0	0	0	0	0	0	0	0	0	0	0	0	0	0	0	0	0	0	0	0	0	0	0.010343615	0	0	0	0	0	0	0	0
Firmicutes	Clostridia	Monoglobales	Monoglobaceae	Monoglobus	unclassified_Monoglobus	0.010374327	0.006119707	0.008448783	0.023833402	0.004233947	0.021690619	0.013874143	0.015592957	0.01552987	0.014598407	0.011986649	0.006300596	0.003928313	0.005268015	0.004309036	0.002181176	0.003177261	0.005570756	0.031181713	0.020802854	0.037088576	0.033698519	0.028413367	0.03316635	0.03330618	0.03584183	0.030822811	0.010135079	0.017923634	0.044439219	0.037459229	0.035335631	0.024196707	0.054085276
Firmicutes	Clostridia	Monoglobales	Monoglobaceae	Monoglobus	uncultured_Clostridiales_bacterium	0	0	0	0	0	0.000214228	0	0.000609677	0	0	0	0.000305483	0	0	0	0.000294286	0	0	0	0.001302684	0.000657119	0.00044247	0.000696222	0.001055642	0	0	0	0.000797514	0	0.002838333	0.000756582	0.000762044	0.000357587	0.000647623
Firmicutes	Clostridia	Monoglobales	Monoglobaceae	Monoglobus	uncultured_Firmicutes_bacterium	0.002012929	0	0	0	0	0	0	0.000221701	0	0	0	0	0.000307748	0	0	0	0	0.002559005	0.003154274	0.001944005	0.002860401	0.001539796	0.002446184	0.002399186	0	0	0	0	0.000220026	0.001662692	0.001294596	0.001358426	0.001362235	0.001487783
Firmicutes	Clostridia	Oscillospirales	Butyricicoccaceae	UCG_009	unclassified_UCG_009	0.006290404	0.004046636	0.005212706	0.007983796	0.007679386	0.007658663	0.010779003	0.005616421	0.016728799	0.005635749	0.007468604	0.0047159	0.007259232	0.010151503	0.008769932	0.004241176	0.00610719	0.008621878	0.015239326	0.018778684	0.019848863	0.008814003	0.009954087	0.018310589	0.011163772	0.008696778	0.007542742	0.000980278	0.002132557	0.002334487	0.004085544	0.004224372	0.005619221	0.003168102
Firmicutes	Clostridia	Oscillospirales	Ethanoligenenaceae	Incertae_Sedis	unclassified_Incertae_Sedis	0	0	0	0	0	0	0	0	0.000224799	0	0	0	0	0	5.69E-05	0	0	0	0.000209018	0.000180372	0	0	0	0.000191935	0	0	0	0.004236795	0.001083204	0.002267307	0.001933488	0.002667153	0.00124304	0.002257929
Firmicutes	Clostridia	Oscillospirales	Hungateiclostridiaceae	Ruminiclostridium	unclassified_Ruminiclostridium	0	0	0	0	0	0	0	0	0	0	0	0	0	0	0	0	0	0	0	0	0	0	0	0	0	0	0	0.000481832	6.77E-05	0.00120923	0.00085746	0.000977404	0.000255419	0
Firmicutes	Clostridia	Oscillospirales	Hungateiclostridiaceae	Saccharofermentans	unclassified_Saccharofermentans	0.001819378	0.00409639	0.001014554	0.006076338	0.002965477	0.002660002	0.001349625	0.007020526	0.007081171	0	0	0	0.000796524	0	0	0	0	0	0.001520132	0.001182436	0.002551168	0.00118582	0.001712329	0.009481584	0	0.00083267	0.001117443	0	0	0	0	8.28E-05	0	0
Firmicutes	Clostridia	Oscillospirales	Hungateiclostridiaceae	Saccharofermentans	unidentified_rumen_bacterium_RFN72	0	0	0	0.000471949	0.00046282	0	0	0.000646627	0.001180195	0	0	0	0	0	0	0	0	0	0	0	0	0	0	0	0	0	0	0	0	0	0	0	0	0
Firmicutes	Clostridia	Oscillospirales	Hungateiclostridiaceae	unclassified_Hungateiclostridiaceae	unclassified_Hungateiclostridiaceae	0.001470987	0.000547291	0.000262385	0.000766916	0.000771367	0.001481746	0.002753235	0.000406451	0.00322212	0.000309057	0.000202851	0.000381854	0.000615496	0.001980312	0.001157935	0.000623193	0	0.000177162	0.001539134	0.003366936	0.001507509	0.000654856	0.000263435	0.000729353	0.000592439	0.000925189	0.000987075	0.002957449	0.001624805	0.004501024	0.000891086	0.003246968	0.003609924	0.002818035
Firmicutes	Clostridia	Oscillospirales	Hydrogenoanaerobacterium	unclassified_Hydrogenoanaerobacterium	unclassified_Hydrogenoanaerobacterium	0.000348392	0.000116092	0.000157431	0	0	0	3.60E-05	0	0	0	0.000442584	0	0.000615496	0.000288395	0	0	0.000190255	0	0.000513045	0.000380784	0.000676446	0.000194687	0	0.000499031	0.000388788	0	0.000167616	0	8.46E-05	0.000151154	0	0	0	0
Firmicutes	Clostridia	Oscillospirales	Oscillospiraceae	NK4A214_group	unclassified_NK4A214_group	0.011303372	0.008424963	0.004233137	0.014453425	0.002605506	0.008961885	0.006568174	0.008369206	0.010509357	0.003799585	0.004628691	0.003188483	0.004236061	0.005844805	0.005751708	0.004396974	0.006202317	0.005767603	0.010735934	0.011984688	0.00684177	0.004371604	0.007338552	0.012283833	0.006535343	0.006975927	0.004115916	0.012162095	0.020073116	0.014409996	0.018376543	0.014147505	0.019360771	0.015087867
Firmicutes	Clostridia	Oscillospirales	Oscillospiraceae	NK4A214_group	uncultured_Ruminococcaceae_bacterium	0	0	0	0	0	0	0	0	0.002641389	0	0	0	0	0	0	0	0	0	0	0	0	0	0	0	0	0	0	0	0	0	0	0	0	0
Firmicutes	Clostridia	Oscillospirales	Oscillospiraceae	Oscillibacter	unclassified_Oscillibacter	0.001819378	0.004245651	0.00668206	0	0.004011108	0.001678122	0.002645265	0	0	0.000472676	0	0.000305483	0.000506879	0.000884411	0.000493546	0	0	0.001476349	0.002565223	0.002104335	0.00403935	0.002637121	0.001919314	0.002629508	0.002665975	0.002757064	0.0014713	0.000548291	0.004045088	0.001561923	0.001328222	0.000762044	0.002417968	0.00073514
Firmicutes	Clostridia	Oscillospirales	Oscillospiraceae	Oscillospira	unclassified_Oscillospira	0	0	0	0	0	0	0	0	0.000786797	0	0.000608553	0	0.00070601	0.00078828	0.000512528	0	0	0	0.00057005	0.000641321	0	0	0	0	0	0	0	0	0	0	0	0	0	0
Firmicutes	Clostridia	Oscillospirales	Oscillospiraceae	Papillibacter	unclassified_Papillibacter	0	0.00076289	0.000419815	0.00143551	0	0.000482014	0.0010797	0.001126979	0.001798393	0.000563575	0.000534789	0.000649152	0.000470673	0.001057448	0.000607441	0	0	0	0	0.000801651	0.000773081	0.000530964	0.000827939	0.001823382	0.000444329	0.000518106	0.000465601	0.001744563	0.002741859	0.002048974	0.002353811	0.002551189	0.00165171	0.001470279
Firmicutes	Clostridia	Oscillospirales	Oscillospiraceae	UCG_002	unclassified_UCG_002	0.00882592	0.000729721	0.002396446	0.009379978	0.001919846	0.006641078	0.010581058	0.000628152	0.010940222	0.003417809	0.002544858	0.00063006	0.00237147	0.00476813	0.002714503	0.001938823	0.002359164	0.004133777	0.010184886	0.009800188	0.006667826	0.004884869	0.005927292	0.010959483	0.010015922	0.004662954	0.00404142	0.021682423	0.028451019	0.007994357	0.00995326	0.007637002	0.020535699	0.012654904
Firmicutes	Clostridia	Oscillospirales	Oscillospiraceae	UCG_005	unclassified_UCG_005	0.228041652	0.200026535	0.208140918	0.188661436	0.161987041	0.195144158	0.156880387	0.185286456	0.207077425	0.068410719	0.071292898	0.07512983	0.056679942	0.071214335	0.076480638	0.061488393	0.060139647	0.088954942	0.104490091	0.112712187	0.121296457	0.127944638	0.123306488	0.126235581	0.10713889	0.104083785	0.096509852	0.091016332	0.115107305	0.108595613	0.124836074	0.119524882	0.11141383	0.130049709
Firmicutes	Clostridia	Oscillospirales	Oscillospiraceae	UCG_005	uncultured_Ruminococcaceae_bacterium	0	0.002786208	0.004827876	0.002635046	0	0.002088726	0.003976894	0.003251612	0.010247092	0.001727084	0.005403212	0.001832901	0.003095583	0.002826271	0.002012149	0.002008067	0.006259394	0.008799039	0.006080529	0.003888009	0.009045051	0.008035256	0.003989162	0.012187866	0.006516829	0.01041763	0.010075614	0.00068121	0.001049353	0.002048974	0.001395474	0.003114439	0	0.000595113
Firmicutes	Clostridia	Oscillospirales	Oscillospiraceae	UCG_005	uncultured_rumen_bacterium	0	0	0	0.003539614	0	0	0	0	0.002697589	0.000290877	0.000700758	0.000439132	0.000470673	0.001480428	0.000892179	0.000709748	0.000437587	0.000531486	0.002945256	0.00140289	0.000657119	0.00176988	0.000922023	0.001804188	0	0	0	0.000415372	0	0	0.000521201	0	0	0.001225233
Firmicutes	Clostridia	Oscillospirales	Oscillospiraceae	UCG_007	unclassified_UCG_007	0	0	0	0	0	0	0	0	0	0	0	0	0	0	0	0	0	0	0	0	0	0	0	0	0	0	0	0	0.001235529	0.002216923	0	0.001822278	0	0
Firmicutes	Clostridia	Oscillospirales	Oscillospiraceae	unclassified_Oscillospiraceae	unclassified_Oscillospiraceae	0.007703325	0.00834204	0.004285614	0.014335437	0.004816758	0.008301348	0.007180004	0.010660114	0.011052622	0.0088354	0.008077157	0.011570185	0.008128168	0.006786895	0.010193622	0.006474285	0.007381899	0.008523454	0.019704714	0.017636331	0.01673721	0.017964284	0.018158212	0.030709583	0.020698337	0.018466776	0.014247402	0.003123598	0.007971701	0.004853717	0.008473721	0.005367438	0.013639382	0.011744731
Firmicutes	Clostridia	Oscillospirales	Oscillospiraceae	unclassified_Oscillospiraceae	uncultured_Ruminococcaceae_bacterium	0	0	0	0.000334297	0	0	0.00104371	0.000868328	0.000280999	0.003781406	0.000258174	0.000229113	0.000307748	0	0	0.003462184	0.005308118	0.004980217	0.001292112	0.000921899	0.000831062	0	0.000451603	0.000690966	1.85E-05	0	0	0	0	0	0	0	0	0
Firmicutes	Clostridia	Oscillospirales	Ruminococcaceae	Candidatus_Soleaferrea	unclassified_Candidatus_Soleaferrea	0.002729067	0.000995074	0	0.001514168	0.000565669	0.006605374	0.004570729	0	0.004308649	0.001890703	0.001770336	0.001260119	0.002679218	0.002595555	0.002164009	0.001679159	0.002568444	0.002125942	0.002280198	0.003006193	0.003749444	0.000672554	0.002653169	0.007255139	0.004295183	0.004181855	0.003296458	0.000548291	0.002623384	0.003157435	0.003463465	0.003230402	0.002281744	0.002065392
Firmicutes	Clostridia	Oscillospirales	Ruminococcaceae	Candidatus_Soleaferrea	uncultured_Acetanaerobacterium_sp.	0.000638718	0	0	0	0	0	0.00118767	0	0	0.000381777	0	0	0	0	0	0	0.000304408	0	0	0	7.73E-05	0.000212386	0	0	0	0	0.000577346	0	0	0	0	0	0	0
Firmicutes	Clostridia	Oscillospirales	Ruminococcaceae	Candidatus_Soleaferrea	uncultured_Anaerotruncus_sp.	0.000619363	0.000530706	0.0002274	9.83E-05	0.000291405	0.000410604	0.00025193	0.000739003	0.000430865	0.000236338	0.000276615	0.000458225	9.05E-05	0.000269169	0.00015186	0	0.000209281	0.000196847	0.000171015	0.000280578	0.000367214	0.00044247	0.000395153	0.000556611	0.000277706	0.000222045	0	0	0.000389276	0	0.000184942	0	0.000238391	0.00026255
Firmicutes	Clostridia	Oscillospirales	Ruminococcaceae	Caproiciproducens	unclassified_Caproiciproducens	0.000464522	0	0	0	0.000599952	0.000571276	0.00025193	0	0.000149866	0.000545395	0	0.000496411	0.000669804	0.000442206	0.000284738	0	0.000361485	0.000610224	0	0.000521073	0	0.000194687	0.000112901	0.000460644	0.000370274	0	0.000130368	0	0	0	0	0	0	0
Firmicutes	Clostridia	Oscillospirales	Ruminococcaceae	Fournierella	uncultured_Firmicutes_bacterium	0	0.000845813	0.000437308	0	0	0	0	0.000905278	0	0	0	0	0	0	0	0	0.000266357	0	0	0	0	0.001079627	0	0	0	0	0	0	0	0	0	0	0	0
Firmicutes	Clostridia	Oscillospirales	Ruminococcaceae	Incertae_Sedis	unclassified_Incertae_Sedis	0.000290326	0.001409689	0.000384831	0	0.000857074	0.002588592	0.00136762	0.000332551	0.001854592	0.000345417	0.001419957	0.001928364	0.00095945	0.001768823	0.001556568	0.000484706	0.001560092	0.001574772	0.001501131	0.001763633	0.001468854	0.001504398	0.00135481	0.001305157	0.001351501	0.00014803	0.002383879	0.000996893	0.002183332	0.002468846	0.001462726	0.002700285	0.002145521	0.002695512
Firmicutes	Clostridia	Oscillospirales	Ruminococcaceae	Negativibacillus	unclassified_Negativibacillus	0.000793559	0.001791134	0	0.003991898	0.000874216	0.000428457	0.001421605	0.001607331	0.003016054	0	0.00055323	0	0	0.0003653	0.000493546	0.000484706	0.000437587	0.003188914	0	0	0.000154616	0	0.000451603	0.001612253	0	0	0	0	0	0	0	0	0	0
Firmicutes	Clostridia	Oscillospirales	Ruminococcaceae	Paludicola	unclassified_Paludicola	0	0	0.000647215	0	0.000754225	0.0003749	0.001169675	0.001755131	0.001105262	0	0	0	0	0.000288395	0	0	0	0	0	0	0.000657119	0	0	0	0.000462843	0	0	0	0	0.000268718	0.001294596	0.000231926	0	0.00063012
Firmicutes	Clostridia	Oscillospirales	Ruminococcaceae	Pygmaiobacter	unclassified_Pygmaiobacter	0.000212906	0.000630214	0	0.000550607	0.000308547	0	0.000305915	0	0.000374665	0.000545395	0.000276615	0.000610967	0	0.000346074	0.000398633	0.000225042	0.000475638	0	0	0	0.000560484	0	0.001110191	0	0.000444329	0.000462595	0.000633218	0.000348913	0.000253876	0.000487051	0.000487575	0.000364456	0	0.00021004
Firmicutes	Clostridia	Oscillospirales	Ruminococcaceae	Ruminococcus	Ruminococcus_sp.	0	0.001293597	0.004040722	0.001022555	0.003291165	0	0	0.000757478	0	0.000690834	0	0.000439132	0	0	0	0	0	0	0.000532046	0.000881817	0	0.001256615	0	0	0.00049987	0.000388579	0	0	0	0	0	0	0	0
Firmicutes	Clostridia	Oscillospirales	Ruminococcaceae	Ruminococcus	Ruminococcus_sp._N15.MGS_57	0.000638718	0	0	0	0	0	0	0	0	0	0	0	0	0.000634469	0.000455581	0.000450084	0.000456612	0	0	0	0	0	0	0	0	0	0	0	0.000287726	0	0	0	0	0
Firmicutes	Clostridia	Oscillospirales	Ruminococcaceae	Ruminococcus	unclassified_Ruminococcus	0.007548484	0.008806408	0.003813322	0.000550607	0.005125304	0.001481746	0.00237534	0.006078297	0.002772522	0.000581755	0.001383075	0.000305483	0.00025344	0.001115127	0.00022779	0.001436806	0.000342459	0.002303104	0.002831246	0.00202417	0.005643494	0.001292013	0.002370917	0	0.000388788	0.000869678	0.000484225	0.002459003	0.005889919	0.016509355	0.007599449	0.022629382	0.029594565	0.02194917
Firmicutes	Clostridia	Oscillospirales	Ruminococcaceae	Ruminococcus	uncultured_Ruminococcus_sp.	0	0	0	0	0	0	0	0	0	0	0	0	0	0	0	0	0	0	0.000304026	0	0	0.000389374	0	0	0	0	0	0	0.000541602	0.002351281	0.002454689	0.00263402	0.000834369	0.00110271
Firmicutes	Clostridia	Oscillospirales	Ruminococcaceae	Subdoligranulum	unclassified_Subdoligranulum	0	0.000878982	0.001049538	0	0	0	0	0	0	0	0	0	0	0	0	0	0	0	0	0	0	0	0	0	0	0	0	0	0	0	0	0	0	0
Firmicutes	Clostridia	Oscillospirales	Ruminococcaceae	UCG_001	unclassified_UCG_001	0.000696783	0	0.000349846	0	0	0	0	0	0	0.000418136	0	0	0	0.000134584	0	0.000294286	0	0	0	0	0	0	0	0	0	0	0	0	0	0.000100769	0	0.000281625	0	0
Firmicutes	Clostridia	Oscillospirales	Ruminococcaceae	[Eubacterium]_siraeum_group	unclassified_[Eubacterium]_siraeum_group	0	0.000132677	8.75E-05	0	0.001165621	0	0.00017995	7.39E-05	0	0.000199978	0	0	0	0.000519111	0.000265756	0.00038084	0.000361485	0	0	0	0	0	0	0.000268709	0	0	5.59E-05	0.000182764	0.004959041	0.003678076	0.005043882	0.004655092	0.010199738	0.004603375
Firmicutes	Clostridia	Oscillospirales	Ruminococcaceae	unclassified_Ruminococcaceae	Ruminococcus_sp._YE281	0.001741958	0	0	0	0	0	0.000449875	0.003787389	0.000262266	0.000472676	0	0	0	0	0	0	0	0	0	0	0	0	0	0	0	0	0	0	0	0	0	0	0	0
Firmicutes	Clostridia	Oscillospirales	Ruminococcaceae	unclassified_Ruminococcaceae	unclassified_Ruminococcaceae	0.011825959	0.004394912	0.011247551	0.022555208	0.023055298	0.015477997	0.018138957	0.022502633	0.025926828	0.006344762	0.004315194	0.004754086	0.006100652	0.005940937	0.007308276	0.003600672	0.004490021	0.00732269	0.008227716	0.016514019	0.011634874	0.005628219	0.007696071	0.018732846	0.010682416	0.008345207	0.007542742	0.018841278	0.012355291	0.023764737	0.020545412	0.024269432	0.02077409	0.019446195
Firmicutes	Clostridia	Oscillospirales	Ruminococcaceae	unclassified_Ruminococcaceae	uncultured_Ruminococcaceae_bacterium	0	0.003416422	0.001399384	0.000943897	0.00080565	0.001106846	0.001529575	0.002180058	0.003503119	0.001654365	0.003540672	0.002558424	0.002787835	0.003018534	0.001708428	0.001263697	0.00296798	0.004310939	0.00448439	0.003346895	0.003556174	0.002123856	0.002973054	0.00374273	0.004869108	0.000703144	0.003464074	0.001578414	0.00448514	0.000369487	0.00057164	0.000944271	0.000715174	0.001470279
Firmicutes	Clostridia	Oscillospirales	Ruminococcaceae	unclassified_Ruminococcaceae	uncultured_rumen_bacterium	0.000232261	0.001592119	0.000419815	0	0	0	0	0	0.000524531	0	0	0	0	0	0	0	0	0	0.000323028	0	0.000405868	0	0	0.000940481	0	0	0.000335233	0	0	0	0	0	0	0
Firmicutes	Clostridia	Oscillospirales	Ruminococcaceae	uncultured_Ruminococcaceae_bacterium	uncultured_Ruminococcaceae_bacterium	0	0	0	0	0	0	0	0	0	0	0	0	0	0	0	0	0	0	0	0	0	0	0	0	0	0	0	0.001711333	0.001709431	0.017869739	0.002774135	0.011894507	0.002622303	0.005286004
Firmicutes	Clostridia	Oscillospirales	UCG_010	unclassified_UCG_010	unclassified_UCG_010	0.056091046	0.030830721	0.033462776	0.055355633	0.043865062	0.052521646	0.053733062	0.046353945	0.062100747	0.043540705	0.061924871	0.042424011	0.050506879	0.061370453	0.051082005	0.02892655	0.032134092	0.068069526	0.041898645	0.04693669	0.046230262	0.034140989	0.032967033	0.04664018	0.045432666	0.025627741	0.030915931	0.008839118	0.010391984	0.019414867	0.023084166	0.018570671	0.017811228	0.020898971
Firmicutes	Clostridia	Oscillospirales	UCG_010	uncultured_Ruminococcaceae_bacterium	uncultured_Ruminococcaceae_bacterium	0.004916192	0.001111166	0.001416877	0.002812027	0.002365525	0.00257074	0.00223138	0.003233137	0.001835859	0.006817438	0.004278312	0.004124026	0.00416365	0.006306237	0.004802582	0.005799159	0.003424592	0.003759769	0	0	0.000831062	0.00251323	0.001731146	0.001343544	0.001518125	0.001591325	0.001303684	0.000265838	0	0	0	0	0	0.001190226
Firmicutes	Clostridia	Oscillospirales	[Eubacterium]_coprostanoligenes_group	Clostridiales_bacterium_42_27	unclassified_Clostridiales_bacterium_42_27	0	0	0	0	0	0	0	0	0	0	0	0	0	0	0	0	0	0	0	0	0	0	0	0	0	0	0	0.001129812	0.000440051	0.000856538	0	0.001242462	0.001021677	0
Firmicutes	Clostridia	Oscillospirales	[Eubacterium]_coprostanoligenes_group	unclassified_[Eubacterium]_coprostanoligenes_group	unclassified_[Eubacterium]_coprostanoligenes_group	0.051794217	0.024412492	0.05179471	0.050380509	0.03068326	0.046826743	0.055244642	0.041402627	0.04175643	0.021288587	0.027274236	0.017832595	0.015133961	0.021725756	0.021165528	0.013692939	0.016419018	0.033798547	0.066353773	0.06659719	0.062097756	0.046760234	0.063581966	0.078693307	0.062798534	0.050940917	0.041140537	0.101716317	0.056885113	0.073141648	0.123743233	0.073653171	0.078294481	0.051687321
Firmicutes	Clostridia	Oscillospirales	[Eubacterium]_coprostanoligenes_group	uncultured_Clostridium_sp.	uncultured_Clostridium_sp.	0.002632292	0.00446125	0.002676322	0.000688258	0.000428537	0.000339195	5.40E-05	0.000461877	0.001198928	0.00221794	0.001364634	0	0.000887038	0.001422749	0.001100987	0.000692437	0.000456612	0.00139761	0.002717236	0.003827885	0.004000696	0.006530858	0.00146771	0	0.002684489	0.005218067	0.002607368	0.0027913	0.00458669	0.011269356	0.01464407	0.009061692	0.003320449	0.002100399
Firmicutes	Clostridia	Oscillospirales	[Eubacterium]_coprostanoligenes_group	uncultured_Ruminococcaceae_bacterium	uncultured_Ruminococcaceae_bacterium	0.000909689	0.000729721	0.002361461	0	0	0.001749531	0.000377895	0	0.001648527	0.001345308	0.001567485	0.002100199	0.000796524	0.000442206	0.000493546	0.002077311	0.000970301	0.000669278	0.003040265	0.002044211	0.003246941	0.004849472	0.00323649	9.60E-05	0.001258933	0.002516515	0.003128841	0	0	0	0	0	0	0
Firmicutes	Clostridia	Oscillospirales	[Eubacterium]_coprostanoligenes_group	uncultured_rumen_bacterium	uncultured_rumen_bacterium	0	0	0	0	0	0	0	0.000905278	0	0	0	0	0	0	0	0	0	0	0	0.001162395	0	0.000318578	0	0	0	0	0	0	0	0	0	0	0	0
Firmicutes	Clostridia	Oscillospirales	unclassified_Oscillospirales	unclassified_Oscillospirales	unclassified_Oscillospirales	0.008438819	0.002835962	0.002973692	0.014119128	0.012890397	0.010693564	0.012992388	0.021468029	0.006594107	0.002726975	0.002323566	0.000820987	0.001339609	0.002249481	0.003189066	0.002302353	0.002492342	0.002106258	0.015771372	0.007936349	0.019307706	0.005504327	0.015203974	0.00946239	0.004276669	0.004718465	0.008790554	0.007360393	0.004992891	0.014376407	0.008456908	0.013816182	0.010863828	0.009399286
Firmicutes	Clostridia	Peptococcales	Peptococcaceae	Peptococcus	unclassified_Peptococcus	0	0	0	0	0	0	0	0	0	0	0	0	0	0	0	0	0	0	0	0	0	0	0	0	0	0.003386192	0	0	0	0	0	0	0	0
Firmicutes	Clostridia	Peptococcales	Peptococcaceae	unclassified_Peptococcaceae	unclassified_Peptococcaceae	0.000232261	0.000878982	0	0	0	0.000553423	0.000161955	0	0.000580731	0.001545286	0.002452653	0.003169391	0.001249095	0.002537876	0.001822323	0.002025378	0.001978653	0.000728332	0.003895339	0.006152675	0.006899751	0.004477797	0.00135481	0.008464329	0.003758285	0.00190589	0.002719112	0.000249223	0.000423126	0.000822949	0.000991963	0.000878007	0.001430347	0.000805153
Firmicutes	Clostridia	Peptostreptococcales_Tissierellales	Alkaliphilus	unclassified_Alkaliphilus	unclassified_Alkaliphilus	0	0	0	0	0	0	0	0	0	0	0	0	0.000814627	0.000807506	0.004574791	0	0	0	0	0	0	0	0	0	0	0	0	0	0	0	0	0	0	0
Firmicutes	Clostridia	Peptostreptococcales_Tissierellales	Anaerovoracaceae	Amnipila	unclassified_Amnipila	0	0	0	0	0	0	0	0	0	0	0	0	0	0	0	0	0	0	0	0	0	0	0	0	0	0	0	0	0.000660077	0.000604615	0.000319446	0.000596382	0.000187307	0.000717636
Firmicutes	Clostridia	Peptostreptococcales_Tissierellales	Anaerovoracaceae	Anaerovorax	unclassified_Anaerovorax	0.000348392	0.00039803	0	0.001415846	0.000188556	0.000767652	0.0003599	0.000609677	0.000543264	0.000309057	0.000958932	0	0	0.000403753	0.000379651	0.000173109	0	0.0002559	0.001197104	0.001022106	0.001797414	0.000849542	0.000771489	0.002629508	0.001221905	0.00083267	0.000670466	0.000249223	0	0	0	0	0.000272447	0.000280053
Firmicutes	Clostridia	Peptostreptococcales_Tissierellales	Anaerovoracaceae	Family_XIII_AD3011_group	unclassified_Family_XIII_AD3011_group	0	0	0	0.003952569	0.001594158	0.002731411	0.0003599	0.002863636	0.005601244	0.001763444	0.001622808	0.000572781	0.000850833	0.001845728	0.001746393	0.000709748	0.002359164	0.003425129	0.002812245	0.003547307	0.002841074	0.000672554	0.00182523	0.006045949	0.004517347	0.001924394	0.001527172	0.012627312	0.016891206	0.003039871	0.009785131	0.00276655	0.01258365	0.011289645
Firmicutes	Clostridia	Peptostreptococcales_Tissierellales	Anaerovoracaceae	Family_XIII_AD3011_group	uncultured_Clostridiales_Family_XIII_bacterium	0.001122595	0.000696552	0.000367338	0.002241756	0.001354177	0.000999732	0.0021594	0.00131173	0.001536127	0.001454387	0.001069578	0.001661066	0.001810282	0.001864954	0.001461655	0.000657815	0.00093225	0	0.001311114	0.001062188	0.002377225	0.001168121	0.000865573	0.002341606	0.001018255	0	0.000335233	0.001777793	0.001557105	0.001125256	0.001798984	0	0.001226012	0
Firmicutes	Clostridia	Peptostreptococcales_Tissierellales	Anaerovoracaceae	Family_XIII_AD3011_group	uncultured_rumen_bacterium	0	0	0	0	0	0	0	0	0	0	0	0	0	0	0	0	0	0	0	0	0	0	0	0.000422257	0	0	0	0.001146427	0	0	0.000470762	0.00021536	0.000476782	0.000455086
Firmicutes	Clostridia	Peptostreptococcales_Tissierellales	Anaerovoracaceae	Family_XIII_UCG_001	unclassified_Family_XIII_UCG_001	0	0	0	0	0	0	0	0	0	0	0	0	0	0	0	0	0	0	0	0	0	0	0	0	0	0	0	0	0.000863178	0.000235128	0	0	0.000221363	0.000717636
Firmicutes	Clostridia	Peptostreptococcales_Tissierellales	Anaerovoracaceae	Family_XIII_UCG_001	uncultured_rumen_bacterium	0	0	0	0	0	0	0	0	0	0	0	0	0	0	0	0	0	0	0	0	0	0	0	0	0	0	0	0.003455896	0.001117054	0.00127641	0.001109654	0.001374992	0.000510838	0.001015193
Firmicutes	Clostridia	Peptostreptococcales_Tissierellales	Anaerovoracaceae	Mogibacterium	unclassified_Mogibacterium	0	0	0	0	0	0	0	0	0	0	0	0	0	0	0	0	0	0	0	0	0	0	0	0	0	0	0	0.002608537	0	0	0.000403511	0	0.002111465	0
Firmicutes	Clostridia	Peptostreptococcales_Tissierellales	Anaerovoracaceae	Mogibacterium	uncultured_rumen_bacterium	0	0.000895567	0.000559754	0.002084439	0	0.001106846	0	0	0.002435323	7.27E-05	0	0	0.000325851	0	0	0	0	0	0.000323028	0	0	0.000159289	0	0	0	0.000185038	0	0.003273132	0.002200257	0.00193141	0.003043142	0.000762044	0.003507756	0
Firmicutes	Clostridia	Peptostreptococcales_Tissierellales	Anaerovoracaceae	[Eubacterium]_brachy_group	unclassified_[Eubacterium]_brachy_group	0.000909689	0.001194089	0.001241954	0.002300749	0.00092564	0.003088458	0.001745515	0.00284516	0.003671718	0.000763553	0.001051137	0.000935543	0	0	0	0	0.000703944	0	0	0	0	0	0	0	0	0.000999204	0	0.006928406	0.001844831	0.001797051	0.001798984	0.001027102	0	0.000490093
Firmicutes	Clostridia	Peptostreptococcales_Tissierellales	Anaerovoracaceae	[Eubacterium]_nodatum_group	unclassified_[Eubacterium]_nodatum_group	0	0	0	0.000766916	0.000137132	0.000624833	0.000413885	0	0.000430865	0	0.000829845	0	0.000597393	0.000519111	0	0.000294286	0.000989327	0	0.000646056	0.000180372	0.000483176	0	0.000545687	0.001381931	0.000759062	0	0.000372481	0.001096582	0.002758784	0	0.00057164	0.000795176	0.006232227	0.001365259
Firmicutes	Clostridia	Peptostreptococcales_Tissierellales	Anaerovoracaceae	unclassified_Anaerovoracaceae	unclassified_Anaerovoracaceae	0	0	0	0.00021631	0	0.000267785	0.00021594	0.000221701	0	0	0	0	0.000144823	0.000192263	0.000246773	0	0	9.84E-05	0.001064093	0.000220454	0.000579811	0	0.000564504	0.000652579	0	0.000388579	0	0.002625152	0.002166407	0.000957307	0.001731733	0.000977404	0.002026325	0.002240426
Firmicutes	Clostridia	Peptostreptococcales_Tissierellales	Family_XI	Tissierella	unclassified_Tissierella	0	0	0	0	0	0	0	0	0	0	0.003743523	0	0	0	0	0.002354285	0.016856605	0.00059054	0	0	0	0	0	0	0	0.007179468	0	0	0	0	0	0	0	0
Firmicutes	Clostridia	Peptostreptococcales_Tissierellales	Family_XI	Tissierella	uncultured_Tissierella_sp.	0	3.32E-05	0	0.001337188	0	0	0	0	0	0	0	0	0	0	0	0	0.00055174	0	0	0	0	0	0	0	0	0.000592121	0	0	0	0	0	0	0	0
Firmicutes	Clostridia	Peptostreptococcales_Tissierellales	Guggenheimella	unclassified_Guggenheimella	unclassified_Guggenheimella	0	0	0	0	0	0	0	0	0	0	0	0	0	0	0	0	9.51E-05	0	0	0	0	0	0	0	0	0.002627537	0	0	0	0	0	0	0	0
Firmicutes	Clostridia	Peptostreptococcales_Tissierellales	Peptostreptococcaceae	Paeniclostridium	unclassified_Paeniclostridium	0.001412921	0.004328574	0.010267982	0.001317523	0.005622407	0.001160403	0.007072034	0	0.002566456	0.002745155	0.000608553	0.000744616	0.003167994	0.002941629	0.001594533	0.004033445	0.002340138	0.004035354	0.000950083	0.002164459	0.001739433	0.001008832	0.001956947	0.003973052	0.002684489	0.001387784	0.001210564	0	0	0	0	0	0	0
Firmicutes	Clostridia	Peptostreptococcales_Tissierellales	Peptostreptococcaceae	Romboutsia	unclassified_Romboutsia	0.003967793	0.008673732	0.017632242	0.005860028	0.012016182	0.003963224	0.017887027	0.002568034	0.008429966	0.0021634	0.000940491	0.002558424	0.002226647	0.002326386	0.001461655	0.002267731	0.001198607	0.002421212	0.002964258	0.006433253	0.004735123	0.004460098	0.005268704	0.00610353	0.006035472	0.003774772	0.003240586	0.001761178	0.001066279	0.002435256	0.000655705	0.001358426	0	0.000175033
Firmicutes	Clostridia	Peptostreptococcales_Tissierellales	Peptostreptococcaceae	unclassified_Peptostreptococcaceae	unclassified_Peptostreptococcaceae	0	0.001227258	0.002011615	0.00082591	0.00114848	0	0.001025715	0.000609677	0.000955396	0	0	0.000381854	0	0.000596016	0	0	0	0	0	0.000982023	0.000657119	0.000902639	0.000771489	0.000863707	0.000610953	0.000666136	0	0.001229501	0.000609302	0.001746666	0.00183261	0.001275595	0.000323531	0
Firmicutes	Clostridia	Peptostreptococcales_Tissierellales	Sedimentibacteraceae	Sedimentibacter	unclassified_Sedimentibacter	0	0	0	0	0	0	0	0	0	0.000636294	0.000350379	0.000458225	0.00095945	0.002249481	0.001082005	0.000276975	0	0.00055117	0	0	0	0	0	0	0	0.002794071	0	0	0	0	0	0	0	0
Firmicutes	Clostridia	unclassified_Clostridia	unclassified_Clostridia	unclassified_Clostridia	unclassified_Clostridia	0.004703286	0.000961905	0.003201092	0.012801605	0.004576777	0.007837186	0.017923017	0.009570085	0.007718102	0.00325419	0.004776218	0.001393768	0.002986966	0.003768361	0.002885345	0.000796302	0.002739674	0.005058956	0.016911471	0.014650179	0.014398639	0.006176882	0.011628782	0.009097714	0.01234865	0.013119183	0.006499795	0.00932095	0.009088755	0.023966276	0.015114832	0.024368829	0.021540348	0.021826647
Firmicutes	Clostridia	unclassified_Clostridia	uncultured_rumen_bacterium	unclassified_Clostridia	unclassified_Clostridia	0	0	0	0	0	0.000553423	0	0	0	0	0	0	0	0	0	0	0	0.000177162	0.000304026	0.000761569	0	0	0	0.000940481	0	0	0	0	0.000355426	0.000151154	0	0	0.000630034	0
Firmicutes	Clostridia	unclassified_Clostridia	uncultured_rumen_bacterium_4C0d_17	unclassified_Clostridia	unclassified_Clostridia	0.000309681	0	0	0	0	0	0	0	0	0	0	0	0	0	0	0	0	0	0	0.000681404	0	0.000212386	0.00041397	0	0.000610953	0	0	0	0.00010155	0.000554231	0	0	0	0
Firmicutes	Negativicutes	Acidaminococcales	Acidaminococcaceae	Phascolarctobacterium	unclassified_Phascolarctobacterium	0	0	0	0	0	0	0	0	0	0	0.000608553	0	0	0.000653695	0	0.000640504	0	0	0.003762327	0.005992344	0	0	0.005268704	0.004875146	0	0.002146439	0	0	0	0	0	0	0	0
Firmicutes	Negativicutes	Acidaminococcales	Acidaminococcaceae	Phascolarctobacterium	uncultured_Veillonellaceae_bacterium	0.001122595	0.00213941	0.002571369	0.001376517	0.000891357	0.00091047	0.00079178	0.000702053	0.001798393	0.007871869	0.004665573	0.007083397	0.004779146	0.00519111	0.006207289	0.006370419	0.007362874	0.006436881	0.005700496	0.00264545	0.007614851	0.00723881	0.004365498	0.005316597	0.007831303	0.007808597	0.008343577	0.00074767	0.000643152	0.000806154	0.000554827	0.000265059	0.001481431	0.001382763
Firmicutes	Negativicutes	Veillonellales_Selenomonadales	Selenomonadaceae	Anaerovibrio	unclassified_Anaerovibrio	0	0.008093272	0.001924153	0	0.00034283	0.002035169	0	0	0	0.000345417	0.000147528	0.000229113	0	0	5.69E-05	0	0	0.000157477	0.001577137	0.00140289	0.00019327	0.00369905	0.00658588	0	0.003091791	0.00053661	0.003892427	0	0	0	0	0	0	0
Firmicutes	Negativicutes	Veillonellales_Selenomonadales	Selenomonadaceae	Quinella	unclassified_Quinella	0	0	0	0	0	0	0	0	0	0	0	0	0	0	0	0	0	0	0.001387121	0.001082229	0.000347887	0.001592892	0.000451603	0	0.000573925	0.001295265	0.002179014	0	0	0	0	0	0	0
Patescibacteria	Saccharimonadia	Saccharimonadales	Saccharimonadaceae	Candidatus_Saccharimonas	unclassified_Candidatus_Saccharimonas	0	0	0	0	0	0	0	0	0.000412132	0	0	0	0	0	0	0	0	0	0	0	0	0	0	0	0	0	0	0.008257597	0.005145217	0.005004871	0.003951041	0.00419124	0.002366884	0.003570678
Patescibacteria	Saccharimonadia	Saccharimonadales	Saccharimonadaceae	Candidatus_Saccharimonas	uncultured_rumen_bacterium	0.007316223	0.004378327	0.011247551	0.019290897	0.009479242	0.007801482	0.006064314	0.012895597	0.011408554	0.000818093	0.00165969	0.001260119	0.000941347	0.000845959	0.000873197	0	0.000856148	0	0.002109183	0.004649578	0.003246941	0.002230049	0.007808972	0.001746608	0.00209205	0.002942102	0.002104518	0.045807234	0.029195721	0.008598972	0.022378022	0.007984892	0.009705927	0.013215011
Proteobacteria	Alphaproteobacteria	Acetobacterales	Acetobacteraceae	Acetobacter	unclassified_Acetobacter	0	0.000530706	0	0	0.000102849	0	0	0	0.00086173	0	0	0	0	0	0	0	0	0.000177162	0.000380033	0	0	0	0.000395153	0	0.000518384	0	0.000316609	0.000215993	0	0.000201538	0.000302633	0	0	0.000612616
Proteobacteria	Alphaproteobacteria	Rhizobiales	Devosiaceae	Pelagibacterium	unclassified_Pelagibacterium	0	0	0	0	0	0	0	0	0	0.000327237	0.000645435	0.000324576	0	0	0	0	0.000418561	0.000334639	0	0	0	0	0	0	0	0	0	0	0	0	0	0	0	0
Proteobacteria	Alphaproteobacteria	Rhizobiales	Rhizobiaceae	unclassified_Rhizobiaceae	unclassified_Rhizobiaceae	0.00106453	8.29E-05	0	0.000884904	0	0	0	0.000849853	0.000168599	0	0	0	0	0	0	0	0	0	0	0	0	0	0.000263435	0	0	0	0	0	0	0	0	0	0	0
Proteobacteria	Alphaproteobacteria	Rhodobacterales	Rhodobacteraceae	unclassified_Rhodobacteraceae	unclassified_Rhodobacteraceae	0	0	0	0	0	0	0	0	0	0	0	0	0	0	0	0	0	0	0	0	0	0	0	0	0	0	0	0.00350574	0.001252454	0	0	0	0	0
Proteobacteria	Alphaproteobacteria	Rhodospirillales	unclassified_Rhodospirillales	unclassified_Rhodospirillales	unclassified_Rhodospirillales	0	0	0	0	0	0	0	0	0	0	0	0	0	0	0	0	0	0	0	0.002324789	0	0	0	0	0	0	0	0	0	0	0	0	0	0
Proteobacteria	Alphaproteobacteria	Rhodospirillales	unclassified_Rhodospirillales	uncultured_rumen_bacterium	unclassified_Rhodospirillales	0	0	0	0	0	0	0	0	0	0.000999891	0	0	0	0	0	0	0	0	0	0.002986151	0	0	0	0	0.000388788	0.000629129	0	0	0	0	0	0	0	0
Proteobacteria	Alphaproteobacteria	Rhodospirillales	unclassified_Rhodospirillales	unidentified_rumen_bacterium_RF32	unclassified_Rhodospirillales	0.001683893	0	0.000349846	0.001022555	0	0.002463626	0.001493585	0.000387976	0.001273861	0.000199978	0.000313497	0	0	0.000519111	0.000664389	0.000346218	0	0.000570855	0.002622228	0.001763633	0.000773081	0.001061928	0.000846756	0.003781117	0.000759062	0.000610625	0	0	0	0	0	0	0	0.00078765
Proteobacteria	Alphaproteobacteria	Rickettsiales	Mitochondria	unclassified_Mitochondria	unclassified_Mitochondria	0	0	0	0	0	0	0	0	0	0	0	0	1.81E-05	0.00057679	0.00134776	0.000242353	0	1.97E-05	0	0	0	0	0	0	0	0	0	0.001079967	0.000575452	0.000822949	0.001597229	0.000911139	0	0.000297557
Proteobacteria	Gammaproteobacteria	Burkholderiales	Comamonadaceae	Comamonas	unclassified_Comamonas	0	0	0	0	0	0	0	0	0	0.024942734	0.013148432	0.035397892	0.03294714	0	0.000550494	0.011130922	0.002682597	0.016613846	0	0	0	0	0	0	0	0	0	0	0	0	0	0	0	0
Proteobacteria	Gammaproteobacteria	Burkholderiales	Comamonadaceae	unclassified_Comamonadaceae	unclassified_Comamonadaceae	0	0	0	0	0	0	0	0	0	0.000799913	0.002729268	0	0.000343954	0	0	0	0.000266357	0.000452747	0	0	0	0	0	0	0	0	0	0	0	0	0	0	0	0
Proteobacteria	Gammaproteobacteria	Burkholderiales	Sutterellaceae	Parasutterella	uncultured_Burkholderiales_bacterium	7.74E-05	0	3.50E-05	0	3.43E-05	0	0	0	0	0.002763335	0.000940491	0.001451046	0.000561188	0.000711374	0.000930144	0.002129243	0.0018645	0.002992067	0.000380033	0.000480991	0.00052183	0	0.000432786	0.000479837	0.000370274	0.000240549	5.59E-05	0	0	0	0	0	0	0
Proteobacteria	Gammaproteobacteria	Burkholderiales	Sutterellaceae	Sutterella	unclassified_Sutterella	0	0	0	0	0	0	0	0	0	0	0	0	0	0	0.000132878	0	0.000361485	0.001062971	0.000209018	0	0.000695773	0	0	3.84E-05	0.00064798	9.25E-05	0.000577346	0	0	0	0	0	0	0
Proteobacteria	Gammaproteobacteria	Enterobacterales	Enterobacteriaceae	Escherichia_Shigella	unclassified_Escherichia_Shigella	0.010703364	0.004560758	0.011614889	0.003224982	0.003445439	0.003374096	0.002501305	0.000923753	0.004458515	0.002308839	0.00018441	0.015942416	0.003729182	0.003268477	0.006055429	6.92E-05	0.000608816	0.001968465	0.000266023	0.000180372	0.005353588	0	0.000301069	0	0.000203651	0.000721648	0	0	0	0	0.000100878	0	0	0
Proteobacteria	Gammaproteobacteria	Enterobacterales	Shewanellaceae	Shewanella	Shewanella_morhuae	0	0	0	0	0	0	0	0	0	0.00105443	0	0.00063006	0.00083273	0	0	0	0	0	0	0	0	0	0	0	0	0	0	0	0	0	0	0	0	0
Proteobacteria	Gammaproteobacteria	Enterobacterales	Succinivibrionaceae	Ruminobacter	uncultured_Ruminobacter_sp.	0	0.000116092	0	0	0	1.79E-05	0	1.85E-05	5.62E-05	0.004872196	0.001253988	0.001641973	0	7.69E-05	0.000778284	0.000207731	9.51E-05	0.000669278	0.000304026	0.00016033	0.000831062	0	0.000489237	0.000499031	0.0009442	0.003145643	0.002104518	0	0	0	0	0	0	0
Proteobacteria	Gammaproteobacteria	Enterobacterales	Succinivibrionaceae	Succinivibrio	unclassified_Succinivibrio	0	0	0	0	0	0	0	0	0	0	0	0	0	0	0	0	0	0	0.006574572	0	0	0	0.001091374	0	0.001814344	0.002442499	0.01823295	0	0	0	0	0	0	0
Proteobacteria	Gammaproteobacteria	Enterobacterales	Succinivibrionaceae	Succinivibrio	uncultured_Succinivibrio_sp.	0.003754887	0.021344345	0.054488525	0	0.003394014	0.010764974	0	0.000332551	0.00161106	0.000181798	0.000147528	0.000458225	0	5.77E-05	7.59E-05	0	0	0.000492116	0.014897296	0.007816101	0.007131675	0.024760624	0.021037182	0.000326289	0.016458696	0.014284921	0.012384996	0	0	0	0	1.66E-05	0	0
Proteobacteria	Gammaproteobacteria	Pseudomonadales	Cellvibrionaceae	Aestuariicella	unclassified_Aestuariicella	0	0	0	0	0	0	0	0	0	0	0.001088019	0	0.00141202	0	0	0.000294286	0.001997679	0.000511801	0	0	0	0	0	0	0	0.000185038	0	0	0	0	0	0	0	0
Proteobacteria	Gammaproteobacteria	Pseudomonadales	Halomonadaceae	Halomonas	unclassified_Halomonas	0	0.000132677	0	0.020372446	0	0.000232081	0.0003599	0	0	0	0	0	0	0	0	0	0	0	0	0	0	0	0	0	0	9.25E-05	0	0	0	0	0	0	0	0
Proteobacteria	Gammaproteobacteria	Pseudomonadales	Halomonadaceae	Marinospirillum	Marinospirillum_minutulum	0	0	0	0	0	0	0	0	0	0	0.010124108	0	0	0	0	0.010040334	0.023325279	0.000688963	0	0	0	0	0	0	0	0.000203542	0	0	0	0	0	0	0	0
Proteobacteria	Gammaproteobacteria	Pseudomonadales	Moraxellaceae	Acinetobacter	unclassified_Acinetobacter	0	0	0	0	0	0	0	0	0	0.144984184	0.032363952	0.118279365	0.182585083	0.149792356	0.181681853	0.268475081	0.069100664	0.142142871	0	0	1.93E-05	0	0	0	0	0.000777159	0	0.006147507	0.00140478	0	0	0	0	0
Proteobacteria	Gammaproteobacteria	Pseudomonadales	Moraxellaceae	Psychrobacter	unclassified_Psychrobacter	1.94E-05	0	0	0	0	0	0	0	0	0.066229139	0.112305678	0.011990225	0.036549602	0.001788049	0.033200456	0.149047034	0.057095565	0.02826716	0	0	0	0	0	0	0	0.009862517	0	0	0	0	0	0	0	0
Proteobacteria	Gammaproteobacteria	Pseudomonadales	Pseudomonadaceae	Pseudomonas	Denitrificimonas_caeni	0	0	0	0	0	0	0	0	0	0	0	0	0	0	0	0	0.005593501	0	0	0	0	0	0	0	0	0	0	0	0	0	0	0	0	0
Proteobacteria	Gammaproteobacteria	Pseudomonadales	Pseudomonadaceae	Pseudomonas	Halopseudomonas_litoralis	0	0	0	0	0	0	0	0	0	0.000545395	0.001825659	0	0.00519551	0.000845959	0.000284738	0.000917479	0.002948955	0.000728332	0	0	0	0	0	0	0	0.00151731	0	0	0	0	0	0	0	0
Proteobacteria	Gammaproteobacteria	Pseudomonadales	Pseudomonadaceae	Pseudomonas	Pseudomonas_sp._108Z1	0	0	0	0	0	0	0	0	0	0	0	0	0	0	0	0.001609916	0.005289093	0	0	0	0	0	0	0	0	0	0	0	0	0	0	0	0	0
Proteobacteria	Gammaproteobacteria	Pseudomonadales	Pseudomonadaceae	Pseudomonas	Pseudomonas_sp._76_2010	0	0	0	0	0	0	0	0	0	0	0	0	0	0	0	0	0.002720648	0	0	0	0	0	0	0	0	0	0	0	0	0	0	0	0	0
Proteobacteria	Gammaproteobacteria	Pseudomonadales	Pseudomonadaceae	Pseudomonas	Pseudomonas_sp._MYb218	0	0	0	0	0	0	0	0	0	0.000309057	0	0	0.001774077	0	0	0.000276975	0.000342459	0.0002559	0	0	0	0	0	0	0	0	0	0	0	0	0	0	0	0
Proteobacteria	Gammaproteobacteria	Pseudomonadales	Pseudomonadaceae	Pseudomonas	unclassified_Pseudomonas	0	0	0	0.00369693	0	0.000107114	0.00025193	0	0	0.01985238	0.040201376	0.000610967	0.041310644	0.004056756	0.004764617	0.06969377	0.089800422	0.020590146	1.90E-05	0	0	0	0	0	0	0.00723498	0	0	0	0	0	0	0	0
Proteobacteria	Gammaproteobacteria	Pseudomonadales	Saccharospirillaceae	Oceanobacter	unclassified_Oceanobacter	0	0	0	0	0	0	0	0	0	0.000109079	0.015435115	0	0.000724113	0	0	0.001021344	0.016818554	0.002303104	0	0	0	0	0	0	0	0	0	0	0	0	0	0	0	0
Proteobacteria	Gammaproteobacteria	Pseudomonadales	Spongiibacteraceae	BD1_7_clade	unclassified_BD1_7_clade	0	0	0	0	0	0	0	0	0	0	0.006509672	0	0	0	0	0	0	0	0	0	0	0	0	0	0	0	0	0	0	0	0	0	0	0
Proteobacteria	Gammaproteobacteria	Pseudomonadales	unclassified_Pseudomonadales	unclassified_Pseudomonadales	unclassified_Pseudomonadales	0	0	0	0	0	0	0	0	0	0	0.000866727	0	0	0	0	0	0.002168909	0	0	0	0	0	0	0	0	0	0	0	0	0	0	0	0	0
Proteobacteria	Gammaproteobacteria	Xanthomonadales	Xanthomonadaceae	Stenotrophomonas	unclassified_Stenotrophomonas	0	0	0	0	0	0	0	0	0	0.000236338	0.000424143	0	0.000742216	0	0	0	0.000228306	0.000885809	0	0	0	0	0	0	0	0	0	0	0	0	0	0	0	0
Spirochaetota	Spirochaetia	Spirochaetales	Spirochaetaceae	GWE2_31_10	unclassified_GWE2_31_10	0	0	0	0	0	0.001267518	0	0.000628152	0.001892059	0.003181471	0.003356262	0.000400947	0.000416365	0.00057679	0.003227031	0.004362352	0.002777725	0.000629909	0.001159101	0.007755977	0.001449527	0	0	0	0	0	0	0	0	0	0	0	0	0
Spirochaetota	Spirochaetia	Spirochaetales	Spirochaetaceae	Sphaerochaeta	unclassified_Sphaerochaeta	0	0	0	0	0	0.000642685	0	0.000147801	0	0.000127259	0	0.000229113	0	0.000269169	0	0.00038084	0.001522041	0	0.000475041	8.02E-05	0.000309233	0	0.000301069	0	0	0.000240549	0	0	0	0	0	0	0	0
Spirochaetota	Spirochaetia	Spirochaetales	Spirochaetaceae	Treponema	Treponema_saccharophilum	0.000387102	0	0	0	0	0	0	0	0	0	0	0	0	0	0	0	0	9.84E-05	0.025614228	0.011162996	0.007769467	0.001150422	0.000790306	0	0.000277706	0.002553522	0.001750661	0	0	0	0	0	0	0
Spirochaetota	Spirochaetia	Spirochaetales	Spirochaetaceae	Treponema	unclassified_Treponema	0.032148802	0.003134484	0.011667366	0.003323304	0.045253523	0.029670624	0.03536017	0.009496185	0.006275641	0.013653056	0.003024324	0.00337941	0.002335264	0.004691225	0.004897494	0.018072602	0.007496052	0.010393496	0.017481521	0.028338377	0.005604839	0.063556397	0.021902755	0.004433696	0.013774207	0.042614215	0.057660074	0.003655274	0.003605037	0.007893588	0.002555567	0.006063216	0.013894801	0.002502976
Spirochaetota	Spirochaetia	Spirochaetales	Spirochaetaceae	Treponema	uncultured_rumen_bacterium	0	0.039985406	0	0	0.004919606	0.016192091	0	0	0	0	0	0	0	0	0	0	0	0	0.039409429	0	0.001836068	0.002530929	0.004214963	0	0	0.002368484	0	0	0	0	0	0	0	0
Verrucomicrobiota	Kiritimatiellae	WCHB1_41	unclassified_WCHB1_41	unclassified_WCHB1_41	unclassified_WCHB1_41	0	0	0	0	0	0	0	0	1.87E-05	0.000163619	7.38E-05	0.000114556	0	0.000230716	0	0	0	0.000216531	0.001425124	0.000761569	1.93E-05	0	0.001147825	0.001324351	0	0	0	0	0	0	0	0	1.70E-05	0.000175033
Verrucomicrobiota	Kiritimatiellae	WCHB1_41	uncultured_rumen_bacterium	uncultured_rumen_bacterium	uncultured_rumen_bacterium	0.000193551	0	0	3.93E-05	0	0	0	0	0	0.002327019	0.004038579	0.001680159	0.001593049	0.005710221	0.005334093	0.002942857	0.002720648	0.005590441	0.002204192	0.002164459	0.001971357	8.85E-05	0.000602138	0.001631447	0.00064798	9.25E-05	0	0.002326084	0.001150904	0.001494743	0.001042402	0.001176198	0.001379263	0.001207729
Verrucomicrobiota	Lentisphaeria	Victivallales	Victivallaceae	Victivallis	unclassified_Victivallis	0	0	0	0	0	0	1.80E-05	0	0	0.000490856	0.000571671	0.000152742	0.000289645	0.000442206	0.000664389	6.92E-05	0.000285383	0.00055117	0	0	0	0	0	0	0	0	0	0	0	0	1.68E-05	0	0	0
Verrucomicrobiota	Lentisphaeria	Victivallales	Victivallaceae	unclassified_Victivallaceae	unclassified_Victivallaceae	0	0	0	0	0	0	0	0	0	0	0	0.000152742	0.000651702	0.00151888	0.00149962	0	0	0	0	0	0	0	0	0	0	0	0	0	0	0	0	0	0	0
Verrucomicrobiota	Verrucomicrobiae	Verrucomicrobiales	Akkermansiaceae	Akkermansia	unclassified_Akkermansia	0.000619363	0.006368476	0.000629723	0.000845574	0.003891117	0.00324913	0.00165554	0	0.001704726	0.001508926	0.000811404	0.002081106	0.001574946	0.002653234	0.003701595	0.000588571	0.000456612	0.000866125	0.008284721	0.010782211	0.004696469	0.004053026	0.007225651	0.009424003	0.003091791	0.004422404	0.009107163	0.028527755	0.040823235	0.066373316	0.021032987	0.083079319	0.007339043	0.025432332
unclassified_Bacteria	unclassified_Bacteria	unclassified_Bacteria	unclassified_Bacteria	unclassified_Bacteria	unclassified_Bacteria	0	0	1.75E-05	0	0	0	0	0	0	0	0	0	0	0	0	0	0	0	0	0	0	0	0	0	0	0	0	0.010500606	0.001997157	0.002787948	0.008994922	0.003246968	0.000919509	0.00078765
